# Supplementary material for: Whole-Transcriptome Analysis Reveals Long Noncoding RNAs Involved in Female Floral Development of Hickory (Carya cathayensis Sarg.)
Source: Front Genet. 2022 May 11;13:910488. doi: 10.3389/fgene.2022.910488 (PMC9130753; doi:10.3389/fgene.2022.910488)
Supplement: Supplementary file 11 [file DataSheet2.xlsx]

## Sheet: Table S2
Table S2 Genes expression in hickory female floral development.
gene ID	mRNA ID	Assembly ID	Scaffold ID	Start	End	Strand	C1 FPKM	C2 FPKM	C3 FPKM
CCA0001S0001	evm.TU.Contig0.1	Contig0	scaffold1	12600	13065	-	0	0	0
CCA0001S0004	evm.TU.Contig0.4	Contig0	scaffold1	104905	107460	-	0.243012	2.3428	6.20659
CCA0001S0005	evm.TU.Contig0.5	Contig0	scaffold1	119724	122966	-	0.144588	0	0.418331
CCA0001S0007	evm.TU.Contig0.7	Contig0	scaffold1	216084	217335	-	0	0	0
CCA0001S0008	evm.TU.Contig0.8	Contig0	scaffold1	250191	251704	-	11.81	15.2452	10.1943
CCA0001S0009	evm.TU.Contig0.9	Contig0	scaffold1	259771	265122	+	38.2423	23.1815	23.2631
CCA0001S0010	evm.TU.Contig0.10	Contig0	scaffold1	265493	265825	+	8.17931	2.53472	0
CCA0001S0011	evm.TU.Contig0.11	Contig0	scaffold1	267314	280617	-	40.0792	9.68445	26.3553
CCA0001S0012	evm.TU.Contig0.12	Contig0	scaffold1	282721	284910	+	6.88784	13.096	14.585
CCA0001S0013	evm.TU.Contig0.13	Contig0	scaffold1	285202	287305	+	3.89225	7.17129	6.16455
CCA0001S0014	evm.TU.Contig0.14	Contig0	scaffold1	294905	296592	+	16.2153	21.2644	18.226
CCA0001S0015	evm.TU.Contig0.15	Contig0	scaffold1	300574	306079	-	13.1011	18.4965	8.81146
CCA0001S0016	evm.TU.Contig0.16	Contig0	scaffold1	343243	348968	+	3.51616	7.90754	11.3751
CCA0001S0017	evm.TU.Contig0.17	Contig0	scaffold1	349458	352407	-	3.99415	1.77642	3.87235
CCA0001S0018	evm.TU.Contig0.18	Contig0	scaffold1	360440	363673	+	0.157523	0.0574267	0.222761
CCA0001S0019	evm.TU.Contig0.19	Contig0	scaffold1	364194	364550	+	0.323998	0.317066	0.998259
CCA0001S0020	evm.TU.Contig0.20	Contig0	scaffold1	365117	366130	-	80.3306	105.398	57.8342
CCA0001S0021	evm.TU.Contig0.21	Contig0	scaffold1	379403	393962	+	44.3951	60.5413	34.9382
CCA0001S0022	evm.TU.Contig0.22	Contig0	scaffold1	401264	405935	-	11.479	2.97786	6.56082
CCA0001S0023	evm.TU.Contig0.23	Contig0	scaffold1	428658	431328	+	0	0	0
CCA0001S0024	evm.TU.Contig0.24	Contig0	scaffold1	438140	438929	+	0	0	0
CCA0001S0025	evm.TU.Contig0.25	Contig0	scaffold1	443202	446682	+	43.0843	72.8144	47.3154
CCA0001S0026	evm.TU.Contig0.26	Contig0	scaffold1	448620	449809	-	0.134686	0	0.0692549
CCA0001S0027	evm.TU.Contig0.27	Contig0	scaffold1	453295	509580	-	13.8223	12.6826	20.4177
CCA0001S0029	evm.TU.Contig0.29	Contig0	scaffold1	510630	516644	-	9.30637	9.05542	8.65972
CCA0001S0030	evm.TU.Contig0.30	Contig0	scaffold1	544010	545362	-	1.3178	1.50419	5.00854
CCA0001S0031	evm.TU.Contig0.31	Contig0	scaffold1	550677	555582	-	9.47749	5.3882	12.3339
CCA0001S0032	evm.TU.Contig0.32	Contig0	scaffold1	557129	560557	-	4.17967	4.76966	5.09733
CCA0001S0034	evm.TU.Contig0.34	Contig0	scaffold1	622474	624865	-	6.54887	6.70846	13.8637
CCA0001S0035	evm.TU.Contig0.35	Contig0	scaffold1	630092	639853	+	5.33787	7.16198	5.36185
CCA0001S0036	evm.TU.Contig0.36	Contig0	scaffold1	641890	645188	+	0	0.0135848	0.100617
CCA0002S0001	evm.TU.Contig1.1	Contig1	scaffold2	5896	9601	-	212.778	92.9072	127.428
CCA0002S0003	evm.TU.Contig1.3	Contig1	scaffold2	14391	18091	+	16.1557	10.2276	21.6923
CCA0002S0004	evm.TU.Contig1.4	Contig1	scaffold2	18926	19759	-	1595.47	760.896	1413.15
CCA0002S0005	evm.TU.Contig1.5	Contig1	scaffold2	24179	25209	+	3.34003	2.26466	2.5373
CCA0002S0008	evm.TU.Contig1.8	Contig1	scaffold2	36458	37368	-	0	0.574274	0
CCA0003S0001	evm.TU.Contig10.1	Contig10	scaffold3	1684	5097	-	2.49257	2.69706	1.51633
CCA0003S0002	evm.TU.Contig10.2	Contig10	scaffold3	6015	7018	+	74.4568	35.9709	32.4158
CCA0003S0003	evm.TU.Contig10.3	Contig10	scaffold3	8670	9016	+	0	0	0
CCA0003S0004	evm.TU.Contig10.4	Contig10	scaffold3	9200	10885	+	223.289	104.102	142.461
CCA0003S0006	evm.TU.Contig10.6	Contig10	scaffold3	14076	14993	+	131.52	50.6077	72.7371
CCA0003S0007	evm.TU.Contig10.7	Contig10	scaffold3	15039	16349	+	238.28	94.8475	117.399
CCA0004S0001	evm.TU.Contig1002.1	Contig1002	scaffold26	3300	7182	+	13.9213	9.73657	13.3494
CCA0005S0001	evm.TU.Contig1003.1	Contig1003	scaffold37	2089	5964	+	0.640901	0.124671	1.40601
CCA0005S0004	evm.TU.Contig1003.4	Contig1003	scaffold37	45666	46217	+	0	0	0
CCA0006S0001	evm.TU.Contig1005.1	Contig1005	scaffold59	903	3692	-	0.595419	0.821575	2.489
CCA0006S0002	evm.TU.Contig1005.2	Contig1005	scaffold59	6644	20033	-	21.2118	19.3445	18.4858
CCA0006S0004	evm.TU.Contig1005.4	Contig1005	scaffold59	51642	53093	-	0.51149	0.684341	0.460187
CCA0006S0005	evm.TU.Contig1005.5	Contig1005	scaffold59	54539	63439	-	3.21456	3.13591	2.18812
CCA0006S0006	evm.TU.Contig1005.6	Contig1005	scaffold59	98146	100258	-	0.084475	2.06938	6.39447
CCA0006S0007	evm.TU.Contig1005.7	Contig1005	scaffold59	119867	122516	+	0.99358	51.5218	24.2359
CCA0006S0009	evm.TU.Contig1005.9	Contig1005	scaffold59	134915	138934	+	8.90601	11.5586	9.69856
CCA0006S0010	evm.TU.Contig1005.10	Contig1005	scaffold59	146697	162038	+	18.3342	8.11471	15.7878
CCA0006S0011	evm.TU.Contig1005.11	Contig1005	scaffold59	183874	208219	-	3.33229	2.65355	4.0474
CCA0006S0012	evm.TU.Contig1005.12	Contig1005	scaffold59	209274	222880	-	2.78928	3.66481	5.58217
CCA0006S0013	evm.TU.Contig1005.13	Contig1005	scaffold59	228266	228725	-	48.9412	8.86981	5.15874
CCA0006S0016	evm.TU.Contig1005.16	Contig1005	scaffold59	271869	285464	+	29.46	26.3087	25.5213
CCA0006S0017	evm.TU.Contig1005.17	Contig1005	scaffold59	287586	305277	+	20.3989	14.6547	8.50684
CCA0006S0018	evm.TU.Contig1005.18	Contig1005	scaffold59	309756	312919	+	1.75705	46.635	8.73646
CCA0007S0001	evm.TU.Contig1006.1	Contig1006	scaffold70	3218	4804	+	0.914223	0.355809	0.313348
CCA0007S0002	evm.TU.Contig1006.2	Contig1006	scaffold70	7024	21136	-	5.82412	11.5087	9.20671
CCA0007S0004	evm.TU.Contig1006.4	Contig1006	scaffold70	60825	64018	+	122.227	162.414	104.551
CCA0007S0005	evm.TU.Contig1006.5	Contig1006	scaffold70	178142	179639	+	0	0.0418427	0.132719
CCA0008S0001	evm.TU.Contig1007.1	Contig1007	scaffold81	79658	83875	+	0.352294	0	0.241423
CCA0008S0002	evm.TU.Contig1007.2	Contig1007	scaffold81	78900	79395	+	0	0	0
CCA0009S0001	evm.TU.Contig1008.1	Contig1008	scaffold92	18255	28078	-	5.93968	3.43073	10.7571
CCA0009S0003	evm.TU.Contig1008.3	Contig1008	scaffold92	65016	94499	-	8.56394	5.60139	3.07292
CCA0009S0004	evm.TU.Contig1008.4	Contig1008	scaffold92	123161	123487	-	0	0	0
CCA0009S0005	evm.TU.Contig1008.5	Contig1008	scaffold92	128592	128948	-	0	0	0
CCA0009S0007	evm.TU.Contig1008.7	Contig1008	scaffold92	143802	148060	+	0	0	0
CCA0009S0009	evm.TU.Contig1008.9	Contig1008	scaffold92	205930	208569	-	23.0872	16.7555	31.0059
CCA0010S0001	evm.TU.Contig1010.1	Contig1010	scaffold115	33101	34366	+	20.1388	46.2479	15.4612
CCA0010S0002	evm.TU.Contig1010.2	Contig1010	scaffold115	52379	54091	+	12.2606	26.7093	9.77293
CCA0011S0002	evm.TU.Contig1011.2	Contig1011	scaffold125	9646	10204	+	1.61603	25.9076	720.507
CCA0012S0001	evm.TU.Contig10114.1	Contig10114	scaffold130	71	310	+	0	0	0
CCA0013S0001	evm.TU.Contig1012.1	Contig1012	scaffold136	1703	3793	-	89.0319	11.7885	7.37264
CCA0013S0002	evm.TU.Contig1012.2	Contig1012	scaffold136	54126	55311	-	254.799	28.9058	42.8609
CCA0013S0003	evm.TU.Contig1012.3	Contig1012	scaffold136	67126	70614	+	1.57852	1.41219	3.01715
CCA0013S0004	evm.TU.Contig1012.4	Contig1012	scaffold136	70871	75351	+	0.0260706	0.0506962	0.187684
CCA0013S0005	evm.TU.Contig1012.5	Contig1012	scaffold136	78111	84950	+	0	0	0
CCA0013S0007	evm.TU.Contig1012.7	Contig1012	scaffold136	103850	113954	+	0.0308503	0	0.0634535
CCA0014S0002	evm.TU.Contig1013.2	Contig1013	scaffold147	23626	24525	+	0.0584443	0.0568625	0.600958
CCA0014S0006	evm.TU.Contig1013.5_evm.TU.Contig1013.6	Contig1013	scaffold147	44838	52296	-	1.30813	2.30454	3.29005
CCA0014S0010	evm.TU.Contig1013.10	Contig1013	scaffold147	84287	112522	+	29.2167	23.5063	29.1274
CCA0014S0012	evm.TU.Contig1013.12	Contig1013	scaffold147	153285	176774	+	3.48891	3.20217	6.6571
CCA0014S0013	evm.TU.Contig1013.13	Contig1013	scaffold147	194419	198288	-	14.8018	5.63267	18.6033
CCA0014S0014	evm.TU.Contig1013.14	Contig1013	scaffold147	215644	231826	+	37.0479	26.0492	28.8539
CCA0014S0015	evm.TU.Contig1013.15	Contig1013	scaffold147	251034	251444	+	14.1381	20.9004	18.585
CCA0014S0016	evm.TU.Contig1013.16	Contig1013	scaffold147	254203	273320	-	7.60959	3.66275	5.50618
CCA0014S0017	evm.TU.Contig1013.17	Contig1013	scaffold147	284656	284832	+	0	0	0
CCA0014S0019	evm.TU.Contig1013.19	Contig1013	scaffold147	288651	291006	-	0	0	0
CCA0014S0020	evm.TU.Contig1013.20	Contig1013	scaffold147	291075	291488	+	5.70785	6.16701	5.2363
CCA0014S0021	evm.TU.Contig1013.21	Contig1013	scaffold147	291517	296183	+	3.98044	3.8366	4.23833
CCA0014S0022	evm.TU.Contig1013.22	Contig1013	scaffold147	301890	306869	+	102.451	109.724	98.9105
CCA0014S0023	evm.TU.Contig1013.23	Contig1013	scaffold147	310757	311437	+	0	0.217309	0
CCA0014S0024	evm.TU.Contig1013.24	Contig1013	scaffold147	313041	317287	-	14.4639	19.3915	12.9249
CCA0014S0025	evm.TU.Contig1013.25	Contig1013	scaffold147	325720	330539	-	7.55257	9.73397	5.99884
CCA0014S0026	evm.TU.Contig1013.26	Contig1013	scaffold147	332943	334345	-	12.61	38.6559	32.7222
CCA0014S0027	evm.TU.Contig1013.27	Contig1013	scaffold147	349103	354814	+	62.794	57.1651	56.5111
CCA0014S0028	evm.TU.Contig1013.28	Contig1013	scaffold147	355478	371899	-	89.6214	90.5792	91.4187
CCA0014S0029	evm.TU.Contig1013.29	Contig1013	scaffold147	380147	383007	-	0	0	0
CCA0014S0030	evm.TU.Contig1013.30	Contig1013	scaffold147	385104	391093	-	16.659	16.3303	14.2139
CCA0014S0031	evm.TU.Contig1013.31	Contig1013	scaffold147	392225	420239	+	16.7052	8.2225	6.48986
CCA0014S0032	evm.TU.Contig1013.32	Contig1013	scaffold147	420762	426675	-	11.6305	9.1457	8.23168
CCA0014S0033	evm.TU.Contig1013.33	Contig1013	scaffold147	444756	445319	+	0	1.10459	0.848039
CCA0014S0034	evm.TU.Contig1013.34	Contig1013	scaffold147	445395	462409	-	31.664	31.7985	29.0123
CCA0014S0036	evm.TU.Contig1013.35_evm.TU.Contig1013.36	Contig1013	scaffold147	464277	468496	-	3.0234	1.52413	1.29771
CCA0014S0037	evm.TU.Contig1013.37	Contig1013	scaffold147	488229	488931	-	0.424361	0.41298	1.81802
CCA0014S0038	evm.TU.Contig1013.38	Contig1013	scaffold147	492140	497645	-	33.1608	25.2942	31.8186
CCA0014S0039	evm.TU.Contig1013.39	Contig1013	scaffold147	508346	518241	-	0.0312122	0.045511	0.112355
CCA0014S0040	evm.TU.Contig1013.40	Contig1013	scaffold147	519708	524524	-	5.19176	4.81377	6.22009
CCA0015S0001	evm.TU.Contig1014.1	Contig1014	scaffold157	31114	40247	-	0	0	0
CCA0016S0001	evm.TU.Contig1015.1	Contig1015	scaffold167	13622	21028	-	0.0838531	0.0651998	1.06945
CCA0016S0007	evm.TU.Contig1015.7	Contig1015	scaffold167	84269	95001	-	1.25832	0.282297	0.49769
CCA0016S0008	evm.TU.Contig1015.8	Contig1015	scaffold167	120422	122945	-	0.352343	0.0665602	1.15554
CCA0017S0001	evm.TU.Contig1016.1	Contig1016	scaffold178	1426	2250	+	0	0	0
CCA0017S0003	evm.TU.Contig1016.3	Contig1016	scaffold178	18823	23021	+	16.2883	15.0661	17.4164
CCA0017S0005	evm.TU.Contig1016.5	Contig1016	scaffold178	55096	55815	+	0	0	0
CCA0017S0007	evm.TU.Contig1016.7	Contig1016	scaffold178	99460	104165	-	0	0	0
CCA0017S0008	evm.TU.Contig1016.8	Contig1016	scaffold178	104877	105880	+	0	0.0409415	0.0432879
CCA0018S0001	evm.TU.Contig1017.1	Contig1017	scaffold189	31573	117392	-	1.11126	0.549914	1.999
CCA0018S0002	evm.TU.Contig1017.2	Contig1017	scaffold189	234	5439	-	0.570572	0.587483	1.64579
CCA0018S0004	evm.TU.Contig1017.4	Contig1017	scaffold189	28462	30325	-	1.24694	0.601949	2.77272
CCA0019S0001	evm.TU.Contig1018.1	Contig1018	scaffold200	4550	13592	+	48.573	39.0554	35.1964
CCA0020S0001	evm.TU.Contig1019.1	Contig1019	scaffold211	620	769	-	0	0	0
CCA0020S0002	evm.TU.Contig1019.2	Contig1019	scaffold211	1619	4987	-	1.77748	0.76619	2.13423
CCA0020S0003	evm.TU.Contig1019.3	Contig1019	scaffold211	4999	5214	-	4.18207	0	0
CCA0020S0004	evm.TU.Contig1019.4	Contig1019	scaffold211	8903	17967	-	0.307401	0.190711	0.235305
CCA0020S0005	evm.TU.Contig1019.5	Contig1019	scaffold211	31425	40869	+	0	0	0
CCA0021S0001	evm.TU.Contig1022.1	Contig1022	scaffold244	19657	21953	+	2.61195	0	1.07108
CCA0021S0003	evm.TU.Contig1022.3	Contig1022	scaffold244	64828	71716	+	0.616706	0.092244	0.0487885
CCA0022S0002	evm.TU.Contig1023.2	Contig1023	scaffold254	72179	74047	+	16.3129	16.2002	11.7548
CCA0022S0003	evm.TU.Contig1023.3	Contig1023	scaffold254	81062	88801	-	12.7214	4.71729	12.8065
CCA0023S0001	evm.TU.Contig1025.1	Contig1025	scaffold275	8972	12630	-	32.7336	29.0971	27.5025
CCA0023S0002	evm.TU.Contig1025.2	Contig1025	scaffold275	25072	25626	-	0	0	0
CCA0023S0003	evm.TU.Contig1025.3	Contig1025	scaffold275	44248	46800	-	14.5691	16.3576	17.1938
CCA0023S0004	evm.TU.Contig1025.4	Contig1025	scaffold275	68291	85949	+	7.08525	5.80271	9.47268
CCA0023S0005	evm.TU.Contig1025.5	Contig1025	scaffold275	92702	97151	-	122.837	61.0496	37.2438
CCA0023S0006	evm.TU.Contig1025.6	Contig1025	scaffold275	106385	120905	-	57.806	54.5474	36.5157
CCA0023S0008	evm.TU.Contig1025.8	Contig1025	scaffold275	131391	144658	-	9.20334	13.3472	17.8266
CCA0023S0012	evm.TU.Contig1025.12	Contig1025	scaffold275	183982	192300	-	34.7296	32.845	32.7452
CCA0023S0014	evm.TU.Contig1025.14	Contig1025	scaffold275	230232	251121	+	35.8078	49.6732	73.1818
CCA0024S0004	evm.TU.Contig1026.4	Contig1026	scaffold286	103264	105814	-	0	0.0148237	0.627531
CCA0024S0005	evm.TU.Contig1026.5	Contig1026	scaffold286	106010	108261	-	0	0	0.0707695
CCA0024S0006	evm.TU.Contig1026.6	Contig1026	scaffold286	108267	108723	-	0	0	0
CCA0025S0001	evm.TU.Contig1027.1	Contig1027	scaffold297	56765	58073	-	0	0	0
CCA0025S0002	evm.TU.Contig1027.2	Contig1027	scaffold297	86591	87823	-	0.862602	0.0729473	0.424254
CCA0026S0002	evm.TU.Contig1028.2	Contig1028	scaffold308	44229	44744	+	0	0	0
CCA0027S0001	evm.TU.Contig1030.1	Contig1030	scaffold331	21420	21808	-	0	0	0
CCA0028S0001	evm.TU.Contig1031.1	Contig1031	scaffold342	97	1112	-	0	0.854535	0.361249
CCA0029S0004	evm.TU.Contig1033.4	Contig1033	scaffold364	56999	65015	+	8.71167	6.53006	6.3376
CCA0030S0001	evm.TU.Contig1034.1	Contig1034	scaffold374	39642	40577	+	0	0	0
CCA0031S0001	evm.TU.Contig1035.1	Contig1035	scaffold384	85330	86327	+	0	0	0
CCA0032S0001	evm.TU.Contig1036.1	Contig1036	scaffold395	86179	87939	+	1.62695	2.79838	3.11054
CCA0033S0003	evm.TU.Contig1037.3	Contig1037	scaffold406	42811	45539	+	5.3125	3.99305	3.95126
CCA0033S0004	evm.TU.Contig1037.4	Contig1037	scaffold406	53632	55612	+	11.8788	15.1532	11.8306
CCA0033S0006	evm.TU.Contig1037.6	Contig1037	scaffold406	65598	68146	-	3.00877	3.60263	3.23519
CCA0034S0001	evm.TU.Contig1038.1	Contig1038	scaffold417	9892	10847	+	0.449997	0.350157	1.11059
CCA0035S0002	evm.TU.Contig1041.2	Contig1041	scaffold451	28873	29661	+	0	0	0
CCA0035S0003	evm.TU.Contig1041.3	Contig1041	scaffold451	32098	115784	+	7.10406	3.4093	8.13893
CCA0036S0001	evm.TU.Contig1042.1	Contig1042	scaffold462	14663	15551	-	18.9141	12.6376	8.15756
CCA0036S0002	evm.TU.Contig1042.2	Contig1042	scaffold462	18793	22777	-	0	0	0
CCA0036S0003	evm.TU.Contig1042.3	Contig1042	scaffold462	46595	47360	-	0	0	0
CCA0036S0004	evm.TU.Contig1042.4	Contig1042	scaffold462	69625	72304	-	19.1518	8.59082	15.4009
CCA0037S0001	evm.TU.Contig1046.1	Contig1046	scaffold506	59713	60669	+	0	11.1514	0
CCA0038S0003	evm.TU.Contig1047.3	Contig1047	scaffold517	67353	68490	+	0	0	0
CCA0039S0001	evm.TU.Contig1049.1	Contig1049	scaffold539	1047	3981	-	0	0	0
CCA0039S0003	evm.TU.Contig1049.3	Contig1049	scaffold539	44937	51531	-	13.0134	11.8804	5.10631
CCA0039S0004	evm.TU.Contig1049.4	Contig1049	scaffold539	103245	106946	-	6.11256	7.27155	9.2724
CCA0039S0006	evm.TU.Contig1049.6	Contig1049	scaffold539	119094	123246	-	6.69473	5.70595	8.42294
CCA0039S0007	evm.TU.Contig1049.7	Contig1049	scaffold539	138054	142498	-	12.3243	12.3592	9.06822
CCA0039S0010	evm.TU.Contig1049.10	Contig1049	scaffold539	208086	211198	-	0.76243	0.444775	0.392057
CCA0039S0011	evm.TU.Contig1049.11	Contig1049	scaffold539	214859	220407	-	58.1303	69.5229	70.7051
CCA0039S0012	evm.TU.Contig1049.12	Contig1049	scaffold539	223401	231382	-	10.8703	10.8449	11.2216
CCA0039S0013	evm.TU.Contig1049.13	Contig1049	scaffold539	246447	251450	+	0	0	0
CCA0039S0014	evm.TU.Contig1049.14	Contig1049	scaffold539	251790	254710	+	0.747201	0.825696	1.92104
CCA0039S0015	evm.TU.Contig1049.15	Contig1049	scaffold539	255371	257186	-	3.64117	4.41943	4.29336
CCA0039S0016	evm.TU.Contig1049.16	Contig1049	scaffold539	262203	266463	-	0	0	0
CCA0039S0017	evm.TU.Contig1049.17	Contig1049	scaffold539	267275	268810	-	56.8273	40.0349	44.766
CCA0039S0018	evm.TU.Contig1049.18	Contig1049	scaffold539	312348	312758	-	0	0	0
CCA0039S0019	evm.TU.Contig1049.19	Contig1049	scaffold539	338985	339395	-	0	0	0
CCA0040S0001	evm.TU.Contig1050.1	Contig1050	scaffold550	2249	96641	+	0.0298314	0.264343	0.132957
CCA0041S0004	evm.TU.Contig1059.4	Contig1059	scaffold646	83278	94898	+	29.3067	45.9771	38.3278
CCA0041S0006	evm.TU.Contig1059.6	Contig1059	scaffold646	116935	131241	+	11.638	8.08902	16.7488
CCA0041S0007	evm.TU.Contig1059.7	Contig1059	scaffold646	143325	144734	-	9.44785	53.582	10.1925
CCA0042S0001	evm.TU.Contig1062.1	Contig1062	scaffold680	32352	33251	-	0.19576	0.333243	0.554839
CCA0042S0002	evm.TU.Contig1062.2	Contig1062	scaffold680	38779	42059	+	136.863	284.893	107.501
CCA0042S0003	evm.TU.Contig1062.3	Contig1062	scaffold680	45870	64954	-	0.754929	0.733804	0.815274
CCA0043S0001	evm.TU.Contig1063.1	Contig1063	scaffold691	9977	51789	+	9.65659	11.0556	14.0572
CCA0044S0001	evm.TU.Contig1065.1	Contig1065	scaffold712	66771	69755	-	0	0	0
CCA0045S0001	evm.TU.Contig1066.1	Contig1066	scaffold723	21655	30589	+	0.565241	0.686624	0.581322
CCA0045S0002	evm.TU.Contig1066.2	Contig1066	scaffold723	33402	34304	+	0	0	0
CCA0046S0002	evm.TU.Contig1067.2	Contig1067	scaffold733	109549	110657	+	0.170537	0.166306	0.175251
CCA0046S0003	evm.TU.Contig1067.3	Contig1067	scaffold733	114413	119821	+	13.9641	10.7037	14.1541
CCA0047S0001	evm.TU.Contig1068.1	Contig1068	scaffold744	1	2003	+	0.0188372	0.183124	0.348724
CCA0048S0001	evm.TU.Contig1072.1	Contig1072	scaffold787	49092	51201	-	0.0406598	0.0197642	0.0627259
CCA0048S0003	evm.TU.Contig1072.3	Contig1072	scaffold787	76587	77568	+	0.780806	0	0.17843
CCA0048S0004	evm.TU.Contig1072.4	Contig1072	scaffold787	110746	186883	+	7.95931	6.99098	10.6533
CCA0048S0005	evm.TU.Contig1072.5	Contig1072	scaffold787	187069	188506	+	1.97322	1.89974	3.64174
CCA0048S0006	evm.TU.Contig1072.6	Contig1072	scaffold787	188519	189637	+	2.91171	2.34465	4.81881
CCA0048S0007	evm.TU.Contig1072.7	Contig1072	scaffold787	133312	135527	-	1.01983	0.4557	1.3289
CCA0048S0008	evm.TU.Contig1072.8	Contig1072	scaffold787	204932	208804	+	1.65581	0.630443	1.19163
CCA0048S0009	evm.TU.Contig1072.9	Contig1072	scaffold787	219981	221496	+	4.62161	0	0
CCA0049S0003	evm.TU.Contig1073.3	Contig1073	scaffold796	75705	79575	+	2.02751	0.156473	1.55554
CCA0049S0004	evm.TU.Contig1073.4	Contig1073	scaffold796	79600	81881	+	0.526407	0.165553	1.56053
CCA0049S0005	evm.TU.Contig1073.5	Contig1073	scaffold796	84313	86424	-	0	0.0480575	0
CCA0050S0001	evm.TU.Contig1074.1	Contig1074	scaffold807	2562	6025	+	4.1483	19.3493	14.1635
CCA0051S0001	evm.TU.Contig1075.1	Contig1075	scaffold818	14168	19006	+	2.98698	2.57309	3.23359
CCA0051S0002	evm.TU.Contig1075.2	Contig1075	scaffold818	36379	41342	+	5.35024	3.75766	7.76215
CCA0051S0003	evm.TU.Contig1075.3	Contig1075	scaffold818	41940	46381	-	50.0662	41.1219	73.5746
CCA0051S0004	evm.TU.Contig1075.4	Contig1075	scaffold818	48361	52638	-	15.5767	16.7242	9.90893
CCA0051S0005	evm.TU.Contig1075.5	Contig1075	scaffold818	55717	60146	-	28.0052	30.6255	20.4156
CCA0051S0006	evm.TU.Contig1075.6	Contig1075	scaffold818	76580	77422	-	0	0	0
CCA0051S0007	evm.TU.Contig1075.7	Contig1075	scaffold818	81755	83778	+	6.43273	20.635	7.20931
CCA0051S0008	evm.TU.Contig1075.8	Contig1075	scaffold818	86859	88994	+	2.33731	1.21425	6.65134
CCA0051S0009	evm.TU.Contig1075.9	Contig1075	scaffold818	90627	95454	+	40.8688	20.6927	34.0471
CCA0052S0002	evm.TU.Contig1076.2	Contig1076	scaffold829	36231	39056	-	1.71502	12.3214	8.04451
CCA0052S0003	evm.TU.Contig1076.3	Contig1076	scaffold829	68066	72850	-	0	0.0181919	0.153969
CCA0052S0004	evm.TU.Contig1076.4	Contig1076	scaffold829	77846	80479	-	0.0530245	0.515555	0.599854
CCA0052S0005	evm.TU.Contig1076.5	Contig1076	scaffold829	82031	111454	+	1.76662	5.46369	2.43661
CCA0052S0006	evm.TU.Contig1076.6	Contig1076	scaffold829	112065	122327	-	18.4977	10.9906	21.3042
CCA0052S0007	evm.TU.Contig1076.7	Contig1076	scaffold829	129030	134123	+	24.6276	28.073	88.6577
CCA0052S0008	evm.TU.Contig1076.8	Contig1076	scaffold829	196574	198870	+	0	0	0
CCA0052S0009	evm.TU.Contig1076.9	Contig1076	scaffold829	200565	200849	+	30.8683	86.8059	45.3014
CCA0053S0004	evm.TU.Contig1077.4	Contig1077	scaffold840	37043	42739	+	0.983431	1.06406	2.09931
CCA0053S0005	evm.TU.Contig1077.5	Contig1077	scaffold840	55332	57627	+	1.51262	3.13582	4.08001
CCA0053S0006	evm.TU.Contig1077.6	Contig1077	scaffold840	57704	58782	+	0.297335	0.144913	0.763973
CCA0053S0007	evm.TU.Contig1077.7	Contig1077	scaffold840	72544	73841	+	0.399892	0.195108	0
CCA0054S0001	evm.TU.Contig1078.1	Contig1078	scaffold851	18201	19321	-	0.0598984	0.0291395	0
CCA0054S0002	evm.TU.Contig1078.2	Contig1078	scaffold851	33626	34443	+	0	0	0
CCA0054S0003	evm.TU.Contig1078.3	Contig1078	scaffold851	72049	72292	+	0	0	0
CCA0055S0001	evm.TU.Contig10783.1	Contig10783	scaffold855	66	611	-	0	0	0
CCA0056S0001	evm.TU.Contig1079.1	Contig1079	scaffold862	816	1614	+	0.0258844	0	0.0532041
CCA0057S0001	evm.TU.Contig1080.1	Contig1080	scaffold874	64292	65245	-	7.83501	5.04118	17.9961
CCA0057S0005	evm.TU.Contig1080.5	Contig1080	scaffold874	168327	171741	-	9.06919	4.73436	11.03
CCA0057S0007	evm.TU.Contig1080.7	Contig1080	scaffold874	254865	255116	+	0	0	0
CCA0057S0008	evm.TU.Contig1080.8	Contig1080	scaffold874	255790	263621	+	0	0	0
CCA0057S0009	evm.TU.Contig1080.9	Contig1080	scaffold874	288223	298006	-	36.5249	44.2311	33.7097
CCA0058S0001	evm.TU.Contig1081.1	Contig1081	scaffold884	58490	62464	-	1.08213	0.649873	0.922979
CCA0058S0002	evm.TU.Contig1081.2	Contig1081	scaffold884	20	344	-	9.11853	0	4.35567
CCA0059S0001	evm.TU.Contig1084.1	Contig1084	scaffold916	1727	5133	+	0.281467	0.097706	0.0930522
CCA0059S0003	evm.TU.Contig1084.3	Contig1084	scaffold916	38415	39213	+	0	0	0
CCA0059S0005	evm.TU.Contig1084.5	Contig1084	scaffold916	61776	63657	+	0	0	0
CCA0059S0007	evm.TU.Contig1084.6_evm.TU.Contig1084.7	Contig1084	scaffold916	74368	78099	-	0.180087	0.123558	0.686417
CCA0059S0009	evm.TU.Contig1084.9	Contig1084	scaffold916	85865	86832	-	0	0	0
CCA0059S0011	evm.TU.Contig1084.11	Contig1084	scaffold916	99476	105983	-	0	0	0
CCA0060S0001	evm.TU.Contig1085.1	Contig1085	scaffold927	22533	25316	-	36.3003	45.5077	19.6023
CCA0060S0004	evm.TU.Contig1085.4	Contig1085	scaffold927	81632	88283	-	10.5983	3.35117	6.51881
CCA0061S0001	evm.TU.Contig10850.1	Contig10850	scaffold928	992	1416	-	0	0	0
CCA0062S0001	evm.TU.Contig1086.1	Contig1086	scaffold936	18199	26653	+	117.873	85.4438	72.7193
CCA0062S0004	evm.TU.Contig1086.4	Contig1086	scaffold936	90811	93277	+	0.291548	0.510275	2.75855
CCA0063S0001	evm.TU.Contig1087.1	Contig1087	scaffold946	7529	7696	+	0	0	0
CCA0063S0002	evm.TU.Contig1087.2	Contig1087	scaffold946	13492	16272	+	3.26245	8.80793	7.60004
CCA0063S0003	evm.TU.Contig1087.3	Contig1087	scaffold946	16119	16993	-	106.585	397.663	283.242
CCA0063S0004	evm.TU.Contig1087.4	Contig1087	scaffold946	19029	26370	+	4.00737	3.83282	7.61698
CCA0063S0005	evm.TU.Contig1087.5	Contig1087	scaffold946	28539	31714	+	42.1079	80.6813	26.092
CCA0063S0006	evm.TU.Contig1087.6	Contig1087	scaffold946	35428	35799	-	0	0	0
CCA0063S0007	evm.TU.Contig1087.7	Contig1087	scaffold946	38722	41279	-	0.48193	0.987062	0.824057
CCA0063S0008	evm.TU.Contig1087.8	Contig1087	scaffold946	46982	49750	+	20.6338	9.16175	27.6896
CCA0063S0009	evm.TU.Contig1087.9	Contig1087	scaffold946	50534	56791	-	9.81048	127.894	49.2115
CCA0063S0010	evm.TU.Contig1087.10	Contig1087	scaffold946	71965	80102	+	20.1622	9.87318	22.3967
CCA0063S0011	evm.TU.Contig1087.11	Contig1087	scaffold946	81476	85551	+	75.9168	79.6919	71.8762
CCA0064S0002	evm.TU.Contig1088.2	Contig1088	scaffold957	124274	125273	+	0	0	0
CCA0064S0003	evm.TU.Contig1088.3	Contig1088	scaffold957	125292	127425	+	0	1.09236	2.46489
CCA0064S0004	evm.TU.Contig1088.4	Contig1088	scaffold957	138989	139222	+	0	0	0
CCA0065S0004	evm.TU.Contig1089.4	Contig1089	scaffold967	27310	27657	+	6.42911	21.3393	93.899
CCA0065S0005	evm.TU.Contig1089.5	Contig1089	scaffold967	28578	29448	+	0.0629082	0	0.90558
CCA0065S0006	evm.TU.Contig1089.6	Contig1089	scaffold967	32385	33092	+	0.93594	11.7382	15.7542
CCA0065S0007	evm.TU.Contig1089.7	Contig1089	scaffold967	34269	37435	-	1.6328	0.537688	0.893937
CCA0065S0009	evm.TU.Contig1089.9	Contig1089	scaffold967	46663	48029	+	10.7356	4.9621	19.5249
CCA0065S0010	evm.TU.Contig1089.10	Contig1089	scaffold967	63264	63698	+	0	0	0
CCA0066S0001	evm.TU.Contig1090.1	Contig1090	scaffold979	28525	30378	+	0	0.0549557	0
CCA0067S0001	evm.TU.Contig10901.1	Contig10901	scaffold981	284	529	+	0	0	0
CCA0068S0001	evm.TU.Contig10908.1	Contig10908	scaffold988	17232	17545	-	0	0	0
CCA0069S0001	evm.TU.Contig1091.1	Contig1091	scaffold990	60250	61298	+	0.971995	0.951197	0.998259
CCA0069S0002	evm.TU.Contig1091.2	Contig1091	scaffold990	62062	63788	+	0	0.15602	0.498517
CCA0069S0003	evm.TU.Contig1091.3	Contig1091	scaffold990	73017	74707	-	12.9523	21.994	3.06022
CCA0069S0004	evm.TU.Contig1091.4	Contig1091	scaffold990	82110	96085	+	18.7353	10.5225	11.2806
CCA0069S0005	evm.TU.Contig1091.5	Contig1091	scaffold990	96675	100193	-	74.1222	94.4622	41.2008
CCA0069S0006	evm.TU.Contig1091.6	Contig1091	scaffold990	103474	104472	-	351.497	369.487	183.606
CCA0069S0007	evm.TU.Contig1091.7	Contig1091	scaffold990	106868	107588	+	0	0	0
CCA0069S0008	evm.TU.Contig1091.8	Contig1091	scaffold990	110612	118354	-	0	0	0
CCA0069S0009	evm.TU.Contig1091.9	Contig1091	scaffold990	122220	123447	-	0	0.880782	1.66338
CCA0069S0010	evm.TU.Contig1091.10	Contig1091	scaffold990	135081	136079	-	0	0	0.174324
CCA0069S0011	evm.TU.Contig1091.11	Contig1091	scaffold990	139835	158693	-	20.3478	15.0497	23.4327
CCA0069S0012	evm.TU.Contig1091.12	Contig1091	scaffold990	4354	5333	-	4.31091	16.2418	5.94096
CCA0070S0001	evm.TU.Contig1092.1	Contig1092	scaffold1001	1859	2224	-	8.40408	28.0261	3.95819
CCA0070S0002	evm.TU.Contig1092.2	Contig1092	scaffold1001	2843	3895	-	8.85945	14.3135	2.76162
CCA0071S0001	evm.TU.Contig10922.1	Contig10922	scaffold1004	207	372	-	0	0	0
CCA0072S0001	evm.TU.Contig1093.1	Contig1093	scaffold1012	21637	22482	-	0	0	0
CCA0072S0002	evm.TU.Contig1093.2	Contig1093	scaffold1012	30056	36317	-	0.0592184	0	0.121783
CCA0072S0003	evm.TU.Contig1093.3	Contig1093	scaffold1012	45867	55402	-	0	0.148449	0
CCA0073S0001	evm.TU.Contig1094.1	Contig1094	scaffold1022	2260	2713	-	0.334353	0.654568	0.686757
CCA0073S0002	evm.TU.Contig1094.2	Contig1094	scaffold1022	50297	52778	-	0	0.26702	0
CCA0074S0001	evm.TU.Contig1095.1	Contig1095	scaffold1033	6928	7380	+	0	0	0
CCA0075S0001	evm.TU.Contig1096.1	Contig1096	scaffold1044	17957	21772	+	1.58328	0.0989318	1.46559
CCA0075S0006	evm.TU.Contig1096.6	Contig1096	scaffold1044	2796	3037	+	2.40836	0	0
CCA0076S0001	evm.TU.Contig1097.1	Contig1097	scaffold1055	22879	33635	+	0.282727	0.117148	0.412892
CCA0076S0002	evm.TU.Contig1097.2	Contig1097	scaffold1055	16657	17588	+	0	0	0
CCA0077S0001	evm.TU.Contig1098.1	Contig1098	scaffold1064	4931	5519	+	0	0	0
CCA0078S0001	evm.TU.Contig1099.1	Contig1099	scaffold1075	3961	4973	+	0.956597	0.444966	1.50862
CCA0079S0001	evm.TU.Contig1102.1	Contig1102	scaffold1110	25089	26514	+	6.70206	6.84645	6.8487
CCA0080S0001	evm.TU.Contig1103.1	Contig1103	scaffold1121	867	1118	-	0	0	0
CCA0081S0001	evm.TU.Contig1104.1	Contig1104	scaffold1132	53130	58603	+	0.229662	0	0.0262436
CCA0081S0002	evm.TU.Contig1104.2	Contig1104	scaffold1132	63574	67189	-	1.24332	6.68126	5.02181
CCA0081S0003	evm.TU.Contig1104.3	Contig1104	scaffold1132	68390	71061	-	3.18694	1.43947	3.89024
CCA0081S0004	evm.TU.Contig1104.4	Contig1104	scaffold1132	80940	83744	-	0	0	0
CCA0081S0005	evm.TU.Contig1104.5	Contig1104	scaffold1132	1890	2273	+	0	0	0
CCA0081S0007	evm.TU.Contig1104.7	Contig1104	scaffold1132	16367	16801	+	0	0	0
CCA0082S0003	evm.TU.Contig1105.3	Contig1105	scaffold1143	18320	28506	+	49.16	21.5463	64.3057
CCA0082S0004	evm.TU.Contig1105.4	Contig1105	scaffold1143	29244	32284	-	3.38814	6.32391	3.18375
CCA0082S0005	evm.TU.Contig1105.5	Contig1105	scaffold1143	33179	36667	-	7.11809	3.1215	3.00383
CCA0082S0006	evm.TU.Contig1105.6	Contig1105	scaffold1143	38289	40804	+	13.5049	14.8489	12.5995
CCA0082S0007	evm.TU.Contig1105.7	Contig1105	scaffold1143	45383	51526	+	2.33907	1.37681	2.5795
CCA0082S0008	evm.TU.Contig1105.8	Contig1105	scaffold1143	53292	54835	-	0	0	0
CCA0082S0010	evm.TU.Contig1105.10	Contig1105	scaffold1143	66204	71404	-	12.3082	11.6902	5.14152
CCA0082S0011	evm.TU.Contig1105.11	Contig1105	scaffold1143	72219	74658	-	0.0861612	1.61923	2.82097
CCA0082S0012	evm.TU.Contig1105.12	Contig1105	scaffold1143	81207	83064	-	0	0	0
CCA0082S0014	evm.TU.Contig1105.14	Contig1105	scaffold1143	98133	100528	+	42.888	17.4985	38.2356
CCA0082S0015	evm.TU.Contig1105.15	Contig1105	scaffold1143	102166	111856	-	2.06502	2.65643	5.47029
CCA0082S0016	evm.TU.Contig1105.16	Contig1105	scaffold1143	115555	125345	+	11.6122	12.1447	11.3572
CCA0082S0017	evm.TU.Contig1105.17	Contig1105	scaffold1143	126103	128240	+	4.6764	2.55064	2.45986
CCA0082S0018	evm.TU.Contig1105.18	Contig1105	scaffold1143	128362	137499	-	25.6651	20.4633	22.3789
CCA0082S0019	evm.TU.Contig1105.19	Contig1105	scaffold1143	141575	143846	-	20.4696	13.3858	17.0543
CCA0082S0020	evm.TU.Contig1105.20	Contig1105	scaffold1143	145378	147975	-	51.1577	20.1193	78.9905
CCA0083S0001	evm.TU.Contig1107.1	Contig1107	scaffold1165	6451	18589	-	26.7271	22.4733	24.3968
CCA0084S0001	evm.TU.Contig11074.1	Contig11074	scaffold1170	246	1437	-	0	0	0
CCA0085S0001	evm.TU.Contig1108.1	Contig1108	scaffold1176	3429	15230	+	15.2716	10.2943	19.3689
CCA0086S0001	evm.TU.Contig1109.1	Contig1109	scaffold1187	12307	12792	+	0	0	0
CCA0086S0004	evm.TU.Contig1109.4	Contig1109	scaffold1187	39165	39805	+	0	0	0
CCA0086S0005	evm.TU.Contig1109.5	Contig1109	scaffold1187	44931	51289	+	55.2837	46.5744	45.2528
CCA0086S0006	evm.TU.Contig1109.6	Contig1109	scaffold1187	52454	55991	+	0	0	0
CCA0086S0007	evm.TU.Contig1109.7	Contig1109	scaffold1187	57087	62942	+	49.711	58.2377	40.1123
CCA0086S0008	evm.TU.Contig1109.8	Contig1109	scaffold1187	63518	66919	-	15.8727	20.2095	21.1501
CCA0086S0009	evm.TU.Contig1109.9	Contig1109	scaffold1187	69248	73171	-	65.8937	279.594	130.838
CCA0086S0010	evm.TU.Contig1109.10	Contig1109	scaffold1187	76465	88175	-	2.22923	5.69564	5.17437
CCA0086S0011	evm.TU.Contig1109.11	Contig1109	scaffold1187	92218	95158	+	14.6537	10.7552	12.9891
CCA0086S0012	evm.TU.Contig1109.12	Contig1109	scaffold1187	96956	101147	-	29.6322	9.67813	27.2299
CCA0086S0013	evm.TU.Contig1109.13	Contig1109	scaffold1187	111345	113406	+	3.00899	2.69538	103.701
CCA0086S0014	evm.TU.Contig1109.14	Contig1109	scaffold1187	125784	127199	+	0.0598984	1.45697	36.8311
CCA0087S0001	evm.TU.Contig1111.1	Contig1111	scaffold1209	842	1218	-	0	0	0
CCA0088S0002	evm.TU.Contig1114.2	Contig1114	scaffold1242	120566	123073	-	12.6916	13.4782	31.4495
CCA0088S0003	evm.TU.Contig1114.3	Contig1114	scaffold1242	130379	130798	-	4.11993	2.48852	6.04754
CCA0089S0001	evm.TU.Contig11143.1	Contig11143	scaffold1246	5694	7266	+	1.20252	0	1.73944
CCA0090S0001	evm.TU.Contig1115.1	Contig1115	scaffold1253	20889	21491	+	0	0	0
CCA0090S0002	evm.TU.Contig1115.2	Contig1115	scaffold1253	44434	49903	+	1.92523	1.48374	1.42707
CCA0090S0003	evm.TU.Contig1115.3	Contig1115	scaffold1253	48253	48570	+	0	0	1.10615
CCA0090S0004	evm.TU.Contig1115.4	Contig1115	scaffold1253	51833	58044	-	2.73579	1.97133	3.74234
CCA0090S0005	evm.TU.Contig1115.5	Contig1115	scaffold1253	60848	62225	-	40.4764	523.504	180.095
CCA0090S0007	evm.TU.Contig1115.7	Contig1115	scaffold1253	77231	78115	+	112.409	201.048	94.3587
CCA0090S0008	evm.TU.Contig1115.8	Contig1115	scaffold1253	82754	87884	+	44.0264	79.1611	62.5421
CCA0090S0009	evm.TU.Contig1115.9	Contig1115	scaffold1253	88326	100471	-	3.9688	2.74559	6.17017
CCA0090S0010	evm.TU.Contig1115.10	Contig1115	scaffold1253	101705	107501	-	30.3142	17.911	18.4291
CCA0090S0011	evm.TU.Contig1115.11	Contig1115	scaffold1253	108255	110506	+	0	0	0
CCA0090S0012	evm.TU.Contig1115.12	Contig1115	scaffold1253	111927	112238	-	380.215	3238.62	1035.28
CCA0090S0013	evm.TU.Contig1115.13	Contig1115	scaffold1253	125300	131081	-	13.7755	22.0935	17.6097
CCA0090S0014	evm.TU.Contig1115.14	Contig1115	scaffold1253	134488	136282	-	0	0	0
CCA0090S0015	evm.TU.Contig1115.15	Contig1115	scaffold1253	136373	137613	-	0	0	0
CCA0090S0016	evm.TU.Contig1115.16	Contig1115	scaffold1253	137678	138073	-	0	0	0
CCA0090S0017	evm.TU.Contig1115.17	Contig1115	scaffold1253	143838	154407	-	24.0076	9.43697	15.3879
CCA0090S0018	evm.TU.Contig1115.18	Contig1115	scaffold1253	154134	154489	+	2.69911	5.45358	2.57207
CCA0091S0004	evm.TU.Contig1116.4	Contig1116	scaffold1264	99606	102536	-	0	0	0
CCA0092S0001	evm.TU.Contig1117.1	Contig1117	scaffold1274	9851	11235	-	0.0489765	0	0
CCA0092S0002	evm.TU.Contig1117.2	Contig1117	scaffold1274	16153	16488	-	110.829	55.9778	100.207
CCA0093S0001	evm.TU.Contig1122.1	Contig1122	scaffold1329	9199	12845	+	2.79234	1.1685	3.59454
CCA0093S0002	evm.TU.Contig1122.2	Contig1122	scaffold1329	13514	13936	-	0	0	0
CCA0094S0002	evm.TU.Contig1123.2	Contig1123	scaffold1340	26527	29381	+	12.3435	6.45037	11.7521
CCA0095S0002	evm.TU.Contig1125.2	Contig1125	scaffold1362	20172	28326	-	0	0	0
CCA0095S0004	evm.TU.Contig1125.4	Contig1125	scaffold1362	54681	79308	+	15.2666	12.4699	21.768
CCA0095S0005	evm.TU.Contig1125.5	Contig1125	scaffold1362	90215	95938	+	13.9516	2.74869	4.89331
CCA0095S0006	evm.TU.Contig1125.6	Contig1125	scaffold1362	103313	106809	+	24.4713	61.6968	32.0153
CCA0095S0007	evm.TU.Contig1125.7	Contig1125	scaffold1362	108158	112340	-	22.2369	22.3889	39.9885
CCA0095S0008	evm.TU.Contig1125.8	Contig1125	scaffold1362	112383	113825	-	17.442	13.1244	27.3561
CCA0096S0001	evm.TU.Contig1126.1	Contig1126	scaffold1372	31603	31818	-	0	0	0
CCA0097S0001	evm.TU.Contig11285.1	Contig11285	scaffold1399	47	254	+	0	0	0
CCA0098S0001	evm.TU.Contig1129.1	Contig1129	scaffold1404	71701	73155	-	0	0	0
CCA0099S0003	evm.TU.Contig1130.3	Contig1130	scaffold1416	131492	132513	-	0	0	0
CCA0100S0002	evm.TU.Contig1131.2	Contig1131	scaffold1427	44600	102223	+	10.9239	5.94707	9.79557
CCA0101S0001	evm.TU.Contig1132.1	Contig1132	scaffold1438	1447	8781	-	2.35585	5.78985	6.28492
CCA0101S0002	evm.TU.Contig1132.2	Contig1132	scaffold1438	27213	30465	+	0.16864	0	0.693781
CCA0101S0003	evm.TU.Contig1132.3	Contig1132	scaffold1438	45989	55029	-	36.6788	18.7203	18.9824
CCA0102S0003	evm.TU.Contig1134.3	Contig1134	scaffold1459	4260	8979	-	3.28522	2.00474	1.68948
CCA0102S0005	evm.TU.Contig1134.5	Contig1134	scaffold1459	69241	73778	-	0.393884	0.209442	0.680579
CCA0103S0001	evm.TU.Contig1139.1	Contig1139	scaffold1512	3732	6230	+	0.168237	1.1356	0.743556
CCA0103S0002	evm.TU.Contig1139.2	Contig1139	scaffold1512	8264	10893	+	0.0626266	0	0.418636
CCA0103S0003	evm.TU.Contig1139.3	Contig1139	scaffold1512	36513	40883	+	6.96217	3.68452	1.30488
CCA0103S0004	evm.TU.Contig1139.4	Contig1139	scaffold1512	75747	76583	-	0.0549193	0.215029	0.196573
CCA0104S0001	evm.TU.Contig1141.1	Contig1141	scaffold1533	3342	4085	+	0	0	0
CCA0104S0002	evm.TU.Contig1141.2	Contig1141	scaffold1533	34690	38448	+	0	0	0
CCA0104S0003	evm.TU.Contig1141.3	Contig1141	scaffold1533	43394	45932	+	129.011	34.7421	96.5692
CCA0105S0001	evm.TU.Contig1142.1	Contig1142	scaffold1544	47699	49410	+	1.03722	0.504578	0.740925
CCA0105S0002	evm.TU.Contig1142.2	Contig1142	scaffold1544	52496	54207	-	0.28806	0.114371	0.179229
CCA0106S0001	evm.TU.Contig1143.1	Contig1143	scaffold1555	5701	8956	-	5.67282	6.84704	4.96512
CCA0106S0003	evm.TU.Contig1143.3	Contig1143	scaffold1555	145674	147983	-	16.0041	9.23331	7.53898
CCA0106S0004	evm.TU.Contig1143.4	Contig1143	scaffold1555	162793	167097	+	12.0475	5.54844	8.36593
CCA0106S0005	evm.TU.Contig1143.5	Contig1143	scaffold1555	167345	167980	+	0	0	0
CCA0107S0002	evm.TU.Contig1144.2	Contig1144	scaffold1566	67169	67323	-	0	0	0
CCA0108S0001	evm.TU.Contig1145.1	Contig1145	scaffold1575	12361	13660	-	0	0.26702	0.561236
CCA0108S0002	evm.TU.Contig1145.2	Contig1145	scaffold1575	14308	16500	-	9.82148	14.7187	21.4114
CCA0108S0003	evm.TU.Contig1145.3	Contig1145	scaffold1575	17957	22892	-	0.975355	3.17764	9.37849
CCA0108S0004	evm.TU.Contig1145.4	Contig1145	scaffold1575	26639	32126	+	1.49211	0.980728	2.00229
CCA0108S0005	evm.TU.Contig1145.5	Contig1145	scaffold1575	32646	36857	+	12.4385	8.74098	10.0351
CCA0108S0006	evm.TU.Contig1145.6	Contig1145	scaffold1575	52284	57738	+	13.1991	13.0639	19.6007
CCA0108S0007	evm.TU.Contig1145.7	Contig1145	scaffold1575	60160	65584	+	17.2134	22.1245	21.4225
CCA0108S0008	evm.TU.Contig1145.8	Contig1145	scaffold1575	66646	67575	-	0.0934944	0.272826	0.0480712
CCA0108S0009	evm.TU.Contig1145.9	Contig1145	scaffold1575	70578	71388	+	0	0	0
CCA0108S0010	evm.TU.Contig1145.10	Contig1145	scaffold1575	73526	74416	+	0	0.0482864	0
CCA0108S0011	evm.TU.Contig1145.11	Contig1145	scaffold1575	76940	78580	+	127.014	16.7814	271.95
CCA0108S0013	evm.TU.Contig1145.13	Contig1145	scaffold1575	92282	100297	+	9.34491	10.0758	7.82695
CCA0108S0014	evm.TU.Contig1145.14	Contig1145	scaffold1575	101376	103695	-	30.8093	11.3284	17.2275
CCA0108S0015	evm.TU.Contig1145.15	Contig1145	scaffold1575	116553	118225	-	11.8777	1.89171	3.72915
CCA0108S0016	evm.TU.Contig1145.16	Contig1145	scaffold1575	124427	126466	-	7.49885	4.6198	4.82735
CCA0108S0017	evm.TU.Contig1145.17	Contig1145	scaffold1575	127478	135203	-	12.6373	7.78537	9.06336
CCA0108S0018	evm.TU.Contig1145.18	Contig1145	scaffold1575	136566	139611	-	39.4582	38.3375	68.5155
CCA0108S0019	evm.TU.Contig1145.19	Contig1145	scaffold1575	140111	143731	-	0	0.535876	0.19616
CCA0108S0020	evm.TU.Contig1145.20	Contig1145	scaffold1575	149260	149583	+	8.33795	14.4612	3.01914
CCA0108S0021	evm.TU.Contig1145.21	Contig1145	scaffold1575	149682	150986	+	9.47797	7.76626	2.99072
CCA0108S0022	evm.TU.Contig1145.22	Contig1145	scaffold1575	151769	152626	+	12.5712	11.6689	3.33944
CCA0108S0023	evm.TU.Contig1145.23	Contig1145	scaffold1575	167462	168561	-	0	0.253794	0.0766778
CCA0108S0025	evm.TU.Contig1145.25	Contig1145	scaffold1575	174702	178921	+	50.3184	36.7204	42.6952
CCA0108S0026	evm.TU.Contig1145.26	Contig1145	scaffold1575	180380	185442	+	14.0354	12.7362	12.7075
CCA0108S0027	evm.TU.Contig1145.27	Contig1145	scaffold1575	186917	187852	+	0	0	0
CCA0108S0028	evm.TU.Contig1145.28	Contig1145	scaffold1575	190999	191406	+	0	0	0
CCA0108S0029	evm.TU.Contig1145.29	Contig1145	scaffold1575	199250	217098	-	5.05643	5.01039	7.86565
CCA0109S0003	evm.TU.Contig1146.3	Contig1146	scaffold1586	53644	54891	+	0.158469	0.061638	0.260752
CCA0110S0001	evm.TU.Contig1147.1	Contig1147	scaffold1597	903	7871	-	0	0	0
CCA0110S0002	evm.TU.Contig1147.2	Contig1147	scaffold1597	27991	31346	+	38.9633	19.3142	30.5165
CCA0110S0003	evm.TU.Contig1147.3	Contig1147	scaffold1597	36179	38560	-	5.30189	5.60069	5.73665
CCA0111S0001	evm.TU.Contig1148.1	Contig1148	scaffold1608	8966	9147	-	0	0	0
CCA0112S0001	evm.TU.Contig1149.1	Contig1149	scaffold1618	6772	8459	+	0.167482	0.403005	0.401133
CCA0112S0002	evm.TU.Contig1149.2	Contig1149	scaffold1618	17014	18701	+	0.144644	0.32391	0.377991
CCA0112S0004	evm.TU.Contig1149.4	Contig1149	scaffold1618	114166	119402	-	0.377139	0.042623	0.126293
CCA0112S0005	evm.TU.Contig1149.5	Contig1149	scaffold1618	120699	123106	-	0	0	0
CCA0113S0001	evm.TU.Contig1152.1	Contig1152	scaffold1651	11790	13869	-	1.88169	1.24173	4.30461
CCA0113S0003	evm.TU.Contig1152.3	Contig1152	scaffold1651	46054	46989	-	0.631494	0	1.28953
CCA0114S0001	evm.TU.Contig1153.1	Contig1153	scaffold1662	872	6695	-	0.131915	0.577638	0.0678184
CCA0114S0003	evm.TU.Contig1153.3	Contig1153	scaffold1662	36380	36997	+	0	0	0
CCA0115S0002	evm.TU.Contig1155.2	Contig1155	scaffold1684	7679	11160	-	4.91987	1.23245	10.6693
CCA0116S0001	evm.TU.Contig11558.1	Contig11558	scaffold1692	458	754	-	0	0	0
CCA0117S0001	evm.TU.Contig1157.1	Contig1157	scaffold1705	1329	3727	+	0.19245	0.0468004	0.0989496
CCA0118S0001	evm.TU.Contig1158.1	Contig1158	scaffold1716	9044	16248	+	8.33029	8.76065	11.605
CCA0119S0003	evm.TU.Contig1159.3	Contig1159	scaffold1727	50038	51067	+	0	0	0
CCA0119S0005	evm.TU.Contig1159.5	Contig1159	scaffold1727	63165	63955	+	0	0	0
CCA0120S0001	evm.TU.Contig11591.1	Contig11591	scaffold1729	2892	3177	-	0	0	0
CCA0121S0001	evm.TU.Contig11595.1	Contig11595	scaffold1733	388	1934	-	0.92134	0.0813484	0.0859182
CCA0122S0001	evm.TU.Contig1161.1	Contig1161	scaffold1748	25626	26806	-	0.850015	8.1309	159.056
CCA0122S0002	evm.TU.Contig1161.2	Contig1161	scaffold1748	32988	34402	-	0	0	0
CCA0122S0003	evm.TU.Contig1161.3	Contig1161	scaffold1748	34465	36469	-	0	0	0
CCA0122S0004	evm.TU.Contig1161.4	Contig1161	scaffold1748	43780	45171	+	0	0	0
CCA0123S0004	evm.TU.Contig1162.4	Contig1162	scaffold1758	66732	67160	-	0	0	0
CCA0124S0001	evm.TU.Contig1163.1	Contig1163	scaffold1769	6736	11257	+	3.71983	4.24697	5.29596
CCA0124S0003	evm.TU.Contig1163.3	Contig1163	scaffold1769	47982	54589	-	3.46127	2.83915	4.41708
CCA0124S0004	evm.TU.Contig1163.4	Contig1163	scaffold1769	59579	60680	+	0	0.041331	0.0436992
CCA0125S0001	evm.TU.Contig1164.1	Contig1164	scaffold1779	2469	3034	+	0	0	0
CCA0125S0002	evm.TU.Contig1164.2	Contig1164	scaffold1779	10384	11640	+	0.29064	0.0905517	2.77369
CCA0126S0001	evm.TU.Contig1165.1	Contig1165	scaffold1790	22701	24920	-	0.971829	0.687453	2.45299
CCA0126S0002	evm.TU.Contig1165.2	Contig1165	scaffold1790	25007	26069	-	2.22254	3.41923	3.49068
CCA0126S0003	evm.TU.Contig1165.3	Contig1165	scaffold1790	33416	36255	-	0.758146	0	0
CCA0126S0004	evm.TU.Contig1165.4	Contig1165	scaffold1790	42693	48059	+	5.34929	4.21737	6.4955
CCA0126S0005	evm.TU.Contig1165.5	Contig1165	scaffold1790	57821	60652	-	19.3933	24.0482	13.1776
CCA0126S0006	evm.TU.Contig1165.6	Contig1165	scaffold1790	71253	82711	+	2.09763	11.8822	5.26186
CCA0126S0007	evm.TU.Contig1165.7	Contig1165	scaffold1790	84886	86302	-	10.0869	7.14328	5.02397
CCA0126S0008	evm.TU.Contig1165.8	Contig1165	scaffold1790	89948	94596	+	8.07522	6.5263	6.86848
CCA0127S0001	evm.TU.Contig1166.1	Contig1166	scaffold1801	8544	8989	-	0	0	0
CCA0128S0001	evm.TU.Contig1168.1	Contig1168	scaffold1820	3006	38232	+	0.408032	0.97238	0.84511
CCA0128S0002	evm.TU.Contig1168.2	Contig1168	scaffold1820	56842	69212	+	17.5925	9.90964	10.0875
CCA0128S0003	evm.TU.Contig1168.3	Contig1168	scaffold1820	69273	71273	-	0	0	0
CCA0129S0001	evm.TU.Contig1169.1	Contig1169	scaffold1831	28475	32310	+	0	0	0
CCA0129S0002	evm.TU.Contig1169.2	Contig1169	scaffold1831	43108	62045	+	8.03171	6.98187	7.25811
CCA0129S0003	evm.TU.Contig1169.3	Contig1169	scaffold1831	63342	65853	+	0.846582	162.158	43.2001
CCA0129S0004	evm.TU.Contig1169.4	Contig1169	scaffold1831	67013	70379	-	16.4467	37.5335	27.1049
CCA0130S0001	evm.TU.Contig11705.1	Contig11705	scaffold1848	782	982	+	0	0	0
CCA0131S0001	evm.TU.Contig1172.1	Contig1172	scaffold1864	21828	33501	-	0	0	0
CCA0132S0002	evm.TU.Contig1178.2	Contig1178	scaffold1929	6181	33262	+	0.0879756	0.38506	0.452343
CCA0132S0003	evm.TU.Contig1178.3	Contig1178	scaffold1929	45403	56032	-	4.23041	1.34374	1.70554
CCA0133S0001	evm.TU.Contig1180.1	Contig1180	scaffold1951	141	883	+	0	0	0
CCA0133S0003	evm.TU.Contig1180.3	Contig1180	scaffold1951	29581	37651	-	0	0	0
CCA0133S0004	evm.TU.Contig1180.4	Contig1180	scaffold1951	49377	52864	+	0	0	0
CCA0133S0005	evm.TU.Contig1180.5	Contig1180	scaffold1951	58650	58939	-	0.923138	23.7724	12.0738
CCA0133S0006	evm.TU.Contig1180.6	Contig1180	scaffold1951	69412	69984	+	91.5343	77.8209	43.2406
CCA0133S0007	evm.TU.Contig1180.7	Contig1180	scaffold1951	70763	71917	+	14.5904	10.684	9.64319
CCA0133S0008	evm.TU.Contig1180.8	Contig1180	scaffold1951	72395	74130	+	18.095	9.80339	13.6614
CCA0133S0009	evm.TU.Contig1180.9	Contig1180	scaffold1951	74170	74505	+	13.6469	8.51836	12.3136
CCA0134S0001	evm.TU.Contig1182.1	Contig1182	scaffold1973	23687	31161	+	7.83242	4.05222	7.80885
CCA0134S0003	evm.TU.Contig1182.3	Contig1182	scaffold1973	111223	112617	-	2.31733	3.80894	1.73066
CCA0135S0001	evm.TU.Contig1183.1	Contig1183	scaffold1984	174	3747	+	32.8115	34.2561	30.1264
CCA0136S0001	evm.TU.Contig1187.1	Contig1187	scaffold2028	16162	16954	+	0	0	0
CCA0137S0001	evm.TU.Contig1188.1	Contig1188	scaffold2039	58298	59312	+	0.0829619	0.0403441	0
CCA0138S0002	evm.TU.Contig1189.2	Contig1189	scaffold2050	26298	36193	-	0	0	0
CCA0138S0004	evm.TU.Contig1189.4	Contig1189	scaffold2050	61487	61975	+	2.48541	1.05512	2.54067
CCA0138S0006	evm.TU.Contig1189.6	Contig1189	scaffold2050	79778	85531	+	3.33104	5.11819	5.82915
CCA0138S0007	evm.TU.Contig1189.7	Contig1189	scaffold2050	115121	116503	+	0	0	0
CCA0138S0008	evm.TU.Contig1189.8	Contig1189	scaffold2050	145670	147056	-	8.69069	0.0713222	0.113131
CCA0139S0001	evm.TU.Contig1191.1	Contig1191	scaffold2072	114	2832	-	0	0	0
CCA0140S0001	evm.TU.Contig1192.1	Contig1192	scaffold2083	73967	79060	-	51.8097	21.9124	37.4745
CCA0141S0002	evm.TU.Contig1193.2	Contig1193	scaffold2094	17968	19859	+	34.7687	42.2854	26.1992
CCA0141S0003	evm.TU.Contig1193.3	Contig1193	scaffold2094	30941	32873	-	35.4764	47.1657	18.822
CCA0142S0002	evm.TU.Contig1194.2	Contig1194	scaffold2105	6778	6966	-	0	0	0
CCA0142S0004	evm.TU.Contig1194.4	Contig1194	scaffold2105	17096	17479	+	0.506635	0.773374	1.04088
CCA0142S0005	evm.TU.Contig1194.5	Contig1194	scaffold2105	17517	21378	+	0.624916	2.14666	2.09612
CCA0143S0001	evm.TU.Contig1195.1	Contig1195	scaffold2116	17315	57577	+	24.5992	29.0944	25.6021
CCA0143S0002	evm.TU.Contig1195.2	Contig1195	scaffold2116	66981	80918	+	21.9133	45.1647	21.1679
CCA0143S0003	evm.TU.Contig1195.3	Contig1195	scaffold2116	81415	87096	-	18.6093	9.79705	11.6294
CCA0143S0004	evm.TU.Contig1195.4	Contig1195	scaffold2116	88049	99764	-	0	0	0
CCA0143S0005	evm.TU.Contig1195.5	Contig1195	scaffold2116	105377	125093	+	7.39101	8.58802	8.79591
CCA0144S0001	evm.TU.Contig11966.1	Contig11966	scaffold2134	39	269	+	0	0	0
CCA0145S0001	evm.TU.Contig1197.1	Contig1197	scaffold2138	8397	16619	-	0	0	0
CCA0145S0002	evm.TU.Contig1197.2	Contig1197	scaffold2138	17350	17769	+	0	0	0
CCA0145S0003	evm.TU.Contig1197.3	Contig1197	scaffold2138	47106	48152	+	0	0	0
CCA0146S0001	evm.TU.Contig12.1	Contig12	scaffold2170	68	3088	-	128.103	53.9276	80.9233
CCA0146S0004	evm.TU.Contig12.4	Contig12	scaffold2170	13337	15172	-	0	0.483171	0
CCA0146S0005	evm.TU.Contig12.5	Contig12	scaffold2170	15767	16335	-	0	0	0
CCA0146S0006	evm.TU.Contig12.6	Contig12	scaffold2170	19127	19481	+	2.01037	0	0
CCA0147S0001	evm.TU.Contig1201.1	Contig1201	scaffold2183	1235	4032	-	0.484654	0.471331	1.25254
CCA0147S0002	evm.TU.Contig1201.2	Contig1201	scaffold2183	12062	13697	-	5.55192	2.30066	2.64434
CCA0147S0004	evm.TU.Contig1201.4	Contig1201	scaffold2183	58550	60868	+	0	0	0
CCA0147S0005	evm.TU.Contig1201.5	Contig1201	scaffold2183	72893	79539	+	11.1161	3.00546	7.87218
CCA0147S0006	evm.TU.Contig1201.6	Contig1201	scaffold2183	84988	86369	+	7.36143	12.4635	24.1993
CCA0147S0010	evm.TU.Contig1201.10	Contig1201	scaffold2183	115930	117429	+	0	0	0
CCA0147S0011	evm.TU.Contig1201.11	Contig1201	scaffold2183	120030	123397	-	1.78841	0.329122	2.57033
CCA0147S0015	evm.TU.Contig1201.15	Contig1201	scaffold2183	134858	135174	+	0	0	0
CCA0148S0002	evm.TU.Contig1202.2	Contig1202	scaffold2194	33616	40327	-	18.7505	16.4913	18.532
CCA0149S0002	evm.TU.Contig1204.2	Contig1204	scaffold2215	12434	13207	+	9.82823	4.11616	11.0282
CCA0149S0003	evm.TU.Contig1204.3	Contig1204	scaffold2215	13246	14241	+	4.21938	2.37311	4.47544
CCA0149S0004	evm.TU.Contig1204.4	Contig1204	scaffold2215	15984	16202	+	1.94333	0	0
CCA0149S0005	evm.TU.Contig1204.5	Contig1204	scaffold2215	16230	16829	+	0.553098	0.0897501	0.379083
CCA0149S0006	evm.TU.Contig1204.6	Contig1204	scaffold2215	18407	21283	-	0.829076	0.403098	1.37732
CCA0149S0007	evm.TU.Contig1204.7	Contig1204	scaffold2215	42854	44388	-	0.663037	1.55192	2.92084
CCA0150S0001	evm.TU.Contig1206.1	Contig1206	scaffold2237	7788	9551	-	0.604104	0.184569	0.716786
CCA0150S0002	evm.TU.Contig1206.2	Contig1206	scaffold2237	11077	16418	+	14.4302	7.40927	13.9155
CCA0151S0001	evm.TU.Contig1207.1	Contig1207	scaffold2247	14554	16456	-	0	0	0
CCA0151S0002	evm.TU.Contig1207.2	Contig1207	scaffold2247	40695	46586	+	7.21888	7.36283	9.53141
CCA0152S0001	evm.TU.Contig1209.1	Contig1209	scaffold2269	23974	24459	+	0	0	0
CCA0153S0001	evm.TU.Contig1210.1	Contig1210	scaffold2281	49297	50631	+	0.309349	0	0
CCA0154S0001	evm.TU.Contig1211.1	Contig1211	scaffold2292	21137	25156	+	4.6786	5.62644	6.40805
CCA0155S0002	evm.TU.Contig1212.2	Contig1212	scaffold2303	55007	93348	+	24.5564	25.6341	22.3544
CCA0156S0002	evm.TU.Contig1213.2	Contig1213	scaffold2314	20409	21790	+	1.75409	0.379046	8.91934
CCA0156S0004	evm.TU.Contig1213.4	Contig1213	scaffold2314	39923	41512	+	21.8397	60.0118	31.8413
CCA0156S0005	evm.TU.Contig1213.5	Contig1213	scaffold2314	54210	58238	+	0	0	0
CCA0156S0006	evm.TU.Contig1213.6	Contig1213	scaffold2314	59451	62934	-	2.18074	1.94413	2.13673
CCA0156S0008	evm.TU.Contig1213.8	Contig1213	scaffold2314	89161	90980	+	0	0	0
CCA0156S0009	evm.TU.Contig1213.9	Contig1213	scaffold2314	107429	109616	+	0	0	0.0245056
CCA0157S0001	evm.TU.Contig12142.1	Contig12142	scaffold2327	80	697	+	0	0	0
CCA0158S0001	evm.TU.Contig12152.1	Contig12152	scaffold2338	2009	3331	+	0.134805	0.13112	0
CCA0159S0001	evm.TU.Contig1216.1	Contig1216	scaffold2346	5489	7362	+	0	0	0
CCA0159S0002	evm.TU.Contig1216.2	Contig1216	scaffold2346	16723	19148	-	1.1085	0.143845	0.0759817
CCA0160S0001	evm.TU.Contig12189.1	Contig12189	scaffold2378	1985	2597	-	0	0	0
CCA0161S0001	evm.TU.Contig1219.1	Contig1219	scaffold2379	40402	44252	+	35.0526	13.5494	14.2601
CCA0161S0002	evm.TU.Contig1219.2	Contig1219	scaffold2379	71732	78453	-	23.1044	17.77	21.3919
CCA0162S0001	evm.TU.Contig1221.1	Contig1221	scaffold2402	42948	43520	-	0.610187	0.298427	0
CCA0163S0001	evm.TU.Contig1223.1	Contig1223	scaffold2423	1444	7267	+	0	0	0
CCA0163S0002	evm.TU.Contig1223.2	Contig1223	scaffold2423	10917	12134	-	0	0.136732	0
CCA0163S0003	evm.TU.Contig1223.3	Contig1223	scaffold2423	12140	16393	-	11.8799	13.0524	25.8643
CCA0163S0005	evm.TU.Contig1223.5	Contig1223	scaffold2423	53831	66195	+	0.316574	0.0279835	0.326312
CCA0163S0006	evm.TU.Contig1223.6	Contig1223	scaffold2423	67208	68137	+	0.223281	0.144873	0.0765236
CCA0163S0007	evm.TU.Contig1223.7	Contig1223	scaffold2423	72727	78965	-	3.42189	4.09707	8.55312
CCA0164S0002	evm.TU.Contig1224.2	Contig1224	scaffold2434	16946	19138	-	0.546053	1.89331	6.6831
CCA0165S0001	evm.TU.Contig1225.1	Contig1225	scaffold2445	14492	16130	-	0	0	0
CCA0165S0003	evm.TU.Contig1225.3	Contig1225	scaffold2445	17176	17684	+	0	0	0
CCA0165S0004	evm.TU.Contig1225.4	Contig1225	scaffold2445	46323	53130	+	0.499448	0.536333	0.864462
CCA0165S0005	evm.TU.Contig1225.5	Contig1225	scaffold2445	63752	64938	+	0.0860345	0	0.196612
CCA0165S0006	evm.TU.Contig1225.6	Contig1225	scaffold2445	66640	70816	-	3.12463	1.37671	4.78677
CCA0166S0001	evm.TU.Contig1226.1	Contig1226	scaffold2456	3120	4197	-	0	0	0
CCA0166S0002	evm.TU.Contig1226.2	Contig1226	scaffold2456	14140	20616	-	0	0	0
CCA0166S0006	evm.TU.Contig1226.6	Contig1226	scaffold2456	93091	102031	+	0.428811	0.393608	0.447302
CCA0167S0001	evm.TU.Contig1227.1	Contig1227	scaffold2466	9976	10378	-	0	0	0
CCA0168S0001	evm.TU.Contig1228.1	Contig1228	scaffold2477	3823	6785	-	0	0	0.0576218
CCA0169S0001	evm.TU.Contig1229.1	Contig1229	scaffold2488	5520	5843	+	0	0	0
CCA0169S0002	evm.TU.Contig1229.2	Contig1229	scaffold2488	17457	18189	+	0	0	0
CCA0169S0003	evm.TU.Contig1229.3	Contig1229	scaffold2488	38258	38967	-	0	0	0
CCA0169S0004	evm.TU.Contig1229.4	Contig1229	scaffold2488	43307	44079	+	0	0	0
CCA0169S0005	evm.TU.Contig1229.5	Contig1229	scaffold2488	49576	50139	+	0	0	0
CCA0169S0006	evm.TU.Contig1229.6	Contig1229	scaffold2488	86840	87430	+	0	0	0
CCA0170S0001	evm.TU.Contig1230.1	Contig1230	scaffold2499	15157	19961	+	6.83185	0.657084	6.95986
CCA0171S0001	evm.TU.Contig1231.1	Contig1231	scaffold2510	15083	17676	-	4.32347	1.565	3.78363
CCA0172S0001	evm.TU.Contig1237.1	Contig1237	scaffold2573	1	3038	-	0.815556	0.41763	0.281823
CCA0172S0002	evm.TU.Contig1237.2	Contig1237	scaffold2573	3485	4145	+	61.5637	39.9019	42.0464
CCA0173S0001	evm.TU.Contig1239.1	Contig1239	scaffold2594	4465	4981	+	0.106069	0.10353	0
CCA0174S0001	evm.TU.Contig1242.1	Contig1242	scaffold2625	18716	21679	+	8.25627	5.20142	7.28306
CCA0175S0001	evm.TU.Contig1244.1	Contig1244	scaffold2646	4468	5192	+	0	0.895065	0.786366
CCA0175S0002	evm.TU.Contig1244.2	Contig1244	scaffold2646	9041	10507	-	0	0	0
CCA0176S0001	evm.TU.Contig1245.1	Contig1245	scaffold2657	6948	12205	+	14.2096	6.04329	9.00141
CCA0176S0002	evm.TU.Contig1245.2	Contig1245	scaffold2657	12076	12792	-	13.9564	39.2649	10.4136
CCA0176S0003	evm.TU.Contig1245.3	Contig1245	scaffold2657	14083	18144	-	1.77822	10.9984	2.71385
CCA0176S0004	evm.TU.Contig1245.4	Contig1245	scaffold2657	57855	58664	-	28.136	22.1648	28.9312
CCA0176S0005	evm.TU.Contig1245.5	Contig1245	scaffold2657	59463	62983	-	8.55616	8.99423	4.52421
CCA0177S0001	evm.TU.Contig1246.1	Contig1246	scaffold2668	1707	3177	-	48.1327	52.9932	29.1158
CCA0177S0002	evm.TU.Contig1246.2	Contig1246	scaffold2668	3650	12279	-	2.76003	2.74471	1.8454
CCA0178S0001	evm.TU.Contig12460.1	Contig12460	scaffold2669	306	480	-	0	0	0
CCA0179S0001	evm.TU.Contig1248.1	Contig1248	scaffold2689	11709	13260	+	1.30447	0.115259	0.735824
CCA0179S0002	evm.TU.Contig1248.2	Contig1248	scaffold2689	17027	17944	+	0.0476003	0	0.199872
CCA0179S0003	evm.TU.Contig1248.3	Contig1248	scaffold2689	18564	19034	-	0.0743337	0.0724565	0.0763973
CCA0180S0001	evm.TU.Contig12486.1	Contig12486	scaffold2696	40	514	-	0	0	0
CCA0181S0001	evm.TU.Contig12488.1	Contig12488	scaffold2698	5426	5601	-	0	0	0
CCA0182S0001	evm.TU.Contig1249.1	Contig1249	scaffold2700	53506	54626	+	5.45569	4.45672	4.52582
CCA0183S0001	evm.TU.Contig1251.1	Contig1251	scaffold2723	5659	13045	+	14.4001	17.234	18.1319
CCA0183S0002	evm.TU.Contig1251.2	Contig1251	scaffold2723	21866	29597	+	3.63075	3.16532	4.52989
CCA0183S0003	evm.TU.Contig1251.3	Contig1251	scaffold2723	30211	31835	+	21.4708	28.0067	14.1849
CCA0183S0004	evm.TU.Contig1251.4	Contig1251	scaffold2723	32049	34124	+	0	0	0
CCA0183S0005	evm.TU.Contig1251.5	Contig1251	scaffold2723	37275	38433	+	3.93614	1.65982	11.4272
CCA0183S0006	evm.TU.Contig1251.6	Contig1251	scaffold2723	39046	47340	-	48.8709	47.4008	38.3243
CCA0183S0007	evm.TU.Contig1251.7	Contig1251	scaffold2723	53384	56120	+	17.4153	18.1828	12.2959
CCA0183S0008	evm.TU.Contig1251.8	Contig1251	scaffold2723	59908	65349	+	19.6769	10.4635	18.5341
CCA0183S0009	evm.TU.Contig1251.9	Contig1251	scaffold2723	72520	76174	+	0.0305272	0.0148373	0.0156985
CCA0183S0010	evm.TU.Contig1251.10	Contig1251	scaffold2723	76484	78040	-	60.3721	82.6879	48.451
CCA0183S0011	evm.TU.Contig1251.11	Contig1251	scaffold2723	78668	79621	-	110.55	63.3429	45.4813
CCA0183S0012	evm.TU.Contig1251.12	Contig1251	scaffold2723	80505	87808	-	4.18076	1.88071	2.96142
CCA0183S0013	evm.TU.Contig1251.13	Contig1251	scaffold2723	93523	96768	+	14.5803	12.6615	9.95134
CCA0183S0015	evm.TU.Contig1251.15	Contig1251	scaffold2723	103428	105622	-	9.76739	47.8648	14.1092
CCA0183S0016	evm.TU.Contig1251.16	Contig1251	scaffold2723	108418	111371	+	122.711	198.778	73.838
CCA0183S0017	evm.TU.Contig1251.17	Contig1251	scaffold2723	111732	112882	-	0	0.170658	0
CCA0183S0018	evm.TU.Contig1251.18	Contig1251	scaffold2723	121173	121699	-	0	0	0
CCA0183S0019	evm.TU.Contig1251.19	Contig1251	scaffold2723	128869	131930	+	15.2608	4.53906	7.48032
CCA0183S0020	evm.TU.Contig1251.20	Contig1251	scaffold2723	133263	135741	+	0.238291	0.579085	1.24073
CCA0183S0021	evm.TU.Contig1251.21	Contig1251	scaffold2723	133263	137012	-	2.01815	0.686567	1.08398
CCA0183S0022	evm.TU.Contig1251.22	Contig1251	scaffold2723	137379	141348	-	22.0071	17.3985	7.089
CCA0183S0023	evm.TU.Contig1251.23	Contig1251	scaffold2723	142648	145562	-	13.9664	8.51484	11.7282
CCA0184S0001	evm.TU.Contig1252.1	Contig1252	scaffold2734	7305	10464	+	0.304219	1.70337	0.473089
CCA0185S0001	evm.TU.Contig1253.1	Contig1253	scaffold2745	10379	10541	-	0	0	0
CCA0186S0004	evm.TU.Contig1254.4	Contig1254	scaffold2755	9312	9584	+	0	0	0
CCA0187S0001	evm.TU.Contig1257.1	Contig1257	scaffold2787	16840	21564	+	0	0	0
CCA0188S0004	evm.TU.Contig1259.4	Contig1259	scaffold2809	81953	84987	+	0.347314	1.74607	3.11022
CCA0189S0001	evm.TU.Contig1260.1	Contig1260	scaffold2820	8437	12454	+	0	0	0
CCA0189S0002	evm.TU.Contig1260.2	Contig1260	scaffold2820	17029	21033	+	0.185006	0.135008	0.190231
CCA0189S0003	evm.TU.Contig1260.3	Contig1260	scaffold2820	22677	26095	-	1.20304	0.7263	2.01882
CCA0190S0001	evm.TU.Contig1264.1	Contig1264	scaffold2863	11868	20515	-	5.63106	5.79925	5.46282
CCA0191S0001	evm.TU.Contig1265.1	Contig1265	scaffold2873	460	3110	+	0.558993	0	1.62637
CCA0192S0001	evm.TU.Contig12672.1	Contig12672	scaffold2898	621	890	-	0	0	2.27757
CCA0193S0001	evm.TU.Contig1272.1	Contig1272	scaffold2950	6306	7094	-	0	0	0
CCA0193S0002	evm.TU.Contig1272.2	Contig1272	scaffold2950	7245	9634	+	2.64644	0	0
CCA0194S0001	evm.TU.Contig1273.1	Contig1273	scaffold2961	9269	9679	-	0	0	0
CCA0195S0001	evm.TU.Contig1276.1	Contig1276	scaffold2994	2043	2399	-	0	0	0
CCA0195S0002	evm.TU.Contig1276.2	Contig1276	scaffold2994	2552	2980	-	0	0	0
CCA0195S0003	evm.TU.Contig1276.3	Contig1276	scaffold2994	3403	9158	-	0	0	0
CCA0195S0004	evm.TU.Contig1276.4	Contig1276	scaffold2994	9312	10637	-	0	0	0
CCA0195S0005	evm.TU.Contig1276.5	Contig1276	scaffold2994	14871	20176	+	0.0598984	0.131128	0.0307952
CCA0196S0001	evm.TU.Contig1277.1	Contig1277	scaffold3005	20939	77432	-	14.6216	6.31258	17.0283
CCA0196S0002	evm.TU.Contig1277.2	Contig1277	scaffold3005	80654	81364	-	2.18555	3.47126	7.29607
CCA0196S0003	evm.TU.Contig1277.3	Contig1277	scaffold3005	82687	89228	-	51.2757	33.4526	46.8752
CCA0196S0004	evm.TU.Contig1277.4	Contig1277	scaffold3005	91653	106220	-	5.87326	4.17829	4.44269
CCA0196S0005	evm.TU.Contig1277.5	Contig1277	scaffold3005	136928	152358	+	0.519136	5.82331	2.42315
CCA0197S0001	evm.TU.Contig1278.1	Contig1278	scaffold3016	36704	37426	+	4.66913	1.42709	4.31379
CCA0197S0002	evm.TU.Contig1278.2	Contig1278	scaffold3016	37539	38100	+	6.22846	1.71845	5.33538
CCA0197S0005	evm.TU.Contig1278.5	Contig1278	scaffold3016	77369	78259	+	1.68927	3.17133	2.24622
CCA0197S0006	evm.TU.Contig1278.6	Contig1278	scaffold3016	78326	78595	+	0.713016	0	2.7952
CCA0198S0001	evm.TU.Contig12793.1	Contig12793	scaffold3031	281	956	+	3.38952	2.85906	3.02032
CCA0199S0001	evm.TU.Contig1281.1	Contig1281	scaffold3050	36179	39141	-	0.311009	0.262043	2.8788
CCA0200S0001	evm.TU.Contig1284.1	Contig1284	scaffold3083	1104	11612	+	0.762911	0.494616	0.785028
CCA0200S0002	evm.TU.Contig1284.2	Contig1284	scaffold3083	19087	21512	-	0	0	0
CCA0200S0005	evm.TU.Contig1284.5	Contig1284	scaffold3083	35998	36878	-	0.240977	0	0
CCA0201S0001	evm.TU.Contig1285.1	Contig1285	scaffold3094	7018	26262	-	12.7064	16.6056	15.1542
CCA0201S0002	evm.TU.Contig1285.2	Contig1285	scaffold3094	26396	26547	-	0	0	0
CCA0202S0001	evm.TU.Contig1286.1	Contig1286	scaffold3105	1445	3839	+	0.324931	0.0902593	0.358046
CCA0203S0001	evm.TU.Contig1292.1	Contig1292	scaffold3170	1696	8564	+	15.0505	13.7314	18.7182
CCA0203S0003	evm.TU.Contig1292.3	Contig1292	scaffold3170	36983	43744	-	4.04242	7.38303	4.62549
CCA0204S0001	evm.TU.Contig1293.1	Contig1293	scaffold3181	18380	18555	+	0	0	0
CCA0205S0001	evm.TU.Contig12965.1	Contig12965	scaffold3220	2647	3387	+	4.84164	4.01449	3.54983
CCA0206S0002	evm.TU.Contig1299.2	Contig1299	scaffold3247	17525	19142	-	0	0	0.0787705
CCA0207S0001	evm.TU.Contig13.1	Contig13	scaffold3258	7381	7788	-	0	2.33744	0
CCA0208S0001	evm.TU.Contig1300.1	Contig1300	scaffold3260	847	6513	+	5.60312	6.51151	5.3144
CCA0208S0002	evm.TU.Contig1300.2	Contig1300	scaffold3260	6683	8534	+	24.5034	15.4857	17.3131
CCA0208S0003	evm.TU.Contig1300.3	Contig1300	scaffold3260	10454	19735	-	21.9671	43.7399	52.0564
CCA0208S0005	evm.TU.Contig1300.5	Contig1300	scaffold3260	39136	46005	-	13.0727	10.9723	19.4137
CCA0209S0001	evm.TU.Contig1301.1	Contig1301	scaffold3271	11561	12154	+	137.29	13.9793	1228.7
CCA0210S0001	evm.TU.Contig1305.1	Contig1305	scaffold3315	67940	68887	+	0	0	0
CCA0211S0001	evm.TU.Contig13062.1	Contig13062	scaffold3329	2643	4210	-	20.7353	27.6466	27.4977
CCA0211S0002	evm.TU.Contig13062.2	Contig13062	scaffold3329	5117	6703	+	2.8367	7.08928	2.47791
CCA0212S0001	evm.TU.Contig1307.1	Contig1307	scaffold3337	1250	14274	+	8.81298	8.60571	11.2244
CCA0213S0001	evm.TU.Contig1310.1	Contig1310	scaffold3371	8623	9890	+	1.55339	1.20827	1.85307
CCA0213S0002	evm.TU.Contig1310.2	Contig1310	scaffold3371	12639	14648	+	0	0	0
CCA0214S0001	evm.TU.Contig1311.1	Contig1311	scaffold3381	54082	59327	+	38.3685	85.2385	146.314
CCA0215S0001	evm.TU.Contig1312.1	Contig1312	scaffold3392	5317	6272	+	0	0	0
CCA0215S0002	evm.TU.Contig1312.2	Contig1312	scaffold3392	8287	8875	+	0.185713	0.181164	0
CCA0215S0003	evm.TU.Contig1312.3	Contig1312	scaffold3392	23761	25809	-	0.395637	0.0824335	0.058126
CCA0215S0004	evm.TU.Contig1312.4	Contig1312	scaffold3392	38033	41357	-	1.68331	2.38933	2.3591
CCA0215S0005	evm.TU.Contig1312.5	Contig1312	scaffold3392	47052	52428	+	2.97885	3.27853	3.4386
CCA0216S0001	evm.TU.Contig1313.1	Contig1313	scaffold3403	1157	2140	-	19.9014	25.042	23.3999
CCA0216S0002	evm.TU.Contig1313.2	Contig1313	scaffold3403	11999	13794	-	1.01184	0	0.297128
CCA0217S0001	evm.TU.Contig1315.1	Contig1315	scaffold3425	1588	6780	+	1.24623	0.574115	2.02373
CCA0217S0002	evm.TU.Contig1315.2	Contig1315	scaffold3425	13706	15767	+	67.2169	64.6484	60.0384
CCA0217S0003	evm.TU.Contig1315.3	Contig1315	scaffold3425	16534	17491	-	55.2999	122.455	67.6775
CCA0218S0001	evm.TU.Contig1316.1	Contig1316	scaffold3436	17591	19257	-	0.998687	1.7836	1.68048
CCA0218S0002	evm.TU.Contig1316.2	Contig1316	scaffold3436	23110	23514	-	0	0	0
CCA0218S0004	evm.TU.Contig1316.4	Contig1316	scaffold3436	29354	29758	-	0	0	0
CCA0218S0005	evm.TU.Contig1316.5	Contig1316	scaffold3436	32247	43487	+	0	0	0
CCA0218S0006	evm.TU.Contig1316.6	Contig1316	scaffold3436	44287	44652	+	0	0	0
CCA0219S0001	evm.TU.Contig1317.1	Contig1317	scaffold3447	42223	42692	-	0.996224	1.46891	0.510953
CCA0220S0001	evm.TU.Contig1318.1	Contig1318	scaffold3458	6050	6863	-	0.148149	0	0
CCA0221S0001	evm.TU.Contig13192.1	Contig13192	scaffold3471	3373	4171	+	0	0	0
CCA0222S0002	evm.TU.Contig1320.2	Contig1320	scaffold3479	43848	44591	+	0	0	0
CCA0222S0003	evm.TU.Contig1320.3	Contig1320	scaffold3479	44607	47141	+	0	0.0335805	0.0157909
CCA0223S0002	evm.TU.Contig1322.2	Contig1322	scaffold3501	3974	5133	+	0.0978721	0.0423084	0.0894629
CCA0224S0001	evm.TU.Contig1326.1	Contig1326	scaffold3543	45	602	-	0	0	0
CCA0225S0001	evm.TU.Contig1327.1	Contig1327	scaffold3554	4703	6885	+	12.0303	17.089	61.3789
CCA0226S0001	evm.TU.Contig1332.1	Contig1332	scaffold3607	2148	3080	-	0	0	0
CCA0227S0001	evm.TU.Contig13330.1	Contig13330	scaffold3618	522	961	-	0.494637	0.966343	4.31909
CCA0228S0001	evm.TU.Contig1334.1	Contig1334	scaffold3628	5093	5285	-	0	0	4.09606
CCA0229S0001	evm.TU.Contig1337.1	Contig1337	scaffold3659	1474	41127	-	1.55043	1.73753	0.686513
CCA0230S0001	evm.TU.Contig1349.1	Contig1349	scaffold3789	2220	3223	-	1.03956	7.71084	10.2538
CCA0231S0001	evm.TU.Contig1352.1	Contig1352	scaffold3823	348	1720	+	1.94116	2.43453	1.93847
CCA0232S0001	evm.TU.Contig1353.1	Contig1353	scaffold3834	930	8081	+	0	0	0
CCA0232S0002	evm.TU.Contig1353.2	Contig1353	scaffold3834	9151	13393	+	0	0	0
CCA0233S0001	evm.TU.Contig1354.1	Contig1354	scaffold3845	3178	3443	+	0	0	0
CCA0234S0002	evm.TU.Contig1359.2	Contig1359	scaffold3898	25881	30276	-	14.8907	13.1762	44.8095
CCA0235S0001	evm.TU.Contig1360.1	Contig1360	scaffold3909	22722	25426	-	0	0	0
CCA0236S0001	evm.TU.Contig13641.1	Contig13641	scaffold3954	9987	13534	+	3.42225	2.40697	16.5246
CCA0237S0001	evm.TU.Contig13659.1	Contig13659	scaffold3973	153	564	-	0	0	0
CCA0238S0001	evm.TU.Contig1366.1	Contig1366	scaffold3974	4724	5328	+	0	0	0
CCA0238S0002	evm.TU.Contig1366.2	Contig1366	scaffold3974	6877	9137	-	6.43615	9.90527	9.04186
CCA0239S0001	evm.TU.Contig1370.1	Contig1370	scaffold4019	15655	29272	-	0.163962	2.41599	0.0269761
CCA0240S0002	evm.TU.Contig1372.2	Contig1372	scaffold4040	25180	25902	+	0	0	0
CCA0240S0003	evm.TU.Contig1372.3	Contig1372	scaffold4040	26779	29436	-	0.140484	0.292659	0.78434
CCA0241S0001	evm.TU.Contig1373.1	Contig1373	scaffold4051	15516	19457	+	44.006	52.2965	67.8842
CCA0241S0002	evm.TU.Contig1373.2	Contig1373	scaffold4051	19632	20890	+	25.1555	26.0725	45.4741
CCA0242S0001	evm.TU.Contig1374.1	Contig1374	scaffold4062	8089	8503	+	0	0	0
CCA0242S0002	evm.TU.Contig1374.2	Contig1374	scaffold4062	12301	12591	+	0	0	0
CCA0243S0001	evm.TU.Contig1375.1	Contig1375	scaffold4073	5375	6262	-	9.17375	7.71173	7.7644
CCA0243S0002	evm.TU.Contig1375.2	Contig1375	scaffold4073	6563	6952	-	0	0	0
CCA0243S0004	evm.TU.Contig1375.4	Contig1375	scaffold4073	51344	53833	-	0	0	0
CCA0243S0005	evm.TU.Contig1375.5	Contig1375	scaffold4073	54100	54300	-	0	0	0
CCA0244S0001	evm.TU.Contig1378.1	Contig1378	scaffold4106	4134	5496	-	0.331479	0.15028	0.360137
CCA0244S0004	evm.TU.Contig1378.4	Contig1378	scaffold4106	91402	92361	-	2.33096	1.35105	3.45696
CCA0244S0005	evm.TU.Contig1378.5	Contig1378	scaffold4106	92384	94591	-	1.49739	0.891761	2.06153
CCA0245S0001	evm.TU.Contig13798.1	Contig13798	scaffold4125	6246	6626	-	0	0	0
CCA0246S0001	evm.TU.Contig1380.1	Contig1380	scaffold4128	2371	8802	-	0	0	0
CCA0246S0002	evm.TU.Contig1380.2	Contig1380	scaffold4128	15361	18477	-	23.0713	5.7983	17.2733
CCA0247S0001	evm.TU.Contig1387.1	Contig1387	scaffold4204	9102	13324	+	0.173868	0.46303	0.178022
CCA0247S0002	evm.TU.Contig1387.2	Contig1387	scaffold4204	15523	22814	-	4.9336	2.24916	3.90899
CCA0248S0001	evm.TU.Contig1388.1	Contig1388	scaffold4215	1258	3278	+	0.0450003	0.120976	0.0507895
CCA0249S0001	evm.TU.Contig13922.1	Contig13922	scaffold4263	431	1434	+	0	0.386881	0.407628
CCA0250S0001	evm.TU.Contig1393.1	Contig1393	scaffold4271	1340	4489	-	14.598	12.608	18.9957
CCA0250S0002	evm.TU.Contig1393.2	Contig1393	scaffold4271	4556	5870	-	7.20345	5.20014	9.20845
CCA0251S0001	evm.TU.Contig14.1	Contig14	scaffold4348	566	3071	-	0.322083	0.522801	0.220732
CCA0252S0001	evm.TU.Contig1401.1	Contig1401	scaffold4360	10053	10706	+	0	0	0.0817717
CCA0253S0001	evm.TU.Contig1403.1	Contig1403	scaffold4382	6060	8342	-	1.16711	1.27637	2.65278
CCA0254S0001	evm.TU.Contig1404.1	Contig1404	scaffold4393	301	1448	+	0	0.184958	0.0488226
CCA0255S0001	evm.TU.Contig14047.1	Contig14047	scaffold4401	50	241	+	0	8.8984	0
CCA0256S0001	evm.TU.Contig1414.1	Contig1414	scaffold4500	3007	10296	-	28.0771	38.0153	20.6684
CCA0256S0002	evm.TU.Contig1414.2	Contig1414	scaffold4500	12122	15933	+	1.20029	7.83192	0.574966
CCA0256S0003	evm.TU.Contig1414.3	Contig1414	scaffold4500	18492	20507	-	0	0	0
CCA0257S0001	evm.TU.Contig1418.1	Contig1418	scaffold4543	6159	6329	-	0	0	0
CCA0258S0001	evm.TU.Contig1420.1	Contig1420	scaffold4566	297	2481	+	14.1738	11.1833	15.6342
CCA0259S0001	evm.TU.Contig1421.1	Contig1421	scaffold4577	17303	18706	+	34.6779	18.6286	19.8726
CCA0259S0002	evm.TU.Contig1421.2	Contig1421	scaffold4577	26370	31966	-	56.0568	63.0511	58.5248
CCA0259S0003	evm.TU.Contig1421.3	Contig1421	scaffold4577	43451	50675	-	70.6228	38.5423	74.8646
CCA0260S0001	evm.TU.Contig1422.1	Contig1422	scaffold4588	9479	10438	+	14.1579	1.67011	30.9913
CCA0260S0002	evm.TU.Contig1422.2	Contig1422	scaffold4588	10610	11170	+	18.2504	2.1537	32.7445
CCA0260S0003	evm.TU.Contig1422.3	Contig1422	scaffold4588	12077	12783	-	0	0	0.144139
CCA0261S0001	evm.TU.Contig14235.1	Contig14235	scaffold4605	3833	5177	+	0.173155	0.0561218	0.238494
CCA0262S0001	evm.TU.Contig14239.1	Contig14239	scaffold4609	29	725	+	0.143398	0	0.294879
CCA0263S0001	evm.TU.Contig1424.1	Contig1424	scaffold4610	15627	18950	-	1.83323	1.34205	1.57524
CCA0263S0002	evm.TU.Contig1424.2	Contig1424	scaffold4610	24709	25382	+	1.05962	2.65192	2.25673
CCA0264S0001	evm.TU.Contig1426.1	Contig1426	scaffold4632	482	931	+	0	0	0.166377
CCA0264S0002	evm.TU.Contig1426.2	Contig1426	scaffold4632	1176	1900	+	0	1.11776	0.290604
CCA0264S0003	evm.TU.Contig1426.3	Contig1426	scaffold4632	4380	4879	+	12.2617	2.4102	12.585
CCA0264S0004	evm.TU.Contig1426.4	Contig1426	scaffold4632	6681	9789	-	22.0729	11.5351	22.0598
CCA0264S0005	evm.TU.Contig1426.5	Contig1426	scaffold4632	11610	12499	-	15.9153	28.1945	11.7446
CCA0265S0001	evm.TU.Contig1428.1	Contig1428	scaffold4653	49960	50397	+	0	0	0
CCA0266S0001	evm.TU.Contig1435.1	Contig1435	scaffold4729	7611	12512	+	42.9193	21.6061	31.8281
CCA0267S0001	evm.TU.Contig1437.1	Contig1437	scaffold4751	8565	9622	-	7.91225	7.0152	7.81299
CCA0268S0001	evm.TU.Contig1440.1	Contig1440	scaffold4785	18745	36858	+	14.9857	18.4237	9.91293
CCA0269S0001	evm.TU.Contig1446.1	Contig1446	scaffold4850	3192	8329	-	1.48221	2.0414	1.12769
CCA0270S0001	evm.TU.Contig1450.1	Contig1450	scaffold4892	39759	40382	-	0	0	0
CCA0271S0001	evm.TU.Contig1452.1	Contig1452	scaffold4914	239	3197	+	14.6489	11.4384	31.2508
CCA0272S0001	evm.TU.Contig1453.1	Contig1453	scaffold4925	2205	11688	+	11.8744	10.6513	12.4822
CCA0272S0002	evm.TU.Contig1453.2	Contig1453	scaffold4925	14404	16216	+	6.80628	2.02552	11.0154
CCA0273S0001	evm.TU.Contig14555.1	Contig14555	scaffold4953	144	503	-	0	0	0
CCA0274S0001	evm.TU.Contig1456.1	Contig1456	scaffold4958	8181	10961	+	0	0	0
CCA0274S0003	evm.TU.Contig1456.3	Contig1456	scaffold4958	33514	40603	+	30.7408	10.8299	34.1361
CCA0274S0004	evm.TU.Contig1456.4	Contig1456	scaffold4958	41041	43040	+	17.5999	16.7239	22.7666
CCA0274S0005	evm.TU.Contig1456.5	Contig1456	scaffold4958	44915	45825	-	0	0	0
CCA0275S0001	evm.TU.Contig1457.1	Contig1457	scaffold4968	2719	5583	-	11.8914	21.8422	20.9084
CCA0276S0001	evm.TU.Contig14578.1	Contig14578	scaffold4977	38	567	+	1.1741	0	0
CCA0277S0001	evm.TU.Contig1459.1	Contig1459	scaffold4990	331	2003	+	1.48953	2.39185	1.85261
CCA0277S0002	evm.TU.Contig1459.2	Contig1459	scaffold4990	3047	7592	-	8.65072	19.8018	5.47754
CCA0277S0003	evm.TU.Contig1459.3	Contig1459	scaffold4990	8547	17385	+	51.6827	18.9292	32.3462
CCA0277S0004	evm.TU.Contig1459.4	Contig1459	scaffold4990	18029	21694	-	24.9782	20.5118	13.44
CCA0277S0005	evm.TU.Contig1459.5	Contig1459	scaffold4990	27861	29267	-	190.676	515.935	209.613
CCA0277S0006	evm.TU.Contig1459.6	Contig1459	scaffold4990	30826	34271	-	7.95748	16.8571	7.86366
CCA0277S0007	evm.TU.Contig1459.7	Contig1459	scaffold4990	37885	39902	+	0	0	0
CCA0278S0002	evm.TU.Contig1460.2	Contig1460	scaffold5002	11114	12949	-	1.53561	1.61958	4.68429
CCA0278S0004	evm.TU.Contig1460.4	Contig1460	scaffold5002	48948	52011	-	0.668859	1.03031	0.974339
CCA0279S0001	evm.TU.Contig1463.1	Contig1463	scaffold5035	32088	35463	+	3.95033	0.93203	3.76388
CCA0279S0002	evm.TU.Contig1463.2	Contig1463	scaffold5035	46944	47261	+	17.4307	13.3179	0
CCA0280S0001	evm.TU.Contig14645.1	Contig14645	scaffold5052	15	926	-	0	0	0
CCA0281S0001	evm.TU.Contig1470.1	Contig1470	scaffold5113	23551	27920	-	0.802	0.211376	0.695236
CCA0281S0003	evm.TU.Contig1470.3	Contig1470	scaffold5113	37800	47406	+	0	0	0
CCA0282S0001	evm.TU.Contig1478.1	Contig1478	scaffold5197	12844	14210	-	0.0141427	0	0.145446
CCA0282S0002	evm.TU.Contig1478.2	Contig1478	scaffold5197	15620	16807	-	19.7065	1.50963	11.6599
CCA0282S0003	evm.TU.Contig1478.3	Contig1478	scaffold5197	35081	60289	+	0.804832	0.215169	0.269017
CCA0283S0001	evm.TU.Contig14784.1	Contig14784	scaffold5202	10474	10889	-	0	0	0
CCA0284S0001	evm.TU.Contig1479.1	Contig1479	scaffold5208	378	13399	-	1.04591	0.70339	0.548534
CCA0284S0002	evm.TU.Contig1479.2	Contig1479	scaffold5208	15726	16788	+	0	0	0
CCA0285S0001	evm.TU.Contig1481.1	Contig1481	scaffold5231	5	2221	-	5.9639	6.38563	4.81527
CCA0285S0002	evm.TU.Contig1481.2	Contig1481	scaffold5231	5846	8151	-	3.79213	3.57153	2.61286
CCA0286S0001	evm.TU.Contig1482.1	Contig1482	scaffold5242	4951	7837	-	0	0.0182368	0
CCA0286S0002	evm.TU.Contig1482.2	Contig1482	scaffold5242	11996	12603	-	5.8389	1.0768	2.25424
CCA0287S0001	evm.TU.Contig1483.1	Contig1483	scaffold5253	501	2452	-	0	0	0
CCA0287S0002	evm.TU.Contig1483.2	Contig1483	scaffold5253	3661	3882	-	0	0	0
CCA0287S0003	evm.TU.Contig1483.3	Contig1483	scaffold5253	39190	44889	+	0	0	0
CCA0288S0001	evm.TU.Contig14838.1	Contig14838	scaffold5262	103	513	+	2.91078	1.62333	4.69965
CCA0289S0001	evm.TU.Contig1489.1	Contig1489	scaffold5317	6247	8003	+	0	0	0.0462082
CCA0290S0001	evm.TU.Contig1490.1	Contig1490	scaffold5329	7367	13225	+	2.87447	7.52289	3.52222
CCA0291S0001	evm.TU.Contig1491.1	Contig1491	scaffold5340	693	845	-	0	0	0
CCA0292S0003	evm.TU.Contig1492.3	Contig1492	scaffold5351	32225	32954	-	0.199979	0.0648664	0.0685404
CCA0293S0001	evm.TU.Contig1497.1	Contig1497	scaffold5405	6784	7498	+	0	0	0
CCA0294S0001	evm.TU.Contig1498.1	Contig1498	scaffold5414	4645	23851	+	5.58672	4.55491	3.71534
CCA0295S0001	evm.TU.Contig15.1	Contig15	scaffold5434	1483	5166	+	0.401533	0.564134	0.229395
CCA0295S0002	evm.TU.Contig15.2	Contig15	scaffold5434	6843	13949	-	0.950533	0.407747	0.230012
CCA0296S0002	evm.TU.Contig1501.2	Contig1501	scaffold5446	2068	3453	+	28.7196	31.9092	19.9789
CCA0297S0001	evm.TU.Contig1505.1	Contig1505	scaffold5489	1	1683	+	5.04813	1.79137	4.48096
CCA0298S0001	evm.TU.Contig1506.1	Contig1506	scaffold5499	20732	23384	+	1.18105	1.25517	2.48574
CCA0299S0001	evm.TU.Contig15079.1	Contig15079	scaffold5520	30	776	-	6.01836	13.7479	8.58804
CCA0300S0001	evm.TU.Contig15103.1	Contig15103	scaffold5547	158	520	+	0	0	0
CCA0301S0001	evm.TU.Contig1511.1	Contig1511	scaffold5554	17192	17779	-	21.0234	9.76993	23.5779
CCA0302S0001	evm.TU.Contig1514.1	Contig1514	scaffold5586	17485	18460	+	17.713	14.5046	12.5225
CCA0303S0001	evm.TU.Contig1515.1	Contig1515	scaffold5597	2113	2540	+	12.043	9.41077	10.585
CCA0303S0002	evm.TU.Contig1515.2	Contig1515	scaffold5597	2680	4513	+	2.41158	0.854099	3.94393
CCA0303S0003	evm.TU.Contig1515.3	Contig1515	scaffold5597	12116	15226	-	6.24755	3.59657	4.46074
CCA0303S0004	evm.TU.Contig1515.4	Contig1515	scaffold5597	18004	22336	-	20.2171	12.9124	15.7583
CCA0304S0001	evm.TU.Contig1519.1	Contig1519	scaffold5640	1422	2464	-	0.319973	0.427893	0.946012
CCA0305S0002	evm.TU.Contig1520.2	Contig1520	scaffold5652	9028	9258	-	0	0	0
CCA0306S0001	evm.TU.Contig15217.1	Contig15217	scaffold5670	4	727	-	0	0	0.117624
CCA0307S0001	evm.TU.Contig1522.1	Contig1522	scaffold5673	11916	14181	+	0.0284137	0	0.0292213
CCA0307S0003	evm.TU.Contig1522.3	Contig1522	scaffold5673	18421	21309	-	0.0312902	0	0.0321817
CCA0307S0004	evm.TU.Contig1522.4	Contig1522	scaffold5673	35244	37815	-	0	0.0321189	0.0382299
CCA0308S0001	evm.TU.Contig1523.1	Contig1523	scaffold5683	862	9746	+	8.09845	10.1203	6.94382
CCA0309S0001	evm.TU.Contig1526.1	Contig1526	scaffold5716	1	4696	+	4.49725	11.9083	9.21831
CCA0309S0002	evm.TU.Contig1526.2	Contig1526	scaffold5716	7699	9342	+	0.189357	0.117913	0.124611
CCA0310S0001	evm.TU.Contig1528.1	Contig1528	scaffold5738	20819	25958	+	7.69085	5.31898	9.43961
CCA0310S0002	evm.TU.Contig1528.2	Contig1528	scaffold5738	27106	30042	+	0.0187522	3.13684	0.463699
CCA0310S0004	evm.TU.Contig1528.4	Contig1528	scaffold5738	31782	34817	-	14.9622	38.9632	6.10668
CCA0310S0005	evm.TU.Contig1528.5	Contig1528	scaffold5738	38834	42784	+	11.1722	8.34341	8.06931
CCA0310S0006	evm.TU.Contig1528.6	Contig1528	scaffold5738	43655	46071	-	0.26124	0.070539	0.522444
CCA0311S0002	evm.TU.Contig1534.2	Contig1534	scaffold5804	39409	40776	-	2.03444	0.874407	0.535176
CCA0312S0001	evm.TU.Contig1535.1	Contig1535	scaffold5815	11349	14101	+	11.1137	11.5143	7.08543
CCA0313S0001	evm.TU.Contig15368.1	Contig15368	scaffold5835	341	1441	+	4.51183	8.78033	7.38365
CCA0314S0001	evm.TU.Contig1537.1	Contig1537	scaffold5837	519	1773	-	1.04565	1.01885	0.809193
CCA0315S0001	evm.TU.Contig1538.1	Contig1538	scaffold5847	244	1554	-	9.93961	3.57855	5.4602
CCA0316S0001	evm.TU.Contig1544.1	Contig1544	scaffold5912	380	2463	-	3.29304	4.55007	5.39682
CCA0317S0001	evm.TU.Contig15466.1	Contig15466	scaffold5940	2718	3035	-	0	1.06209	0
CCA0318S0001	evm.TU.Contig15506.1	Contig15506	scaffold5984	34	228	-	0	0	0
CCA0319S0001	evm.TU.Contig15532.1	Contig15532	scaffold6013	1114	1338	+	0	0	0
CCA0320S0001	evm.TU.Contig1554.1	Contig1554	scaffold6021	1088	1666	-	0	0	0
CCA0321S0001	evm.TU.Contig1555.1	Contig1555	scaffold6032	4038	8870	-	0	0	0.709949
CCA0322S0002	evm.TU.Contig1558.2	Contig1558	scaffold6065	8335	9246	-	3.88667	0	3.70175
CCA0323S0001	evm.TU.Contig1560.1	Contig1560	scaffold6088	2734	4929	-	0	0	0
CCA0323S0002	evm.TU.Contig1560.2	Contig1560	scaffold6088	23368	24309	+	0.137772	0	0.28335
CCA0323S0003	evm.TU.Contig1560.3	Contig1560	scaffold6088	27449	34946	-	0	0	0
CCA0324S0001	evm.TU.Contig15624.1	Contig15624	scaffold6115	376	566	+	0	0	0
CCA0325S0001	evm.TU.Contig1568.1	Contig1568	scaffold6174	2336	3577	-	0.840272	1.59174	1.08243
CCA0326S0001	evm.TU.Contig1570.1	Contig1570	scaffold6197	3128	5908	+	1.7529	4.40708	4.65592
CCA0326S0003	evm.TU.Contig1570.2_evm.TU.Contig1570.3	Contig1570	scaffold6197	7389	13440	-	3.28714	2.13601	4.10392
CCA0327S0002	evm.TU.Contig1571.2	Contig1571	scaffold6208	16712	19449	-	0.16057	21.2066	21.33
CCA0328S0003	evm.TU.Contig1572.3	Contig1572	scaffold6219	7770	10246	-	9.83628	9.24812	10.0195
CCA0329S0001	evm.TU.Contig1574.1	Contig1574	scaffold6241	34649	35105	-	6.6888	9.16092	12.2752
CCA0329S0002	evm.TU.Contig1574.2	Contig1574	scaffold6241	35481	37528	-	1.36283	3.05108	1.98824
CCA0330S0001	evm.TU.Contig1580.1	Contig1580	scaffold6308	10845	14044	+	0	0	0
CCA0331S0001	evm.TU.Contig15809.1	Contig15809	scaffold6318	40	281	+	15.4807	31.7774	66.0865
CCA0332S0001	evm.TU.Contig1588.1	Contig1588	scaffold6395	51	236	+	0	0	0
CCA0333S0001	evm.TU.Contig1597.1	Contig1597	scaffold6495	322	477	+	0	0	0
CCA0334S0001	evm.TU.Contig1598.1	Contig1598	scaffold6506	12862	13020	+	0	0	0
CCA0335S0001	evm.TU.Contig16.1	Contig16	scaffold6526	390	1107	-	0	0	0
CCA0335S0002	evm.TU.Contig16.2	Contig16	scaffold6526	9334	11881	-	33.4199	11.7154	19.5845
CCA0335S0003	evm.TU.Contig16.3	Contig16	scaffold6526	12358	13178	+	3.18005	5.35365	4.01123
CCA0335S0004	evm.TU.Contig16.4	Contig16	scaffold6526	16521	18332	+	0.371426	0.181164	0.572496
CCA0336S0001	evm.TU.Contig1615.1	Contig1615	scaffold6692	10675	10835	+	0	0	0
CCA0337S0001	evm.TU.Contig1616.1	Contig1616	scaffold6703	637	1041	-	0	0	0
CCA0338S0001	evm.TU.Contig1617.1	Contig1617	scaffold6714	1632	4224	+	0.206989	0	0.0681054
CCA0339S0001	evm.TU.Contig16322.1	Contig16322	scaffold6879	19	317	+	0	0	0
CCA0340S0001	evm.TU.Contig16411.1	Contig16411	scaffold6978	8	244	-	0	0	0
CCA0341S0001	evm.TU.Contig16601.1	Contig16601	scaffold7188	138	525	-	8180.99	4246.7	6260.31
CCA0342S0001	evm.TU.Contig1661.1	Contig1661	scaffold7197	462	1118	+	0	0	0
CCA0343S0001	evm.TU.Contig16632.1	Contig16632	scaffold7222	11822	14160	+	0	0	0
CCA0344S0001	evm.TU.Contig16649.1	Contig16649	scaffold7240	1	782	-	4.20114	2.80307	7.09662
CCA0345S0001	evm.TU.Contig16689.1	Contig16689	scaffold7283	25	654	+	3.04917	0.82451	1.04496
CCA0346S0001	evm.TU.Contig1678.1	Contig1678	scaffold7380	11002	21873	-	0	1.87377	1.63093
CCA0347S0001	evm.TU.Contig1680.1	Contig1680	scaffold7403	27388	28163	-	0	0	0
CCA0347S0002	evm.TU.Contig1680.2	Contig1680	scaffold7403	33088	34035	-	0	0	0
CCA0348S0001	evm.TU.Contig16811.1	Contig16811	scaffold7416	3257	3999	+	0	0	0
CCA0349S0001	evm.TU.Contig1695.1	Contig1695	scaffold7566	25851	26870	+	0	0	0.0353135
CCA0350S0002	evm.TU.Contig16963.2	Contig16963	scaffold7580	4170	5683	+	2.80449	3.74191	1.01345
CCA0351S0001	evm.TU.Contig16982.1	Contig16982	scaffold7601	52	665	-	0.22394	0.109059	0.690606
CCA0352S0001	evm.TU.Contig16985.1	Contig16985	scaffold7604	10	655	-	4.80086	7.49604	5.30817
CCA0353S0001	evm.TU.Contig17.1	Contig17	scaffold7619	4534	5384	+	59.499	39.7851	67.4949
CCA0353S0002	evm.TU.Contig17.2	Contig17	scaffold7619	6921	11690	-	9.87501	5.12536	4.9008
CCA0353S0004	evm.TU.Contig17.4	Contig17	scaffold7619	12734	16475	-	0.536293	0.29827	0.0787705
CCA0354S0001	evm.TU.Contig17018.1	Contig17018	scaffold7641	874	3244	-	25.8894	28.3142	18.1193
CCA0355S0002	evm.TU.Contig1715.2	Contig1715	scaffold7784	1690	2074	-	0.157132	0.307465	0
CCA0356S0001	evm.TU.Contig1719.1	Contig1719	scaffold7827	22584	23764	-	0	0	0
CCA0356S0002	evm.TU.Contig1719.2	Contig1719	scaffold7827	47200	50501	-	2.43718	1.07899	2.27759
CCA0357S0001	evm.TU.Contig17190.1	Contig17190	scaffold7828	266	1330	+	0.207913	0.645332	0
CCA0358S0001	evm.TU.Contig1720.1	Contig1720	scaffold7839	11558	15447	-	0.290727	1.97854	1.771
CCA0359S0001	evm.TU.Contig17208.1	Contig17208	scaffold7848	2567	2911	+	0	0	0
CCA0360S0001	evm.TU.Contig17209.1	Contig17209	scaffold7849	292	558	+	0	0	0
CCA0360S0002	evm.TU.Contig17209.2	Contig17209	scaffold7849	1269	1475	-	15.9587	16.2466	15.1955
CCA0361S0001	evm.TU.Contig17257.1	Contig17257	scaffold7901	94	626	+	0	0	0.0590278
CCA0362S0001	evm.TU.Contig1727.1	Contig1727	scaffold7915	16633	17896	-	1.33327	1.5071	1.80503
CCA0363S0001	evm.TU.Contig17428.1	Contig17428	scaffold8088	529	2312	-	0.328154	1.27627	278.621
CCA0364S0001	evm.TU.Contig1743.1	Contig1743	scaffold8090	11835	12336	-	0	0	0
CCA0365S0001	evm.TU.Contig1757.1	Contig1757	scaffold8244	3385	5217	+	41.9669	24.2526	33.5653
CCA0366S0001	evm.TU.Contig1759.1	Contig1759	scaffold8266	12430	12872	-	0.171471	5.51828	0.881051
CCA0367S0001	evm.TU.Contig1764.1	Contig1764	scaffold8322	2691	7266	+	13.4051	8.79051	12.1687
CCA0367S0002	evm.TU.Contig1764.2	Contig1764	scaffold8322	8546	9334	+	8.46834	6.9716	12.7872
CCA0368S0001	evm.TU.Contig17753.1	Contig17753	scaffold8441	141	587	+	0	0	0
CCA0369S0001	evm.TU.Contig17774.1	Contig17774	scaffold8464	67	320	+	0	0	0
CCA0370S0001	evm.TU.Contig17781.1	Contig17781	scaffold8472	2461	3329	-	0.48837	8.08139	2.4276
CCA0371S0001	evm.TU.Contig1783.1	Contig1783	scaffold8524	2736	4392	-	0	0	0.0569088
CCA0371S0003	evm.TU.Contig1783.2_evm.TU.Contig1783.3	Contig1783	scaffold8524	7239	12097	+	0.0278326	0.108249	0.257614
CCA0372S0001	evm.TU.Contig17880.1	Contig17880	scaffold8580	226	383	+	0	0	0
CCA0373S0001	evm.TU.Contig18.1	Contig18	scaffold8709	2947	5199	+	225.707	63.7953	117.192
CCA0373S0002	evm.TU.Contig18.2	Contig18	scaffold8709	5225	7414	+	322.702	94.5015	194.727
CCA0373S0003	evm.TU.Contig18.3	Contig18	scaffold8709	7675	7843	+	10366.2	3388.59	4332.16
CCA0374S0002	evm.TU.Contig1801.1_evm.TU.Contig1801.2	Contig1801	scaffold8720	3556	4897	-	0.054572	0	0.11223
CCA0375S0002	evm.TU.Contig1804.2	Contig1804	scaffold8753	28181	31698	+	0.266928	2.98573	1.73844
CCA0376S0001	evm.TU.Contig1805.1	Contig1805	scaffold8764	1	4086	+	6.19776	3.42575	6.15172
CCA0376S0003	evm.TU.Contig1805.3	Contig1805	scaffold8764	4818	8804	-	0.0908642	2.53466	0.822444
CCA0377S0001	evm.TU.Contig1822.1	Contig1822	scaffold8951	3539	3909	-	0	0	0
CCA0378S0001	evm.TU.Contig1826.1	Contig1826	scaffold8994	956	8538	+	9.15876	24.9523	9.28429
CCA0379S0001	evm.TU.Contig18292.1	Contig18292	scaffold9030	12320	13635	-	9.066	9.0592	9.64316
CCA0380S0001	evm.TU.Contig1830.1	Contig1830	scaffold9039	926	1800	+	0	0	0
CCA0381S0001	evm.TU.Contig1831.1	Contig1831	scaffold9050	56	987	-	50.1559	51.9223	43.1873
CCA0382S0001	evm.TU.Contig1836.1	Contig1836	scaffold9105	1546	2376	-	0	0	0
CCA0382S0002	evm.TU.Contig1836.2	Contig1836	scaffold9105	15718	20668	-	0	0.0432678	0.114428
CCA0382S0004	evm.TU.Contig1836.4	Contig1836	scaffold9105	52131	52847	+	0	0	0
CCA0383S0001	evm.TU.Contig1856.1	Contig1856	scaffold9321	22565	23696	-	208.147	384.025	348.042
CCA0384S0002	evm.TU.Contig1866.2	Contig1866	scaffold9431	16790	19208	-	0	0	0
CCA0385S0001	evm.TU.Contig18758.1	Contig18758	scaffold9539	120	497	+	0	0.260173	0
CCA0386S0001	evm.TU.Contig18893.1	Contig18893	scaffold9684	1	715	+	7.02368	5.56184	10.5494
CCA0387S0001	evm.TU.Contig18905.1	Contig18905	scaffold9698	488	774	-	0	20.3551	0
CCA0388S0001	evm.TU.Contig18916.1	Contig18916	scaffold9710	53	1764	+	1.61672	0.615211	2.81921
CCA0389S0001	evm.TU.Contig1892.1	Contig1892	scaffold9714	971	1254	-	0	0	0
CCA0389S0002	evm.TU.Contig1892.2	Contig1892	scaffold9714	2212	2543	-	0	0	6.90166
CCA0390S0001	evm.TU.Contig1893.1	Contig1893	scaffold9725	181	4057	+	1.36162	1.25026	1.96308
CCA0390S0002	evm.TU.Contig1893.2	Contig1893	scaffold9725	4694	7595	-	0.618118	0.160313	0.169505
CCA0390S0003	evm.TU.Contig1893.3	Contig1893	scaffold9725	7599	8062	-	0	0	0
CCA0390S0004	evm.TU.Contig1893.4	Contig1893	scaffold9725	9273	34955	-	15.5173	15.2645	16.8298
CCA0391S0002	evm.TU.Contig18968.2	Contig18968	scaffold9764	2147	3074	+	8.77874	8.76048	0
CCA0392S0001	evm.TU.Contig18989.1	Contig18989	scaffold9787	225	2166	+	0	0	0.276537
CCA0393S0001	evm.TU.Contig19.1	Contig19	scaffold9799	664	1745	+	1453.89	434.574	435.158
CCA0393S0002	evm.TU.Contig19.2	Contig19	scaffold9799	7265	7677	+	0	0	0
CCA0394S0001	evm.TU.Contig19005.1	Contig19005	scaffold9806	8270	8699	+	0	0	0
CCA0395S0001	evm.TU.Contig1903.1	Contig1903	scaffold9833	1310	1866	-	7.20261	2.04249	4.11777
CCA0396S0001	evm.TU.Contig19033.1	Contig19033	scaffold9837	2726	3355	-	0.169398	0.164902	0
CCA0397S0001	evm.TU.Contig19078.1	Contig19078	scaffold9883	606	2761	-	2.52629	0.722386	1.2397
CCA0398S0002	evm.TU.Contig1913.2	Contig1913	scaffold9939	34296	43082	-	0.0707828	0.0229392	0.048531
CCA0398S0004	evm.TU.Contig1913.4	Contig1913	scaffold9939	48687	48862	-	41.0883	18.7101	0
CCA0399S0001	evm.TU.Contig19159.1	Contig19159	scaffold9971	1969	3202	-	0	0	0
CCA0400S0001	evm.TU.Contig19162.1	Contig19162	scaffold9975	1564	1866	-	0	7.52312	3.53139
CCA0401S0001	evm.TU.Contig1919.1	Contig1919	scaffold10003	7217	8565	+	0	0	0.177421
CCA0402S0001	evm.TU.Contig19224.1	Contig19224	scaffold10042	202	861	+	7.64059	2.85545	3.00966
CCA0403S0001	evm.TU.Contig1923.1	Contig1923	scaffold10048	3112	7107	+	5.67345	71.5316	25.256
CCA0403S0002	evm.TU.Contig1923.2	Contig1923	scaffold10048	11394	13648	+	6.81228	7.41116	12.3599
CCA0403S0003	evm.TU.Contig1923.3	Contig1923	scaffold10048	16246	19839	+	28.4974	18.4435	20.3653
CCA0403S0004	evm.TU.Contig1923.4	Contig1923	scaffold10048	24337	28489	-	0.0636351	0.433058	0.370863
CCA0403S0007	evm.TU.Contig1923.7	Contig1923	scaffold10048	39861	42114	-	10.8209	10.4724	7.93233
CCA0403S0008	evm.TU.Contig1923.8	Contig1923	scaffold10048	39861	51656	+	15.3738	23.9258	15.0871
CCA0403S0009	evm.TU.Contig1923.9	Contig1923	scaffold10048	52003	56930	-	57.8726	55.5585	33.09
CCA0403S0011	evm.TU.Contig1923.11	Contig1923	scaffold10048	63514	64818	-	3.59571	1.80644	7.48821
CCA0403S0012	evm.TU.Contig1923.12	Contig1923	scaffold10048	65658	70772	-	30.864	54.9031	44.4897
CCA0403S0013	evm.TU.Contig1923.13	Contig1923	scaffold10048	74501	78575	+	51.5547	66.0078	62.2595
CCA0403S0014	evm.TU.Contig1923.14	Contig1923	scaffold10048	85196	87195	+	0.0561142	0.518333	0.981057
CCA0403S0015	evm.TU.Contig1923.15	Contig1923	scaffold10048	93410	96951	+	24.2097	29.2357	21.6893
CCA0403S0016	evm.TU.Contig1923.16	Contig1923	scaffold10048	97382	99840	+	5.61697	18.5363	46.3158
CCA0403S0017	evm.TU.Contig1923.17	Contig1923	scaffold10048	101082	107909	+	5.82802	5.65809	7.09105
CCA0403S0019	evm.TU.Contig1923.19	Contig1923	scaffold10048	109944	110903	-	219.909	233.088	153.398
CCA0403S0020	evm.TU.Contig1923.20	Contig1923	scaffold10048	113722	116716	+	8.65076	6.1376	8.7716
CCA0403S0021	evm.TU.Contig1923.21	Contig1923	scaffold10048	117620	119466	-	0.327715	0	0.404355
CCA0403S0022	evm.TU.Contig1923.22	Contig1923	scaffold10048	123775	125034	+	1.98468	3.58992	1.07388
CCA0403S0023	evm.TU.Contig1923.23	Contig1923	scaffold10048	123775	128949	-	8.18217	5.34993	7.98472
CCA0403S0024	evm.TU.Contig1923.24	Contig1923	scaffold10048	135271	137295	-	144.708	77.7257	104.233
CCA0404S0001	evm.TU.Contig1924.1	Contig1924	scaffold10059	231	636	-	0	0	0
CCA0405S0001	evm.TU.Contig1926.1	Contig1926	scaffold10081	10252	12342	+	0.593315	3.58605	0.566552
CCA0406S0001	evm.TU.Contig19280.1	Contig19280	scaffold10104	1	1984	-	0.236452	0.0176534	0.149414
CCA0407S0001	evm.TU.Contig1935.1	Contig1935	scaffold10179	1151	2795	+	0	0	0
CCA0407S0002	evm.TU.Contig1935.2	Contig1935	scaffold10179	3576	3749	-	0	0	0
CCA0408S0003	evm.TU.Contig1937.3	Contig1937	scaffold10201	22247	23690	+	0.502456	0.128562	0.54394
CCA0409S0001	evm.TU.Contig19450.1	Contig19450	scaffold10287	2477	2995	+	0.363196	0	0
CCA0409S0002	evm.TU.Contig19450.2	Contig19450	scaffold10287	3124	3373	+	2.08356	0	0
CCA0410S0001	evm.TU.Contig1948.1	Contig1948	scaffold10317	38630	40897	-	0	0.0307256	0
CCA0411S0001	evm.TU.Contig19492.1	Contig19492	scaffold10330	50	1983	-	0.184559	0.426245	0.263996
CCA0412S0002	evm.TU.Contig1956.2	Contig1956	scaffold10404	15112	21753	+	0.68298	0.73201	0.55825
CCA0413S0001	evm.TU.Contig1961.1	Contig1961	scaffold10458	12144	16556	-	54.9963	79.8691	50.125
CCA0413S0002	evm.TU.Contig1961.2	Contig1961	scaffold10458	24475	28228	+	0.592265	0.396887	0.819509
CCA0413S0003	evm.TU.Contig1961.3	Contig1961	scaffold10458	31686	33011	-	2.29403	0.643578	2.67654
CCA0414S0001	evm.TU.Contig1963.1	Contig1963	scaffold10480	6217	6616	+	0	0	0
CCA0415S0001	evm.TU.Contig1967.1	Contig1967	scaffold10524	28164	31110	+	0.496298	0	0.393203
CCA0416S0001	evm.TU.Contig1970.1	Contig1970	scaffold10558	18252	18867	+	0	0	0
CCA0416S0002	evm.TU.Contig1970.2	Contig1970	scaffold10558	26090	27256	-	1.29849	1.2631	3.80961
CCA0416S0004	evm.TU.Contig1970.4	Contig1970	scaffold10558	40734	41851	+	0	0	0
CCA0417S0001	evm.TU.Contig1983.1	Contig1983	scaffold10699	245	867	+	0.0431673	0	0.241627
CCA0418S0001	evm.TU.Contig19912.1	Contig19912	scaffold10790	110	331	+	0	0	0
CCA0419S0001	evm.TU.Contig1995.1	Contig1995	scaffold10830	613	1861	+	1.22881	2.13673	1.07221
CCA0420S0002	evm.TU.Contig2.2	Contig2	scaffold10884	5933	6232	-	3.00081	0	0.761597
CCA0420S0003	evm.TU.Contig2.3	Contig2	scaffold10884	6237	9449	-	0.16407	0.0798533	0
CCA0420S0004	evm.TU.Contig2.4	Contig2	scaffold10884	10847	13587	-	1.07763	0.262285	0.830921
CCA0420S0005	evm.TU.Contig2.5	Contig2	scaffold10884	14827	15714	+	931.533	410.652	550.163
CCA0420S0006	evm.TU.Contig2.6	Contig2	scaffold10884	16029	17897	-	5.85236	2.69461	2.33893
CCA0420S0007	evm.TU.Contig2.7	Contig2	scaffold10884	17955	19901	+	16.9991	6.44058	6.98562
CCA0420S0008	evm.TU.Contig2.8	Contig2	scaffold10884	23665	23994	+	1808.43	480.788	722.009
CCA0420S0009	evm.TU.Contig2.9	Contig2	scaffold10884	25221	26045	+	73.3498	22.654	24.2861
CCA0420S0010	evm.TU.Contig2.10	Contig2	scaffold10884	21312	26546	-	58.1269	30.9401	48.6213
CCA0421S0001	evm.TU.Contig20.1	Contig20	scaffold10885	64	591	+	1.28692	2.27926	2.04443
CCA0421S0002	evm.TU.Contig20.2	Contig20	scaffold10885	4603	5889	-	1102.66	564.931	759.911
CCA0421S0003	evm.TU.Contig20.3	Contig20	scaffold10885	7308	7887	-	18.7958	6.90802	9.54172
CCA0421S0004	evm.TU.Contig20.4	Contig20	scaffold10885	7927	10080	-	17.5813	6.97218	11.7995
CCA0421S0005	evm.TU.Contig20.5	Contig20	scaffold10885	11751	12074	-	253.572	131.597	100.135
CCA0422S0001	evm.TU.Contig2003.1	Contig2003	scaffold10919	413	2084	+	1.74603	0.728628	1.23324
CCA0423S0001	evm.TU.Contig20039.1	Contig20039	scaffold10928	37	1110	+	6.03488	3.45875	6.68987
CCA0424S0001	evm.TU.Contig20096.1	Contig20096	scaffold10990	8	504	+	0	0	0
CCA0425S0001	evm.TU.Contig20098.1	Contig20098	scaffold10992	516	6354	-	7.79056	2.88944	4.71831
CCA0426S0001	evm.TU.Contig201.1	Contig201	scaffold10994	2146	2823	-	424.291	134.801	256.083
CCA0426S0002	evm.TU.Contig201.2	Contig201	scaffold10994	3706	4134	-	1591.96	552.419	941.782
CCA0427S0001	evm.TU.Contig2010.1	Contig2010	scaffold10995	2279	2850	-	0	0	0
CCA0428S0001	evm.TU.Contig2020.1	Contig2020	scaffold11103	507	1629	+	0	0.187878	0
CCA0428S0002	evm.TU.Contig2020.2	Contig2020	scaffold11103	1636	4426	+	0	0	0
CCA0429S0001	evm.TU.Contig20210.1	Contig20210	scaffold11115	886	3066	+	0.140187	1.06003	1.51346
CCA0430S0001	evm.TU.Contig20264.1	Contig20264	scaffold11172	23	439	-	0	5.07281	0.410886
CCA0431S0001	evm.TU.Contig2027.1	Contig2027	scaffold11178	15209	16687	+	1.31058	2.58398	2.00502
CCA0431S0003	evm.TU.Contig2027.3	Contig2027	scaffold11178	23564	24550	-	271.875	340.482	225.268
CCA0431S0004	evm.TU.Contig2027.4	Contig2027	scaffold11178	24651	24962	+	1.19652	2.94609	2.44683
CCA0431S0005	evm.TU.Contig2027.5	Contig2027	scaffold11178	31789	32073	+	5.14472	5.10623	6.17665
CCA0431S0006	evm.TU.Contig2027.6	Contig2027	scaffold11178	34457	45162	+	7.93547	3.90729	6.71201
CCA0431S0007	evm.TU.Contig2027.7	Contig2027	scaffold11178	45466	50123	+	26.8532	11.8827	20.7742
CCA0431S0010	evm.TU.Contig2027.10	Contig2027	scaffold11178	98607	100079	-	19.4748	9.48537	15.0468
CCA0432S0001	evm.TU.Contig20296.1	Contig20296	scaffold11206	74	2165	-	7.3633	20.4447	22.6478
CCA0433S0001	evm.TU.Contig2033.1	Contig2033	scaffold11244	1818	2746	-	0	0	0
CCA0434S0001	evm.TU.Contig2037.1	Contig2037	scaffold11287	581	1750	+	6.43501	6.55892	7.67936
CCA0434S0002	evm.TU.Contig2037.2	Contig2037	scaffold11287	2509	2762	-	0	0	0
CCA0435S0001	evm.TU.Contig20439.1	Contig20439	scaffold11360	12	545	-	0.457705	0	0.0392081
CCA0436S0001	evm.TU.Contig2044.1	Contig2044	scaffold11361	782	3950	-	0.330533	0.160737	2.15282
CCA0437S0001	evm.TU.Contig2050.1	Contig2050	scaffold11426	5735	7071	-	0.151694	0.233089	0.369788
CCA0438S0001	evm.TU.Contig2057.1	Contig2057	scaffold11499	864	4072	-	11.4952	24.91	17.6481
CCA0439S0001	evm.TU.Contig20576.1	Contig20576	scaffold11505	4235	7585	-	1.49139	1.93915	4.52922
CCA0440S0001	evm.TU.Contig20681.1	Contig20681	scaffold11621	177	410	-	0	0	2.67446
CCA0441S0001	evm.TU.Contig20754.1	Contig20754	scaffold11700	286	500	+	0	0	0
CCA0442S0001	evm.TU.Contig20760.1	Contig20760	scaffold11707	71	286	+	0	0	0
CCA0443S0001	evm.TU.Contig2083.1	Contig2083	scaffold11782	335	1730	-	1.17085	2.86083	4.53864
CCA0444S0001	evm.TU.Contig20950.1	Contig20950	scaffold11913	56	298	+	0	0	0
CCA0445S0001	evm.TU.Contig20953.1	Contig20953	scaffold11916	3818	4234	+	0	0	0
CCA0446S0001	evm.TU.Contig20954.1	Contig20954	scaffold11917	107	337	+	0	0	0
CCA0447S0001	evm.TU.Contig20998.1	Contig20998	scaffold11964	3469	4313	+	2.08826	2.18912	2.46585
CCA0448S0001	evm.TU.Contig21.1	Contig21	scaffold11966	74	403	-	143.655	156.249	338.05
CCA0448S0005	evm.TU.Contig21.5	Contig21	scaffold11966	13964	17958	-	6.97261	3.87586	2.71459
CCA0449S0001	evm.TU.Contig2105.1	Contig2105	scaffold12023	7204	7702	+	32.1211	30.7744	35.4702
CCA0449S0002	evm.TU.Contig2105.2	Contig2105	scaffold12023	7965	9914	-	0	0	0
CCA0449S0003	evm.TU.Contig2105.3	Contig2105	scaffold12023	14594	16094	-	0.406196	0.355551	0.167086
CCA0449S0004	evm.TU.Contig2105.4	Contig2105	scaffold12023	18440	19360	+	0.986188	0.453539	1.13336
CCA0450S0001	evm.TU.Contig21059.1	Contig21059	scaffold12033	7	522	-	0	0	0
CCA0451S0001	evm.TU.Contig21115.1	Contig21115	scaffold12094	1181	1626	+	0	0	0
CCA0452S0001	evm.TU.Contig2112.1	Contig2112	scaffold12099	1410	1976	+	0	0	0
CCA0452S0002	evm.TU.Contig2112.2	Contig2112	scaffold12099	5400	16308	+	0	0	0
CCA0452S0004	evm.TU.Contig2112.4	Contig2112	scaffold12099	49116	49544	+	0	0	0
CCA0453S0002	evm.TU.Contig2120.2	Contig2120	scaffold12187	42052	45185	+	0	0	0
CCA0454S0001	evm.TU.Contig2125.1	Contig2125	scaffold12240	271	2075	+	0.0329969	0.032087	0
CCA0455S0001	evm.TU.Contig2128.1	Contig2128	scaffold12273	123	3248	-	12.2297	51.7428	14.9227
CCA0456S0001	evm.TU.Contig2133.1	Contig2133	scaffold12327	7903	9804	+	3.63307	11.3026	7.34108
CCA0456S0002	evm.TU.Contig2133.2	Contig2133	scaffold12327	14481	15432	-	0	0	0.17816
CCA0456S0003	evm.TU.Contig2133.3	Contig2133	scaffold12327	15477	21219	-	4.31979	5.19952	5.88136
CCA0457S0001	evm.TU.Contig2142.1	Contig2142	scaffold12425	685	3647	+	4.84001	4.43039	6.06479
CCA0458S0001	evm.TU.Contig21521.1	Contig21521	scaffold12537	4808	5053	-	0	0	5.39998
CCA0459S0001	evm.TU.Contig2153.1	Contig2153	scaffold12546	18	500	-	6.89188	3.15274	10.1193
CCA0460S0001	evm.TU.Contig2154.1	Contig2154	scaffold12557	13730	14969	+	0	0	0
CCA0461S0001	evm.TU.Contig21551.1	Contig21551	scaffold12570	39	425	+	0	0	0
CCA0462S0002	evm.TU.Contig2156.2	Contig2156	scaffold12578	9560	9877	+	8.0965	2.12418	11.0615
CCA0462S0003	evm.TU.Contig2156.3	Contig2156	scaffold12578	9888	12261	+	0	0.471931	0.744575
CCA0462S0005	evm.TU.Contig2156.5	Contig2156	scaffold12578	23541	23855	-	0	0	0
CCA0463S0001	evm.TU.Contig21581.1	Contig21581	scaffold12602	227	382	+	0	0	0
CCA0464S0001	evm.TU.Contig2177.1	Contig2177	scaffold12805	1431	1815	+	14.7264	15.0758	41.993
CCA0464S0002	evm.TU.Contig2177.2	Contig2177	scaffold12805	9374	18432	-	0	0	0
CCA0464S0003	evm.TU.Contig2177.3	Contig2177	scaffold12805	36952	40934	-	8.80826	17.8532	12.225
CCA0465S0001	evm.TU.Contig21802.1	Contig21802	scaffold12841	355	1101	-	0.262683	0.187791	0.264585
CCA0466S0001	evm.TU.Contig2189.1	Contig2189	scaffold12934	419	654	-	0	0	0
CCA0467S0001	evm.TU.Contig2196.1	Contig2196	scaffold13010	244	1054	-	2.27408	2.15714	3.09832
CCA0467S0002	evm.TU.Contig2196.2	Contig2196	scaffold13010	4361	4798	-	0	0	0
CCA0468S0001	evm.TU.Contig2199.1	Contig2199	scaffold13042	61	1023	+	0.0445513	0.0866662	0.0916272
CCA0469S0001	evm.TU.Contig22.1	Contig22	scaffold13052	3469	7933	-	771.88	348.911	679.846
CCA0470S0001	evm.TU.Contig2200.1	Contig2200	scaffold13053	4660	6867	-	1.52333	0.416063	2.66882
CCA0471S0001	evm.TU.Contig2201.1	Contig2201	scaffold13064	1777	2154	-	10.383	1.04069	1.64084
CCA0472S0001	evm.TU.Contig22031.1	Contig22031	scaffold13087	8	282	-	0	2.55688	0.843482
CCA0473S0001	evm.TU.Contig22054.1	Contig22054	scaffold13112	111	332	+	0	0	0
CCA0474S0001	evm.TU.Contig2217.1	Contig2217	scaffold13238	981	2306	-	0.235537	0.114582	0.121096
CCA0475S0001	evm.TU.Contig2236.1	Contig2236	scaffold13447	3862	5900	+	0.0649558	0.736749	0.445656
CCA0476S0001	evm.TU.Contig2237.1	Contig2237	scaffold13458	7207	7413	+	0	0	0
CCA0476S0002	evm.TU.Contig2237.2	Contig2237	scaffold13458	9447	10483	+	0	0.272692	1.19965
CCA0477S0001	evm.TU.Contig2238.1	Contig2238	scaffold13469	199	3222	+	94.5859	159.492	68.442
CCA0478S0001	evm.TU.Contig2239.1	Contig2239	scaffold13480	2724	3518	-	0	0	1.59657
CCA0479S0001	evm.TU.Contig2247.1	Contig2247	scaffold13565	3426	3983	+	0	0	0
CCA0480S0001	evm.TU.Contig225.1	Contig225	scaffold13598	60	434	-	1848.7	355.67	1061.02
CCA0481S0001	evm.TU.Contig2250.1	Contig2250	scaffold13599	886	2871	-	0.181889	0.458456	0.988718
CCA0481S0003	evm.TU.Contig2250.2_evm.TU.Contig2250.3	Contig2250	scaffold13599	7856	9872	-	3.84912	7.90468	11.8366
CCA0482S0001	evm.TU.Contig22500.1	Contig22500	scaffold13600	1090	1654	+	0	0	0
CCA0483S0001	evm.TU.Contig22554.1	Contig22554	scaffold13658	45	298	+	5.81877	1.95292	11.1785
CCA0484S0001	evm.TU.Contig22570.1	Contig22570	scaffold13676	13	249	+	58.2909	46.0762	57.8902
CCA0485S0001	evm.TU.Contig2260.1	Contig2260	scaffold13708	389	3229	+	5.75985	3.21559	6.44393
CCA0486S0001	evm.TU.Contig22632.1	Contig22632	scaffold13742	318	944	+	0	0	0
CCA0487S0001	evm.TU.Contig22637.1	Contig22637	scaffold13747	415	844	+	0	1.95292	0
CCA0488S0001	evm.TU.Contig2264.1	Contig2264	scaffold13750	4069	5755	-	14.7254	1.22159	0.801144
CCA0489S0001	evm.TU.Contig2268.1	Contig2268	scaffold13793	122	3076	+	9.59983	5.07415	7.35101
CCA0490S0001	evm.TU.Contig22697.1	Contig22697	scaffold13810	855	1314	+	0	0	0
CCA0491S0001	evm.TU.Contig2283.1	Contig2283	scaffold13954	2520	3230	-	5.53664	8.04036	47.8515
CCA0492S0001	evm.TU.Contig22936.1	Contig22936	scaffold14071	110	680	+	0	0	0
CCA0493S0001	evm.TU.Contig22982.1	Contig22982	scaffold14122	528	1094	-	0	0	0
CCA0494S0001	evm.TU.Contig22985.1	Contig22985	scaffold14125	49	249	+	0	0	0
CCA0494S0002	evm.TU.Contig22985.2	Contig22985	scaffold14125	657	1037	-	58.9324	14.7138	1.6001
CCA0495S0001	evm.TU.Contig23.1	Contig23	scaffold14140	406	2907	-	3.82057	4.27519	3.01179
CCA0495S0004	evm.TU.Contig23.4	Contig23	scaffold14140	4359	4661	-	22.6299	10.4662	7.9142
CCA0495S0005	evm.TU.Contig23.5	Contig23	scaffold14140	4922	6103	-	568.009	217.785	444.564
CCA0495S0006	evm.TU.Contig23.6	Contig23	scaffold14140	6406	6597	-	714.527	302.546	505.834
CCA0495S0007	evm.TU.Contig23.7	Contig23	scaffold14140	7753	8304	-	257.881	167.505	321.385
CCA0496S0001	evm.TU.Contig2304.1	Contig2304	scaffold14186	2535	3269	+	2.40705	4.30075	2.8597
CCA0497S0001	evm.TU.Contig2305.1	Contig2305	scaffold14197	41	3631	-	3.17885	5.30384	4.51347
CCA0498S0001	evm.TU.Contig2315.1	Contig2315	scaffold14305	3672	5011	+	0	0	0
CCA0499S0001	evm.TU.Contig2318.1	Contig2318	scaffold14335	3618	6744	+	5.92736	9.06734	5.47059
CCA0500S0004	evm.TU.Contig232.4	Contig232	scaffold14356	33539	35357	-	0	0.339116	0.107585
CCA0500S0009	evm.TU.Contig232.9	Contig232	scaffold14356	98979	99901	-	0	0	0
CCA0500S0010	evm.TU.Contig232.10	Contig232	scaffold14356	115511	117554	-	0.603532	0	0.306416
CCA0500S0011	evm.TU.Contig232.11	Contig232	scaffold14356	117614	118239	-	2.50785	0.0533812	0.478516
CCA0500S0012	evm.TU.Contig232.12	Contig232	scaffold14356	118315	119083	-	9.18464	0	0.896702
CCA0500S0013	evm.TU.Contig232.13	Contig232	scaffold14356	143531	150820	+	0	0	0
CCA0500S0015	evm.TU.Contig232.15	Contig232	scaffold14356	174803	175846	+	0	0	0
CCA0500S0016	evm.TU.Contig232.16	Contig232	scaffold14356	181032	182860	-	0	0	0
CCA0500S0017	evm.TU.Contig232.17	Contig232	scaffold14356	199017	199506	+	0	0	0
CCA0500S0019	evm.TU.Contig232.19	Contig232	scaffold14356	263316	263717	-	0	0	0.227184
CCA0500S0020	evm.TU.Contig232.20	Contig232	scaffold14356	263763	271522	-	0.447525	0.0953953	0.243901
CCA0500S0021	evm.TU.Contig232.21	Contig232	scaffold14356	309126	309428	+	0	0	0
CCA0500S0022	evm.TU.Contig232.22	Contig232	scaffold14356	309655	309939	+	0	0	0
CCA0500S0023	evm.TU.Contig232.23	Contig232	scaffold14356	354479	354989	+	0	0	0
CCA0500S0024	evm.TU.Contig232.24	Contig232	scaffold14356	370312	370822	-	0	0	0
CCA0500S0025	evm.TU.Contig232.25	Contig232	scaffold14356	383263	385500	+	0	0	0
CCA0500S0026	evm.TU.Contig232.26	Contig232	scaffold14356	388343	388675	+	28.8428	14.3634	14.1459
CCA0500S0028	evm.TU.Contig232.28	Contig232	scaffold14356	406277	407330	-	0	0	3.24756
CCA0500S0031	evm.TU.Contig232.31	Contig232	scaffold14356	509397	514451	+	0	0	0
CCA0500S0032	evm.TU.Contig232.32	Contig232	scaffold14356	516243	522839	-	0.232071	0.164084	0.585841
CCA0500S0033	evm.TU.Contig232.33	Contig232	scaffold14356	526790	532448	-	0.361655	0.419454	0.575796
CCA0500S0036	evm.TU.Contig232.36	Contig232	scaffold14356	567179	569752	-	0	0.902672	2.48118
CCA0500S0038	evm.TU.Contig232.38	Contig232	scaffold14356	579771	581672	+	21.9608	64.7171	19.08
CCA0500S0039	evm.TU.Contig232.39	Contig232	scaffold14356	593552	598153	-	17.9644	5.71664	14.8702
CCA0500S0040	evm.TU.Contig232.40	Contig232	scaffold14356	601921	604925	-	20.7756	18.8119	19.4348
CCA0500S0041	evm.TU.Contig232.41	Contig232	scaffold14356	607195	614368	+	22.5714	17.028	28.2923
CCA0500S0042	evm.TU.Contig232.42	Contig232	scaffold14356	615752	618334	+	6.06421	2.88182	2.10674
CCA0500S0043	evm.TU.Contig232.43	Contig232	scaffold14356	620065	621372	-	19.4509	11.0981	5.28512
CCA0500S0044	evm.TU.Contig232.44	Contig232	scaffold14356	627775	629590	+	2.57721	2.5824	4.45733
CCA0500S0045	evm.TU.Contig232.45	Contig232	scaffold14356	642329	645555	+	23.6318	9.32855	11.815
CCA0500S0046	evm.TU.Contig232.46	Contig232	scaffold14356	646987	647427	-	0.390083	1.02293	0.356321
CCA0500S0047	evm.TU.Contig232.47	Contig232	scaffold14356	647928	651215	-	50.4249	43.5989	43.1195
CCA0500S0048	evm.TU.Contig232.48	Contig232	scaffold14356	652069	657302	+	12.8878	10.2463	11.8097
CCA0500S0049	evm.TU.Contig232.49	Contig232	scaffold14356	660718	664926	-	14.5063	11.5912	122.532
CCA0500S0050	evm.TU.Contig232.50	Contig232	scaffold14356	678633	683997	-	16.6742	33.9291	16.3687
CCA0500S0051	evm.TU.Contig232.51	Contig232	scaffold14356	688510	691799	+	0	0	0
CCA0500S0052	evm.TU.Contig232.52	Contig232	scaffold14356	693618	694007	+	0	0.236349	0
CCA0500S0053	evm.TU.Contig232.53	Contig232	scaffold14356	693756	698795	-	13.1854	6.24479	10.2697
CCA0500S0054	evm.TU.Contig232.54	Contig232	scaffold14356	702129	703482	+	0.0572431	0.166979	0.147175
CCA0500S0055	evm.TU.Contig232.55	Contig232	scaffold14356	737269	739090	+	7.43691	14.9092	4.75068
CCA0500S0056	evm.TU.Contig232.56	Contig232	scaffold14356	740597	744284	-	0.0444181	0.561261	0.342636
CCA0500S0058	evm.TU.Contig232.58	Contig232	scaffold14356	847918	850805	+	0	0	0
CCA0500S0059	evm.TU.Contig232.59	Contig232	scaffold14356	871689	877066	-	10.3237	10.9967	19.6337
CCA0500S0060	evm.TU.Contig232.60	Contig232	scaffold14356	882304	887706	-	9.00532	9.12601	17.977
CCA0500S0061	evm.TU.Contig232.61	Contig232	scaffold14356	902894	910802	+	17.6478	8.77841	10.2974
CCA0500S0062	evm.TU.Contig232.62	Contig232	scaffold14356	940281	951381	-	14.8855	14.2172	12.0993
CCA0500S0063	evm.TU.Contig232.63	Contig232	scaffold14356	954590	957515	-	2.11553	9.965	3.15662
CCA0500S0064	evm.TU.Contig232.64	Contig232	scaffold14356	958904	962012	-	81.0048	67.8297	79.6049
CCA0500S0065	evm.TU.Contig232.65	Contig232	scaffold14356	979729	981894	+	31.1685	23.616	24.8048
CCA0500S0066	evm.TU.Contig232.66	Contig232	scaffold14356	982777	991306	-	3.66051	3.59942	9.7004
CCA0500S0067	evm.TU.Contig232.67	Contig232	scaffold14356	997856	999344	-	0.706112	0.0403977	0.384422
CCA0500S0068	evm.TU.Contig232.68	Contig232	scaffold14356	1001699	1006222	-	158.856	71.2856	109.075
CCA0500S0069	evm.TU.Contig232.69	Contig232	scaffold14356	1008353	1008687	+	0	0	0
CCA0500S0070	evm.TU.Contig232.70	Contig232	scaffold14356	1010597	1019004	-	10.0996	15.0736	13.9416
CCA0500S0071	evm.TU.Contig232.71	Contig232	scaffold14356	1024837	1025809	+	54.0164	65.1796	50.1019
CCA0500S0072	evm.TU.Contig232.72	Contig232	scaffold14356	1030449	1038101	-	7.98606	8.37902	6.69453
CCA0500S0073	evm.TU.Contig232.73	Contig232	scaffold14356	1036837	1037672	+	0	0	0.282648
CCA0500S0074	evm.TU.Contig232.74	Contig232	scaffold14356	1048996	1051339	-	6.82404	5.41516	5.52162
CCA0500S0075	evm.TU.Contig232.75	Contig232	scaffold14356	1060302	1064692	-	65.5046	21.23	30.2769
CCA0500S0076	evm.TU.Contig232.76	Contig232	scaffold14356	1079694	1082311	-	41.9389	25.6924	40.2264
CCA0500S0077	evm.TU.Contig232.77	Contig232	scaffold14356	1088607	1089592	-	0.0605942	0.117913	53.3337
CCA0500S0078	evm.TU.Contig232.78	Contig232	scaffold14356	1089646	1090367	-	0	0	5.7194
CCA0500S0081	evm.TU.Contig232.81	Contig232	scaffold14356	1104906	1106744	-	0.691827	1.37467	0.866155
CCA0500S0082	evm.TU.Contig232.82	Contig232	scaffold14356	1126622	1127325	-	0	0	0.0725568
CCA0500S0083	evm.TU.Contig232.83	Contig232	scaffold14356	1127826	1128278	-	0	0	0
CCA0500S0084	evm.TU.Contig232.84	Contig232	scaffold14356	1137446	1140289	+	0.0510709	1.52249	1.03301
CCA0500S0085	evm.TU.Contig232.85	Contig232	scaffold14356	1142344	1143910	+	0.0363291	1.23654	0.859282
CCA0500S0086	evm.TU.Contig232.86	Contig232	scaffold14356	1162314	1167231	+	5.47425	2.55365	5.67271
CCA0500S0088	evm.TU.Contig232.88	Contig232	scaffold14356	1176925	1183586	-	17.247	24.8359	11.8747
CCA0500S0089	evm.TU.Contig232.89	Contig232	scaffold14356	1190036	1191539	+	0.528551	2.17793	3.08031
CCA0500S0090	evm.TU.Contig232.90	Contig232	scaffold14356	1196525	1199492	+	143.29	275.797	91.3012
CCA0500S0092	evm.TU.Contig232.91_evm.TU.Contig232.92	Contig232	scaffold14356	1201670	1209807	-	52.4482	46.146	52.9358
CCA0500S0093	evm.TU.Contig232.93	Contig232	scaffold14356	1220160	1225903	-	23.507	32.1513	23.9583
CCA0500S0094	evm.TU.Contig232.94	Contig232	scaffold14356	1233324	1235007	+	32.5313	27.6402	31.9665
CCA0500S0095	evm.TU.Contig232.95	Contig232	scaffold14356	1235257	1237330	+	32.5124	31.3016	32.5006
CCA0500S0096	evm.TU.Contig232.96	Contig232	scaffold14356	1241065	1244569	+	34.5477	1.03386	62.814
CCA0500S0097	evm.TU.Contig232.97	Contig232	scaffold14356	1245270	1247813	+	3.59102	2.37149	2.01585
CCA0500S0098	evm.TU.Contig232.98	Contig232	scaffold14356	1248483	1250435	+	4.38264	3.883	3.17613
CCA0500S0099	evm.TU.Contig232.99	Contig232	scaffold14356	1252867	1255853	-	4.54588	4.28777	4.38642
CCA0500S0100	evm.TU.Contig232.100	Contig232	scaffold14356	1264145	1266316	-	7.65126	6.00304	5.35344
CCA0500S0101	evm.TU.Contig232.101	Contig232	scaffold14356	1270922	1272303	+	0	0	0.254064
CCA0500S0102	evm.TU.Contig232.102	Contig232	scaffold14356	1276961	1280581	+	16.1121	8.47956	7.42902
CCA0500S0103	evm.TU.Contig232.103	Contig232	scaffold14356	1281267	1283106	+	4.2781	2.85368	0
CCA0500S0104	evm.TU.Contig232.104	Contig232	scaffold14356	1299005	1302532	+	0	0.0118535	0
CCA0500S0105	evm.TU.Contig232.105	Contig232	scaffold14356	1308339	1315067	+	62.5484	129.711	81.3013
CCA0500S0106	evm.TU.Contig232.106	Contig232	scaffold14356	1319447	1325187	+	13.1682	23.0119	20.2524
CCA0500S0107	evm.TU.Contig232.107	Contig232	scaffold14356	1325627	1326503	-	0.506535	2.32398	1.48803
CCA0500S0108	evm.TU.Contig232.108	Contig232	scaffold14356	1330049	1331585	-	0.18997	0.0923634	1.10708
CCA0500S0109	evm.TU.Contig232.109	Contig232	scaffold14356	1332610	1337907	-	88.8306	43.7962	52.8193
CCA0500S0110	evm.TU.Contig232.110	Contig232	scaffold14356	1350117	1355736	+	17.965	25.93	26.0223
CCA0500S0111	evm.TU.Contig232.111	Contig232	scaffold14356	1356466	1360897	-	4.341	3.49604	5.80794
CCA0500S0112	evm.TU.Contig232.112	Contig232	scaffold14356	1369003	1369188	+	0	0	0
CCA0500S0113	evm.TU.Contig232.113	Contig232	scaffold14356	1379059	1385384	+	27.4219	19.7661	22.2991
CCA0500S0114	evm.TU.Contig232.114	Contig232	scaffold14356	1385407	1403036	-	11.8404	7.52265	10.6514
CCA0500S0115	evm.TU.Contig232.115	Contig232	scaffold14356	1402951	1405536	+	23.175	33.9388	22.5211
CCA0500S0116	evm.TU.Contig232.116	Contig232	scaffold14356	1406386	1411711	-	12.28	3.62483	11.5667
CCA0500S0117	evm.TU.Contig232.117	Contig232	scaffold14356	1416529	1436605	-	6.45887	6.16718	4.49201
CCA0500S0118	evm.TU.Contig232.118	Contig232	scaffold14356	1449014	1451705	+	163.889	283.116	237.643
CCA0500S0121	evm.TU.Contig232.121	Contig232	scaffold14356	1471928	1475569	+	39.705	23.0814	34.3525
CCA0500S0123	evm.TU.Contig232.123	Contig232	scaffold14356	1488798	1490307	+	14.1133	6.86141	37.2555
CCA0500S0124	evm.TU.Contig232.124	Contig232	scaffold14356	1490777	1500239	-	8.52216	10.535	3.27262
CCA0500S0125	evm.TU.Contig232.125	Contig232	scaffold14356	1503542	1510029	-	2.06023	1.76854	7.07236
CCA0500S0127	evm.TU.Contig232.127	Contig232	scaffold14356	1537461	1547692	+	14.9801	11.7238	12.4037
CCA0500S0128	evm.TU.Contig232.128	Contig232	scaffold14356	1548799	1554641	-	10.4117	6.30334	8.89738
CCA0500S0129	evm.TU.Contig232.129	Contig232	scaffold14356	1561227	1566620	-	14.1634	51.611	43.9156
CCA0500S0133	evm.TU.Contig232.130_evm.TU.Contig232.131_evm.TU.Contig232.133	Contig232	scaffold14356	1576824	1604170	-	0.127873	0	0.131482
CCA0500S0134	evm.TU.Contig232.134	Contig232	scaffold14356	1623122	1625606	-	0.713334	0.104055	0.403469
CCA0500S0135	evm.TU.Contig232.135	Contig232	scaffold14356	1629391	1632966	-	4.63194	2.8181	4.1476
CCA0500S0136	evm.TU.Contig232.136	Contig232	scaffold14356	1634666	1637712	-	0.0595862	0.0289697	0.0306397
CCA0500S0137	evm.TU.Contig232.137	Contig232	scaffold14356	1642630	1644364	-	0	0	0
CCA0500S0138	evm.TU.Contig232.138	Contig232	scaffold14356	1653462	1655200	+	0	0	0
CCA0500S0139	evm.TU.Contig232.139	Contig232	scaffold14356	1658427	1659992	+	0	0	0.104784
CCA0500S0140	evm.TU.Contig232.140	Contig232	scaffold14356	1667283	1671018	+	23.0261	17.6538	28.2244
CCA0500S0141	evm.TU.Contig232.141	Contig232	scaffold14356	1672339	1678980	-	2.65759	1.31931	0.96721
CCA0500S0142	evm.TU.Contig232.142	Contig232	scaffold14356	1683469	1689890	-	7.34005	7.90325	14.1576
CCA0500S0143	evm.TU.Contig232.143	Contig232	scaffold14356	1691193	1708513	+	31.1478	13.1257	18.5382
CCA0500S0144	evm.TU.Contig232.144	Contig232	scaffold14356	1709299	1714532	-	8.03903	12.2943	9.94912
CCA0500S0145	evm.TU.Contig232.145	Contig232	scaffold14356	1715726	1720653	-	28.6471	41.4889	32.0048
CCA0500S0146	evm.TU.Contig232.146	Contig232	scaffold14356	1721675	1727120	-	35.805	14.0681	28.7988
CCA0500S0147	evm.TU.Contig232.147	Contig232	scaffold14356	1729202	1733638	-	18.9007	21.9122	15.2241
CCA0500S0148	evm.TU.Contig232.148	Contig232	scaffold14356	1738477	1740631	+	5.13786	11.611	7.52705
CCA0500S0149	evm.TU.Contig232.149	Contig232	scaffold14356	1745632	1746786	+	14.5204	16.1961	21.3374
CCA0500S0150	evm.TU.Contig232.150	Contig232	scaffold14356	1748362	1751336	-	29.3296	14.7773	11.8176
CCA0500S0151	evm.TU.Contig232.151	Contig232	scaffold14356	1751789	1763901	-	4.64942	2.51211	3.479
CCA0500S0152	evm.TU.Contig232.152	Contig232	scaffold14356	1763922	1771859	-	32.0674	60.1579	14.1375
CCA0500S0153	evm.TU.Contig232.153	Contig232	scaffold14356	1773535	1777367	+	17.9417	45.8953	22.9525
CCA0500S0154	evm.TU.Contig232.154	Contig232	scaffold14356	1778738	1780012	+	0.284777	0.277061	0.117131
CCA0500S0155	evm.TU.Contig232.155	Contig232	scaffold14356	1780048	1781901	+	0	0.268632	0.0709575
CCA0500S0156	evm.TU.Contig232.156	Contig232	scaffold14356	1783597	1787081	+	138.9	116.076	112.665
CCA0500S0157	evm.TU.Contig232.157	Contig232	scaffold14356	1792169	1792648	+	23.3819	8.19832	22.2734
CCA0500S0158	evm.TU.Contig232.158	Contig232	scaffold14356	1793189	1793602	+	54.6323	45.9542	98.4424
CCA0500S0159	evm.TU.Contig232.159	Contig232	scaffold14356	1794964	1800627	-	10.1861	7.05768	8.24674
CCA0500S0160	evm.TU.Contig232.160	Contig232	scaffold14356	1804439	1810558	+	131.669	186.003	125.658
CCA0500S0161	evm.TU.Contig232.161	Contig232	scaffold14356	1812991	1826499	+	58.063	34.8747	30.2212
CCA0500S0162	evm.TU.Contig232.162	Contig232	scaffold14356	1827294	1836166	-	0.550445	1.60528	1.62761
CCA0500S0163	evm.TU.Contig232.163	Contig232	scaffold14356	1848456	1850500	+	40.006	2.23352	15.6032
CCA0500S0164	evm.TU.Contig232.164	Contig232	scaffold14356	1850571	1850898	+	0.461958	0	0.474147
CCA0500S0165	evm.TU.Contig232.165	Contig232	scaffold14356	1853286	1860128	+	3.9922	3.09263	7.12107
CCA0500S0166	evm.TU.Contig232.166	Contig232	scaffold14356	1869822	1875989	+	20.8429	56.4237	16.8969
CCA0500S0167	evm.TU.Contig232.167	Contig232	scaffold14356	1876707	1882928	-	1.18801	1.98617	1.4296
CCA0500S0169	evm.TU.Contig232.169	Contig232	scaffold14356	1919636	1923981	-	1.9194	1.95879	8.62054
CCA0500S0170	evm.TU.Contig232.170	Contig232	scaffold14356	1927786	1932246	+	95.0178	70.635	44.9582
CCA0500S0171	evm.TU.Contig232.171	Contig232	scaffold14356	1932992	1950845	+	4.91918	2.64884	4.26935
CCA0500S0172	evm.TU.Contig232.172	Contig232	scaffold14356	1955425	1956116	+	55.6303	0.423522	0.596589
CCA0500S0173	evm.TU.Contig232.173	Contig232	scaffold14356	1959072	1959706	+	0.50141	0	0
CCA0500S0174	evm.TU.Contig232.174	Contig232	scaffold14356	1961179	1965114	-	13.6242	14.59	15.0979
CCA0500S0175	evm.TU.Contig232.175	Contig232	scaffold14356	1971030	1971449	+	0	0	0
CCA0500S0177	evm.TU.Contig232.177	Contig232	scaffold14356	1987289	1987708	+	0	0	0
CCA0500S0178	evm.TU.Contig232.178	Contig232	scaffold14356	1990407	1990829	+	0	0	0
CCA0500S0179	evm.TU.Contig232.179	Contig232	scaffold14356	1992402	1997909	-	6.56463	3.70354	9.30934
CCA0500S0180	evm.TU.Contig232.180	Contig232	scaffold14356	2004844	2008582	-	55.8099	32.0766	35.3472
CCA0500S0181	evm.TU.Contig232.181	Contig232	scaffold14356	2012658	2026411	+	22.459	36.2885	23.8962
CCA0500S0182	evm.TU.Contig232.182	Contig232	scaffold14356	2027943	2032888	-	3.18099	4.00338	3.83171
CCA0500S0183	evm.TU.Contig232.183	Contig232	scaffold14356	2034577	2037724	+	7.70848	3.20372	6.79819
CCA0500S0184	evm.TU.Contig232.184	Contig232	scaffold14356	2036679	2037371	-	0	0	0.297605
CCA0500S0185	evm.TU.Contig232.185	Contig232	scaffold14356	2038942	2046164	-	0	0.122553	0.0518532
CCA0500S0186	evm.TU.Contig232.186	Contig232	scaffold14356	2049843	2070829	+	13.9607	16.8212	14.1279
CCA0500S0187	evm.TU.Contig232.187	Contig232	scaffold14356	2073031	2083448	+	13.5765	8.02764	14.2777
CCA0500S0188	evm.TU.Contig232.188	Contig232	scaffold14356	2085307	2090075	-	44.8087	71.6991	18.6223
CCA0500S0189	evm.TU.Contig232.189	Contig232	scaffold14356	2091670	2097590	+	11.3129	46.454	20.4373
CCA0500S0190	evm.TU.Contig232.190	Contig232	scaffold14356	2097917	2102396	-	39.2505	20.6745	56.8382
CCA0500S0191	evm.TU.Contig232.191	Contig232	scaffold14356	2103978	2105469	+	0.279747	0	0.0719085
CCA0500S0192	evm.TU.Contig232.192	Contig232	scaffold14356	2106726	2107652	+	0	0	0
CCA0500S0193	evm.TU.Contig232.193	Contig232	scaffold14356	2114015	2116169	-	0.323179	0.0785463	0.0415475
CCA0500S0194	evm.TU.Contig232.194	Contig232	scaffold14356	2124969	2127702	+	0.242432	0.267088	0.0498678
CCA0500S0195	evm.TU.Contig232.195	Contig232	scaffold14356	2128791	2136881	+	0.139631	0.137442	0.159551
CCA0500S0196	evm.TU.Contig232.196	Contig232	scaffold14356	2136979	2137293	-	0	0	0
CCA0500S0197	evm.TU.Contig232.197	Contig232	scaffold14356	2137988	2150991	-	0.315726	12.5812	2.91489
CCA0500S0198	evm.TU.Contig232.198	Contig232	scaffold14356	2152312	2153832	-	0.408451	0.695094	2.59029
CCA0500S0200	evm.TU.Contig232.199_evm.TU.Contig232.200	Contig232	scaffold14356	2156399	2162155	+	9.20098	6.66058	3.50674
CCA0500S0201	evm.TU.Contig232.201	Contig232	scaffold14356	2162422	2165241	-	0.0373701	0	0
CCA0500S0202	evm.TU.Contig232.202	Contig232	scaffold14356	2176544	2179885	+	0.461799	0.24499	0.129515
CCA0500S0203	evm.TU.Contig232.203	Contig232	scaffold14356	2181677	2195048	+	22.0555	16.2035	20.9322
CCA0500S0204	evm.TU.Contig232.204	Contig232	scaffold14356	2196527	2198134	+	18.3025	29.9432	13.4486
CCA0500S0205	evm.TU.Contig232.205	Contig232	scaffold14356	2199062	2200767	+	5.03067	1.19237	2.0592
CCA0500S0206	evm.TU.Contig232.206	Contig232	scaffold14356	2201569	2225663	+	6.70991	5.77107	8.24254
CCA0500S0207	evm.TU.Contig232.207	Contig232	scaffold14356	2227136	2228221	-	1.24245	0.757026	1.2769
CCA0500S0208	evm.TU.Contig232.208	Contig232	scaffold14356	2228856	2233037	-	2.57412	1.8143	2.09542
CCA0500S0210	evm.TU.Contig232.210	Contig232	scaffold14356	2239307	2239832	+	0	0	0
CCA0500S0211	evm.TU.Contig232.211	Contig232	scaffold14356	2250395	2278144	-	6.39226	4.55851	5.97191
CCA0500S0212	evm.TU.Contig232.212	Contig232	scaffold14356	2282564	2287438	+	27.4676	25.6758	10.0788
CCA0500S0213	evm.TU.Contig232.213	Contig232	scaffold14356	2287696	2288207	-	0.999731	2.14619	1.4381
CCA0500S0214	evm.TU.Contig232.214	Contig232	scaffold14356	2290347	2292444	-	55.5211	59.7552	76.4502
CCA0500S0215	evm.TU.Contig232.215	Contig232	scaffold14356	2293200	2301241	-	7.84686	3.84536	7.75175
CCA0500S0216	evm.TU.Contig232.216	Contig232	scaffold14356	2303646	2308595	-	0.445338	3.67949	3.07152
CCA0500S0217	evm.TU.Contig232.217	Contig232	scaffold14356	2310860	2314005	-	0.597359	0.290501	0.745924
CCA0500S0218	evm.TU.Contig232.218	Contig232	scaffold14356	2319523	2322882	+	0.039756	0.057974	1.53329
CCA0500S0219	evm.TU.Contig232.219	Contig232	scaffold14356	2332644	2334793	+	0.0270859	0	0.75211
CCA0500S0220	evm.TU.Contig232.220	Contig232	scaffold14356	2353815	2368640	-	11.7741	4.94053	11.6198
CCA0500S0221	evm.TU.Contig232.221	Contig232	scaffold14356	2383250	2389624	-	0.0835412	0.0696021	13.9114
CCA0500S0222	evm.TU.Contig232.222	Contig232	scaffold14356	2401967	2405041	-	13.0772	19.1211	14.9571
CCA0500S0223	evm.TU.Contig232.223	Contig232	scaffold14356	2408818	2412997	-	9.17074	14.179	13.9236
CCA0500S0224	evm.TU.Contig232.224	Contig232	scaffold14356	2421882	2426412	-	28.859	192.023	60.9336
CCA0500S0225	evm.TU.Contig232.225	Contig232	scaffold14356	2434954	2437787	-	0.386893	1.70809	0.86215
CCA0500S0226	evm.TU.Contig232.226	Contig232	scaffold14356	2440360	2442168	+	10.9952	8.80287	9.95704
CCA0500S0227	evm.TU.Contig232.227	Contig232	scaffold14356	2445837	2450355	+	1.79812	0.319993	2.62218
CCA0500S0228	evm.TU.Contig232.228	Contig232	scaffold14356	2458345	2459269	+	4.15202	2.42604	2.45428
CCA0500S0229	evm.TU.Contig232.229	Contig232	scaffold14356	2459765	2469996	+	41.2761	78.219	67.7087
CCA0500S0230	evm.TU.Contig232.230	Contig232	scaffold14356	2470727	2473621	-	0.153314	0.67735	0.223921
CCA0500S0231	evm.TU.Contig232.231	Contig232	scaffold14356	2479457	2491260	+	18.1997	16.8766	27.7336
CCA0500S0232	evm.TU.Contig232.232	Contig232	scaffold14356	2491469	2496169	-	219.582	207.773	156.896
CCA0500S0233	evm.TU.Contig232.233	Contig232	scaffold14356	2497392	2502418	-	14.0659	14.6816	7.23298
CCA0500S0234	evm.TU.Contig232.234	Contig232	scaffold14356	2503656	2506727	-	8.57628	14.4471	17.5563
CCA0500S0235	evm.TU.Contig232.235	Contig232	scaffold14356	2507144	2513546	-	9.01789	10.1581	11.8151
CCA0500S0236	evm.TU.Contig232.236	Contig232	scaffold14356	2529799	2538386	-	0.219113	0.071082	0.600764
CCA0500S0237	evm.TU.Contig232.237	Contig232	scaffold14356	2555099	2555782	+	0.886798	1.15076	2.20347
CCA0500S0238	evm.TU.Contig232.238	Contig232	scaffold14356	2562672	2564518	+	6.29312	9.5125	9.75916
CCA0500S0239	evm.TU.Contig232.239	Contig232	scaffold14356	2565139	2566873	-	0.369918	2.15802	1.16848
CCA0500S0240	evm.TU.Contig232.240	Contig232	scaffold14356	2568795	2575772	-	71.9214	29.6328	58.1302
CCA0500S0241	evm.TU.Contig232.241	Contig232	scaffold14356	2576795	2577990	+	0.289096	0	0
CCA0500S0242	evm.TU.Contig232.242	Contig232	scaffold14356	2608811	2611849	+	4.59239	19.3514	7.79234
CCA0500S0243	evm.TU.Contig232.243	Contig232	scaffold14356	2613687	2621020	+	16.6611	23.1776	23.5949
CCA0500S0244	evm.TU.Contig232.244	Contig232	scaffold14356	2622857	2625665	-	9.01908	5.72978	13.887
CCA0500S0245	evm.TU.Contig232.245	Contig232	scaffold14356	2629148	2630491	+	5.08301	2.19275	11.0023
CCA0500S0246	evm.TU.Contig232.246	Contig232	scaffold14356	2631553	2642286	-	7.69625	4.58405	10.3363
CCA0500S0247	evm.TU.Contig232.247	Contig232	scaffold14356	2645486	2646185	-	0	0	0
CCA0500S0248	evm.TU.Contig232.248	Contig232	scaffold14356	2675233	2676405	+	73.6985	3.30809	25.5712
CCA0500S0249	evm.TU.Contig232.249	Contig232	scaffold14356	2685112	2694643	+	8.5494	5.14215	9.30846
CCA0500S0250	evm.TU.Contig232.250	Contig232	scaffold14356	2702164	2704702	+	126.236	134.35	64.6205
CCA0500S0252	evm.TU.Contig232.252	Contig232	scaffold14356	2723845	2727664	+	312.677	139.117	226.946
CCA0500S0253	evm.TU.Contig232.253	Contig232	scaffold14356	2732683	2735440	+	0.15261	0.420407	0.3139
CCA0500S0254	evm.TU.Contig232.254	Contig232	scaffold14356	2736570	2753026	+	0.0214589	0.0208623	0.0662091
CCA0500S0255	evm.TU.Contig232.255	Contig232	scaffold14356	2762489	2829029	+	0.648396	0.0859269	2.12056
CCA0500S0257	evm.TU.Contig232.257	Contig232	scaffold14356	2845807	2855964	+	10.4776	4.35504	4.38922
CCA0500S0258	evm.TU.Contig232.258	Contig232	scaffold14356	2862634	2871355	+	10.1878	4.25595	17.8944
CCA0500S0259	evm.TU.Contig232.259	Contig232	scaffold14356	2872817	2876043	-	59.4418	137.927	59.6888
CCA0500S0260	evm.TU.Contig232.260	Contig232	scaffold14356	2904526	2907023	-	232.187	386.727	167.626
CCA0500S0261	evm.TU.Contig232.261	Contig232	scaffold14356	2910002	2925695	+	20.9585	14.9496	9.86444
CCA0500S0262	evm.TU.Contig232.262	Contig232	scaffold14356	2924460	2925140	-	33.1981	22.3489	28.6339
CCA0500S0263	evm.TU.Contig232.263	Contig232	scaffold14356	2928334	2929097	+	16.5963	47.6589	23.3924
CCA0500S0264	evm.TU.Contig232.264	Contig232	scaffold14356	2940091	2941393	-	0	0	0
CCA0500S0265	evm.TU.Contig232.265	Contig232	scaffold14356	2943909	2947375	+	59.9785	12.5968	27.6283
CCA0500S0266	evm.TU.Contig232.266	Contig232	scaffold14356	2967639	2969799	+	0.200534	0.0278553	0.972245
CCA0500S0267	evm.TU.Contig232.267	Contig232	scaffold14356	2972168	2972559	-	0	0	0
CCA0500S0269	evm.TU.Contig232.269	Contig232	scaffold14356	2975034	2976182	+	2.88846	2.91171	2.06483
CCA0500S0270	evm.TU.Contig232.270	Contig232	scaffold14356	2981603	2993591	+	24.3412	24.5689	22.7055
CCA0500S0271	evm.TU.Contig232.271	Contig232	scaffold14356	2995676	2999347	+	0.520379	0.159736	1.26761
CCA0500S0273	evm.TU.Contig232.273	Contig232	scaffold14356	3013192	3017171	+	0.218463	0.949336	1.45389
CCA0500S0274	evm.TU.Contig232.274	Contig232	scaffold14356	3023667	3028020	+	25.4361	27.4704	24.9932
CCA0500S0275	evm.TU.Contig232.275	Contig232	scaffold14356	3030299	3031195	-	0	0	0
CCA0500S0276	evm.TU.Contig232.276	Contig232	scaffold14356	3039350	3044339	+	5.6807	11.3778	8.98323
CCA0500S0278	evm.TU.Contig232.278	Contig232	scaffold14356	3196310	3209898	-	36.3041	19.8713	34.4264
CCA0500S0279	evm.TU.Contig232.279	Contig232	scaffold14356	3211010	3241954	-	25.7409	21.0166	18.7243
CCA0500S0280	evm.TU.Contig232.280	Contig232	scaffold14356	3244030	3249039	+	20.7638	26.9596	15.007
CCA0500S0281	evm.TU.Contig232.281	Contig232	scaffold14356	3249914	3256684	-	107.306	79.9119	72.3712
CCA0500S0282	evm.TU.Contig232.282	Contig232	scaffold14356	3267072	3268821	-	21.6055	9.93808	24.0005
CCA0500S0283	evm.TU.Contig232.283	Contig232	scaffold14356	3285950	3288902	+	23.7363	10.3658	19.7611
CCA0500S0284	evm.TU.Contig232.284	Contig232	scaffold14356	3290601	3294484	-	37.5241	79.5306	44.8133
CCA0500S0286	evm.TU.Contig232.286	Contig232	scaffold14356	3302473	3304816	-	2.72668	3.14565	0.254064
CCA0500S0287	evm.TU.Contig232.287	Contig232	scaffold14356	3306548	3308832	-	0	0	0
CCA0500S0288	evm.TU.Contig232.288	Contig232	scaffold14356	3323192	3330542	-	19.7707	9.27883	22.7371
CCA0500S0289	evm.TU.Contig232.289	Contig232	scaffold14356	3334240	3339287	+	22.4473	32.0795	24.3388
CCA0500S0290	evm.TU.Contig232.290	Contig232	scaffold14356	3340599	3345821	+	10.148	10.0015	12.3667
CCA0500S0291	evm.TU.Contig232.291	Contig232	scaffold14356	3347989	3353659	+	6.33876	5.91725	12.0924
CCA0500S0292	evm.TU.Contig232.292	Contig232	scaffold14356	3360903	3364720	+	9.85354	14.6136	24.9114
CCA0500S0293	evm.TU.Contig232.293	Contig232	scaffold14356	3372342	3373246	+	1.16545	3.21208	8.78861
CCA0500S0294	evm.TU.Contig232.294	Contig232	scaffold14356	3385103	3390307	+	25.2884	32.5728	22.6915
CCA0500S0295	evm.TU.Contig232.295	Contig232	scaffold14356	3402079	3405109	+	13.1857	10.5521	26.2234
CCA0500S0298	evm.TU.Contig232.298	Contig232	scaffold14356	3420904	3422705	-	3.71597	0.756249	4.97694
CCA0500S0299	evm.TU.Contig232.299	Contig232	scaffold14356	3428017	3438269	-	11.0253	9.29209	8.91585
CCA0500S0300	evm.TU.Contig232.300	Contig232	scaffold14356	3441331	3442852	+	54.8628	27.8026	36.2742
CCA0500S0302	evm.TU.Contig232.302	Contig232	scaffold14356	3557063	3567041	+	11.1324	4.19054	11.0328
CCA0500S0304	evm.TU.Contig232.304	Contig232	scaffold14356	3609882	3613789	+	0	0	0
CCA0500S0305	evm.TU.Contig232.305	Contig232	scaffold14356	3658610	3660639	+	72.6049	81.7856	49.3664
CCA0500S0306	evm.TU.Contig232.306	Contig232	scaffold14356	3662330	3666529	-	11.0436	11.2091	20.2802
CCA0500S0307	evm.TU.Contig232.307	Contig232	scaffold14356	3684165	3688468	-	3.47273	2.58258	4.14311
CCA0500S0308	evm.TU.Contig232.308	Contig232	scaffold14356	3766288	3767700	-	4.72521	4.54155	5.58569
CCA0500S0309	evm.TU.Contig232.309	Contig232	scaffold14356	3767731	3768159	-	13.9302	17.0742	16.5892
CCA0500S0310	evm.TU.Contig232.310	Contig232	scaffold14356	3838591	3842375	+	24.7317	38.3978	30.8701
CCA0500S0313	evm.TU.Contig232.313	Contig232	scaffold14356	3869032	3879574	-	8.75287	7.45794	8.13695
CCA0500S0314	evm.TU.Contig232.314	Contig232	scaffold14356	3884484	3904319	-	0	0	0
CCA0500S0315	evm.TU.Contig232.315	Contig232	scaffold14356	3904366	3904695	-	0	0	0
CCA0500S0320	evm.TU.Contig232.320	Contig232	scaffold14356	3951314	3954155	-	0	0	0
CCA0500S0322	evm.TU.Contig232.322	Contig232	scaffold14356	3977975	3980232	+	1.10027	14.139	7.30598
CCA0500S0324	evm.TU.Contig232.324	Contig232	scaffold14356	4060297	4065773	-	8.45024	7.0104	16.2819
CCA0500S0329	evm.TU.Contig232.329	Contig232	scaffold14356	4089869	4096026	-	0	0	0
CCA0500S0330	evm.TU.Contig232.330	Contig232	scaffold14356	4125350	4126409	+	0	0.717742	1.57553
CCA0500S0331	evm.TU.Contig232.331	Contig232	scaffold14356	4132664	4136201	-	4.61666	80.9784	63.9362
CCA0500S0332	evm.TU.Contig232.332	Contig232	scaffold14356	4181500	4184599	+	0.896679	2.14655	8.51202
CCA0500S0335	evm.TU.Contig232.335	Contig232	scaffold14356	4213148	4215734	+	0.600358	1.1983	230.446
CCA0500S0339	evm.TU.Contig232.339	Contig232	scaffold14356	4285499	4286037	-	0	0	0
CCA0500S0341	evm.TU.Contig232.341	Contig232	scaffold14356	4292672	4293151	-	0	0	0.439607
CCA0500S0342	evm.TU.Contig232.342	Contig232	scaffold14356	4293167	4299488	-	0	0	0.0412363
CCA0500S0344	evm.TU.Contig232.344	Contig232	scaffold14356	4329461	4333337	-	1.94946	6.389	4.00944
CCA0500S0346	evm.TU.Contig232.346	Contig232	scaffold14356	4371750	4373343	+	393.579	1026.88	563.795
CCA0500S0347	evm.TU.Contig232.347	Contig232	scaffold14356	4375266	4375652	-	0	0	0
CCA0500S0348	evm.TU.Contig232.348	Contig232	scaffold14356	4382068	4384080	+	9.19799	38.7293	48.7097
CCA0500S0350	evm.TU.Contig232.350	Contig232	scaffold14356	4437913	4439252	-	0	0.394674	0.805338
CCA0500S0353	evm.TU.Contig232.353	Contig232	scaffold14356	4499128	4505928	+	0	0	0
CCA0500S0354	evm.TU.Contig232.354	Contig232	scaffold14356	4507053	4518208	+	80.5329	113.002	61.502
CCA0500S0355	evm.TU.Contig232.355	Contig232	scaffold14356	4528118	4528906	+	6.567	6.06255	4.02781
CCA0500S0356	evm.TU.Contig232.356	Contig232	scaffold14356	4553271	4564689	+	144.428	107.49	104.243
CCA0500S0357	evm.TU.Contig232.357	Contig232	scaffold14356	4622906	4625636	-	0	0	0
CCA0500S0358	evm.TU.Contig232.358	Contig232	scaffold14356	4686693	4691190	-	144.131	159.101	87.3294
CCA0500S0362	evm.TU.Contig232.362	Contig232	scaffold14356	4798825	4799691	-	0	0	0
CCA0500S0363	evm.TU.Contig232.363	Contig232	scaffold14356	4819196	4834158	+	5.51429	3.82155	6.1104
CCA0500S0365	evm.TU.Contig232.365	Contig232	scaffold14356	4905203	4928766	+	3.11787	4.29796	3.5941
CCA0501S0002	evm.TU.Contig2322.2	Contig2322	scaffold14379	6292	7468	-	3.13535	9.05069	15.469
CCA0502S0001	evm.TU.Contig233.1	Contig233	scaffold14466	49779	51755	-	0	0	0
CCA0502S0003	evm.TU.Contig233.3	Contig233	scaffold14466	225912	226554	+	0	0	0
CCA0502S0005	evm.TU.Contig233.5	Contig233	scaffold14466	271989	276840	+	1.77106	1.08293	1.82118
CCA0502S0006	evm.TU.Contig233.6	Contig233	scaffold14466	336204	341372	+	8.70917	6.98406	9.11919
CCA0502S0007	evm.TU.Contig233.7	Contig233	scaffold14466	376720	379837	+	6.56263	4.32002	6.11661
CCA0502S0008	evm.TU.Contig233.8	Contig233	scaffold14466	398509	398943	+	6.6352	5.59723	3.86985
CCA0502S0009	evm.TU.Contig233.9	Contig233	scaffold14466	399015	401023	+	7.49927	2.52394	9.53842
CCA0502S0010	evm.TU.Contig233.10	Contig233	scaffold14466	401894	403253	-	16.3676	69.9697	18.1209
CCA0502S0012	evm.TU.Contig233.12	Contig233	scaffold14466	485641	502156	+	8.65633	6.09359	7.72908
CCA0502S0013	evm.TU.Contig233.13	Contig233	scaffold14466	528584	532433	+	11.3053	9.22439	7.79231
CCA0502S0014	evm.TU.Contig233.14	Contig233	scaffold14466	544764	606398	-	4.92612	1.95927	4.86433
CCA0502S0015	evm.TU.Contig233.15	Contig233	scaffold14466	683814	684530	+	21.656	12.4548	14.8427
CCA0502S0016	evm.TU.Contig233.16	Contig233	scaffold14466	721591	722773	+	7.3961	11.3822	9.90881
CCA0502S0018	evm.TU.Contig233.18	Contig233	scaffold14466	724793	725975	+	5.49621	9.86461	8.72254
CCA0502S0026	evm.TU.Contig233.26	Contig233	scaffold14466	883756	905293	+	15.7938	14.6894	20.0389
CCA0502S0027	evm.TU.Contig233.27	Contig233	scaffold14466	954326	969728	+	28.4997	24.1309	16.8231
CCA0502S0028	evm.TU.Contig233.28	Contig233	scaffold14466	986788	1049641	-	10.9486	15.9716	13.0093
CCA0502S0032	evm.TU.Contig233.32	Contig233	scaffold14466	1091575	1099162	-	36.7379	29.0038	25.5896
CCA0502S0034	evm.TU.Contig233.34	Contig233	scaffold14466	1115350	1120473	+	0	0	0
CCA0502S0035	evm.TU.Contig233.35	Contig233	scaffold14466	1120884	1129565	+	24.7312	22.9598	29.5114
CCA0502S0036	evm.TU.Contig233.36	Contig233	scaffold14466	1129856	1143519	-	0.0317988	2.21015	1.70065
CCA0502S0037	evm.TU.Contig233.37	Contig233	scaffold14466	1152571	1159076	-	7.75195	6.29953	9.25225
CCA0502S0038	evm.TU.Contig233.38	Contig233	scaffold14466	1205500	1206082	-	0.194084	0.18898	0.29929
CCA0502S0039	evm.TU.Contig233.39	Contig233	scaffold14466	1207309	1217200	+	0.0953333	0	0.0588287
CCA0502S0040	evm.TU.Contig233.40	Contig233	scaffold14466	1236002	1237360	-	0	0	0
CCA0502S0043	evm.TU.Contig233.43	Contig233	scaffold14466	1270691	1286142	-	42.2326	24.6762	40.7038
CCA0502S0048	evm.TU.Contig233.48	Contig233	scaffold14466	1382145	1390482	+	33.3328	16.1867	32.0594
CCA0502S0052	evm.TU.Contig233.52	Contig233	scaffold14466	1458448	1459588	+	184.698	248.035	292.303
CCA0502S0053	evm.TU.Contig233.53	Contig233	scaffold14466	1459901	1460360	+	2.48125	5.27327	12.7382
CCA0502S0054	evm.TU.Contig233.54	Contig233	scaffold14466	1469903	1473744	+	9.43616	6.09286	26.595
CCA0502S0055	evm.TU.Contig233.55	Contig233	scaffold14466	1481848	1511541	+	59.9969	64.9906	45.0922
CCA0502S0057	evm.TU.Contig233.57	Contig233	scaffold14466	1550192	1571489	+	11.2389	10.7358	12.2501
CCA0502S0058	evm.TU.Contig233.58	Contig233	scaffold14466	1590436	1602884	+	7.05768	11.7169	9.14114
CCA0502S0059	evm.TU.Contig233.59	Contig233	scaffold14466	1633030	1657430	+	6.76199	3.66121	6.02432
CCA0502S0060	evm.TU.Contig233.60	Contig233	scaffold14466	1665552	1676016	+	11.1081	14.8571	13.2658
CCA0502S0061	evm.TU.Contig233.61	Contig233	scaffold14466	1679919	1692970	-	5.35044	2.57846	1.63785
CCA0502S0062	evm.TU.Contig233.62	Contig233	scaffold14466	1705637	1707727	-	0	0	0.0351702
CCA0502S0063	evm.TU.Contig233.63	Contig233	scaffold14466	1707948	1727175	-	0.0763818	0	0
CCA0502S0064	evm.TU.Contig233.64	Contig233	scaffold14466	1735141	1739368	-	0	0	0
CCA0502S0067	evm.TU.Contig233.67	Contig233	scaffold14466	1863273	1863584	-	7.77741	15.3197	23.8566
CCA0502S0068	evm.TU.Contig233.68	Contig233	scaffold14466	1863607	1877190	-	5.38316	7.35522	13.7243
CCA0502S0071	evm.TU.Contig233.71	Contig233	scaffold14466	1961415	1965587	-	2.31229	0.899503	2.59397
CCA0502S0072	evm.TU.Contig233.72	Contig233	scaffold14466	1965590	1970335	-	4.00812	2.27518	4.94568
CCA0502S0073	evm.TU.Contig233.73	Contig233	scaffold14466	1984328	1984576	+	0	0	0
CCA0502S0075	evm.TU.Contig233.75	Contig233	scaffold14466	2026246	2033938	+	3.37144	3.9238	4.9436
CCA0502S0076	evm.TU.Contig233.76	Contig233	scaffold14466	2035286	2035492	+	0	0	0
CCA0502S0079	evm.TU.Contig233.79	Contig233	scaffold14466	2055707	2057466	-	98.4395	150.209	118.664
CCA0502S0083	evm.TU.Contig233.83	Contig233	scaffold14466	2120641	2124569	+	0.257489	0.97637	0.503141
CCA0502S0085	evm.TU.Contig233.85	Contig233	scaffold14466	2168246	2170488	+	5.39515	3.37428	9.06481
CCA0502S0087	evm.TU.Contig233.87	Contig233	scaffold14466	2175073	2181128	+	3.4431	2.74453	3.19641
CCA0502S0088	evm.TU.Contig233.88	Contig233	scaffold14466	2181762	2182868	-	50.8006	182.837	65.1696
CCA0502S0095	evm.TU.Contig233.95	Contig233	scaffold14466	2384179	2390012	+	3.62579	6.02474	4.96749
CCA0502S0096	evm.TU.Contig233.96	Contig233	scaffold14466	2393783	2395951	-	40.396	63.897	47.8321
CCA0502S0098	evm.TU.Contig233.98	Contig233	scaffold14466	2420457	2422946	-	199.92	462.781	209.539
CCA0502S0100	evm.TU.Contig233.100	Contig233	scaffold14466	2452137	2452496	-	0	0	0
CCA0502S0101	evm.TU.Contig233.101	Contig233	scaffold14466	2452620	2462718	-	0	0	0
CCA0502S0108	evm.TU.Contig233.108	Contig233	scaffold14466	2631993	2639079	-	0.499408	0.0992907	0.140086
CCA0502S0111	evm.TU.Contig233.111	Contig233	scaffold14466	2669981	2672887	+	0.103421	0.251386	1.62202
CCA0502S0112	evm.TU.Contig233.112	Contig233	scaffold14466	2693341	2701188	+	9.42107	18.0457	8.79998
CCA0502S0113	evm.TU.Contig233.113	Contig233	scaffold14466	2729397	2756251	-	24.6384	30.4161	29.4231
CCA0502S0118	evm.TU.Contig233.118	Contig233	scaffold14466	2779171	2791344	+	4.17793	1.83377	0.570329
CCA0502S0121	evm.TU.Contig233.121	Contig233	scaffold14466	2855580	2858081	+	7.5579	6.11957	7.46049
CCA0502S0122	evm.TU.Contig233.122	Contig233	scaffold14466	2860039	2864586	+	1.56298	0.952556	1.89388
CCA0502S0127	evm.TU.Contig233.127	Contig233	scaffold14466	2939877	2944325	-	13.723	15.4017	18.163
CCA0502S0128	evm.TU.Contig233.128	Contig233	scaffold14466	2958069	2962011	-	0	0.0467468	0
CCA0502S0129	evm.TU.Contig233.129	Contig233	scaffold14466	2964332	2964631	+	0	0	0
CCA0502S0131	evm.TU.Contig233.131	Contig233	scaffold14466	2973755	2979507	+	0	0	0
CCA0502S0133	evm.TU.Contig233.133	Contig233	scaffold14466	3014747	3017534	+	3.12181	17.0361	14.0834
CCA0502S0134	evm.TU.Contig233.134	Contig233	scaffold14466	3054217	3059553	+	18.6195	11.2711	22.3423
CCA0502S0136	evm.TU.Contig233.136	Contig233	scaffold14466	3087514	3138949	-	23.9943	14.4917	14.3848
CCA0502S0137	evm.TU.Contig233.137	Contig233	scaffold14466	3142997	3143769	-	0.555444	0.941279	0.450458
CCA0502S0140	evm.TU.Contig233.140	Contig233	scaffold14466	3161504	3167504	+	2.74938	1.24252	1.92724
CCA0502S0141	evm.TU.Contig233.141	Contig233	scaffold14466	3169105	3172810	-	6.13928	10.9003	10.1519
CCA0502S0142	evm.TU.Contig233.142	Contig233	scaffold14466	3173914	3174970	+	0	0.845105	0.405766
CCA0502S0143	evm.TU.Contig233.143	Contig233	scaffold14466	3177163	3177564	-	0	0	0
CCA0502S0144	evm.TU.Contig233.144	Contig233	scaffold14466	3181622	3184686	-	15.9579	7.22355	31.6078
CCA0502S0145	evm.TU.Contig233.145	Contig233	scaffold14466	3194385	3198468	+	17.7676	20.8972	11.1397
CCA0502S0146	evm.TU.Contig233.146	Contig233	scaffold14466	3198490	3200488	+	8.09179	17.552	9.05257
CCA0502S0147	evm.TU.Contig233.147	Contig233	scaffold14466	3204396	3206690	-	12.4148	31.0839	21.9156
CCA0502S0148	evm.TU.Contig233.148	Contig233	scaffold14466	3216952	3219040	+	65.3132	53.3293	84.6633
CCA0502S0149	evm.TU.Contig233.149	Contig233	scaffold14466	3219619	3224928	+	23.8178	86.6929	46.9113
CCA0502S0150	evm.TU.Contig233.150	Contig233	scaffold14466	3226056	3228953	-	0.0516028	0	0.0530629
CCA0502S0151	evm.TU.Contig233.151	Contig233	scaffold14466	3235278	3245971	-	37.1915	25.2875	35.3107
CCA0502S0152	evm.TU.Contig233.152	Contig233	scaffold14466	3251847	3256685	+	9.39208	16.1267	11.8802
CCA0502S0153	evm.TU.Contig233.153	Contig233	scaffold14466	3264275	3265040	+	0	0	0
CCA0502S0154	evm.TU.Contig233.154	Contig233	scaffold14466	3271139	3323191	-	21.1217	19.9508	15.3447
CCA0502S0155	evm.TU.Contig233.155	Contig233	scaffold14466	3341964	3342942	-	0.548253	0	0.657587
CCA0502S0156	evm.TU.Contig233.156	Contig233	scaffold14466	3343237	3343575	+	0.79572	0	2.45117
CCA0502S0157	evm.TU.Contig233.157	Contig233	scaffold14466	3347621	3348768	-	6.23134	6.8424	4.29959
CCA0502S0158	evm.TU.Contig233.158	Contig233	scaffold14466	3364399	3367771	-	25.4423	46.2222	19.221
CCA0502S0159	evm.TU.Contig233.159	Contig233	scaffold14466	3370750	3372173	-	4.76124	2.35392	1.49388
CCA0502S0160	evm.TU.Contig233.160	Contig233	scaffold14466	3375052	3379571	-	14.423	7.3801	7.69893
CCA0502S0161	evm.TU.Contig233.161	Contig233	scaffold14466	3390996	3395312	-	1.4104	0.687789	1.45268
CCA0502S0162	evm.TU.Contig233.162	Contig233	scaffold14466	3395627	3396081	-	39.8634	33.2712	16.9158
CCA0502S0163	evm.TU.Contig233.163	Contig233	scaffold14466	3396787	3403415	-	27.7051	16.5194	20.7159
CCA0502S0165	evm.TU.Contig233.165	Contig233	scaffold14466	3416909	3423126	-	113.238	64.4958	79.4874
CCA0502S0166	evm.TU.Contig233.166	Contig233	scaffold14466	3426878	3429668	-	1.94525	1.22603	2.35249
CCA0502S0167	evm.TU.Contig233.167	Contig233	scaffold14466	3434037	3436229	-	22.7423	17.5202	18.9856
CCA0502S0168	evm.TU.Contig233.168	Contig233	scaffold14466	3437923	3441766	-	49.746	21.2519	35.4751
CCA0502S0169	evm.TU.Contig233.169	Contig233	scaffold14466	3450668	3452522	-	0.117772	0.0572465	33.047
CCA0502S0170	evm.TU.Contig233.170	Contig233	scaffold14466	3459598	3463545	-	0.326294	0.211624	1.00657
CCA0502S0171	evm.TU.Contig233.171	Contig233	scaffold14466	3490992	3492620	-	0	0	0.399855
CCA0502S0174	evm.TU.Contig233.174	Contig233	scaffold14466	3502711	3504336	-	0	0	0.0235726
CCA0502S0176	evm.TU.Contig233.176	Contig233	scaffold14466	3519747	3530782	+	11.9773	10.3908	12.688
CCA0502S0177	evm.TU.Contig233.177	Contig233	scaffold14466	3530808	3532973	+	78.2532	92.0451	71.0336
CCA0502S0178	evm.TU.Contig233.178	Contig233	scaffold14466	3544804	3551655	-	0.0108996	0.127131	0
CCA0502S0179	evm.TU.Contig233.179	Contig233	scaffold14466	3555592	3560612	+	0	0	0
CCA0502S0180	evm.TU.Contig233.180	Contig233	scaffold14466	3561659	3565567	+	0	0	0
CCA0502S0181	evm.TU.Contig233.181	Contig233	scaffold14466	3572477	3574979	+	0.590118	2.21382	1.34373
CCA0502S0182	evm.TU.Contig233.182	Contig233	scaffold14466	3603501	3606799	+	13.0945	13.0219	13.0453
CCA0502S0183	evm.TU.Contig233.183	Contig233	scaffold14466	3608771	3609352	+	0	0	0
CCA0502S0184	evm.TU.Contig233.184	Contig233	scaffold14466	3610001	3614891	-	61.7808	56.9536	29.7401
CCA0502S0185	evm.TU.Contig233.185	Contig233	scaffold14466	3622381	3623455	+	0	0.448439	0.0790308
CCA0502S0186	evm.TU.Contig233.186	Contig233	scaffold14466	3626904	3628557	-	0.817724	1.07719	0.325539
CCA0502S0187	evm.TU.Contig233.187	Contig233	scaffold14466	3640936	3651536	-	6.13365	3.91358	5.88476
CCA0502S0189	evm.TU.Contig233.189	Contig233	scaffold14466	3709600	3711712	+	0.936214	1.37587	6.29217
CCA0502S0190	evm.TU.Contig233.190	Contig233	scaffold14466	3729023	3748445	+	7.1869	13.4304	10.0957
CCA0502S0191	evm.TU.Contig233.191	Contig233	scaffold14466	3749120	3751708	-	136.024	74.7815	163.979
CCA0502S0192	evm.TU.Contig233.192	Contig233	scaffold14466	3754952	3758567	+	42.9804	20.544	28.0543
CCA0502S0193	evm.TU.Contig233.193	Contig233	scaffold14466	3774589	3777990	+	85.8126	94.9993	39.6879
CCA0502S0196	evm.TU.Contig233.195_evm.TU.Contig233.196	Contig233	scaffold14466	3855720	3857976	-	0.063982	0.103671	0
CCA0502S0199	evm.TU.Contig233.199	Contig233	scaffold14466	4005553	4007245	+	0	0	0
CCA0502S0200	evm.TU.Contig233.200	Contig233	scaffold14466	4015764	4018458	-	3.97571	2.37578	6.4078
CCA0503S0001	evm.TU.Contig23309.1	Contig23309	scaffold14477	125	2055	-	0	0	0
CCA0504S0001	evm.TU.Contig2334.1	Contig2334	scaffold14510	5275	7578	-	0.23175	0.31544	0.476687
CCA0505S0004	evm.TU.Contig234.4	Contig234	scaffold14575	116620	125949	+	0.413541	0	0
CCA0505S0005	evm.TU.Contig234.5	Contig234	scaffold14575	125983	126795	+	0	0	0
CCA0505S0016	evm.TU.Contig234.16	Contig234	scaffold14575	287475	289659	+	0.0366696	0.463595	0.641073
CCA0505S0017	evm.TU.Contig234.17	Contig234	scaffold14575	305838	306688	+	0.053001	0.0515607	0
CCA0505S0019	evm.TU.Contig234.19	Contig234	scaffold14575	322014	327097	+	260.44	206.62	303.686
CCA0505S0021	evm.TU.Contig234.21	Contig234	scaffold14575	348236	349866	+	9.93401	12.7886	2.39563
CCA0505S0022	evm.TU.Contig234.22	Contig234	scaffold14575	394139	404696	+	0.634835	2.14048	1.65384
CCA0505S0023	evm.TU.Contig234.23	Contig234	scaffold14575	405485	415997	+	5.90447	4.09543	8.4929
CCA0505S0024	evm.TU.Contig234.24	Contig234	scaffold14575	439316	462732	+	9.55102	4.65526	9.97735
CCA0505S0025	evm.TU.Contig234.25	Contig234	scaffold14575	483717	486360	+	0.299501	2.41905	15.1168
CCA0505S0027	evm.TU.Contig234.27	Contig234	scaffold14575	523778	524395	+	0	0	0
CCA0505S0028	evm.TU.Contig234.28	Contig234	scaffold14575	548140	548768	-	0	0	0
CCA0505S0029	evm.TU.Contig234.29	Contig234	scaffold14575	549306	556370	-	9.62317	10.6071	7.71442
CCA0505S0031	evm.TU.Contig234.31	Contig234	scaffold14575	584507	590784	+	43.4222	50.251	49.2473
CCA0505S0032	evm.TU.Contig234.32	Contig234	scaffold14575	590979	594131	-	2.32639	2.06139	1.79178
CCA0505S0033	evm.TU.Contig234.33	Contig234	scaffold14575	594659	597938	+	70.4453	118.782	121.869
CCA0505S0036	evm.TU.Contig234.36	Contig234	scaffold14575	625972	633512	+	10.0335	14.7211	12.8639
CCA0505S0037	evm.TU.Contig234.37	Contig234	scaffold14575	659466	679299	+	4.87135	2.70067	5.33247
CCA0505S0038	evm.TU.Contig234.38	Contig234	scaffold14575	679514	683030	+	0.947781	0.400783	1.31366
CCA0505S0039	evm.TU.Contig234.39	Contig234	scaffold14575	695755	696779	+	1.88984	11.8119	5.71201
CCA0505S0040	evm.TU.Contig234.40	Contig234	scaffold14575	700823	710142	-	4.70626	5.86816	8.06734
CCA0505S0041	evm.TU.Contig234.41	Contig234	scaffold14575	719942	730526	-	7.99235	6.13391	8.75515
CCA0505S0042	evm.TU.Contig234.42	Contig234	scaffold14575	731671	733872	-	31.192	1.84485	3.64108
CCA0505S0043	evm.TU.Contig234.43	Contig234	scaffold14575	739332	744492	+	6.94994	4.47739	4.54799
CCA0505S0044	evm.TU.Contig234.44	Contig234	scaffold14575	745383	746183	-	3.34892	3.33777	3.03326
CCA0505S0045	evm.TU.Contig234.45	Contig234	scaffold14575	749331	753062	+	15.1089	11.9327	18.2972
CCA0505S0046	evm.TU.Contig234.46	Contig234	scaffold14575	757105	760677	+	0.0696953	0	0.21505
CCA0505S0047	evm.TU.Contig234.47	Contig234	scaffold14575	761221	762548	+	7.32746	6.35999	7.89637
CCA0505S0048	evm.TU.Contig234.48	Contig234	scaffold14575	764325	768497	+	4.67807	7.11404	4.1712
CCA0505S0049	evm.TU.Contig234.49	Contig234	scaffold14575	783281	789025	-	3.13301	7.88272	4.1936
CCA0505S0050	evm.TU.Contig234.50	Contig234	scaffold14575	789908	792635	-	0	0	0
CCA0505S0051	evm.TU.Contig234.51	Contig234	scaffold14575	796012	798496	-	105.677	290.355	103.05
CCA0505S0052	evm.TU.Contig234.52	Contig234	scaffold14575	832112	832795	-	0.0738998	0.143845	0
CCA0505S0053	evm.TU.Contig234.53	Contig234	scaffold14575	837864	841055	+	0	0	0
CCA0505S0054	evm.TU.Contig234.54	Contig234	scaffold14575	859016	861922	+	14.888	11.8652	16.545
CCA0505S0055	evm.TU.Contig234.55	Contig234	scaffold14575	874334	877508	+	0.22014	0	0.150895
CCA0505S0056	evm.TU.Contig234.56	Contig234	scaffold14575	888245	899961	+	2.79626	1.0196	4.23648
CCA0505S0057	evm.TU.Contig234.57	Contig234	scaffold14575	908264	909475	+	0	0.143267	0
CCA0505S0058	evm.TU.Contig234.58	Contig234	scaffold14575	912224	915578	-	4.41661	7.10413	6.13566
CCA0505S0060	evm.TU.Contig234.60	Contig234	scaffold14575	1018493	1020664	+	1.14838	2.04975	14.5795
CCA0505S0062	evm.TU.Contig234.62	Contig234	scaffold14575	1080889	1081679	+	0.274232	0.266865	0.352457
CCA0505S0063	evm.TU.Contig234.63	Contig234	scaffold14575	1081855	1082388	+	0.343279	0	0
CCA0505S0064	evm.TU.Contig234.64	Contig234	scaffold14575	1082434	1098400	+	0.491176	0.26681	0.222871
CCA0505S0065	evm.TU.Contig234.65	Contig234	scaffold14575	1141453	1144184	+	0	0.0101594	0.064485
CCA0505S0066	evm.TU.Contig234.66	Contig234	scaffold14575	1183081	1184364	+	0	0	0
CCA0505S0067	evm.TU.Contig234.67	Contig234	scaffold14575	1184482	1184700	+	0	0	0
CCA0505S0068	evm.TU.Contig234.68	Contig234	scaffold14575	1184743	1190214	+	0	0	0
CCA0505S0072	evm.TU.Contig234.72	Contig234	scaffold14575	1274844	1279024	+	0.810918	0.205149	0.285632
CCA0505S0073	evm.TU.Contig234.73	Contig234	scaffold14575	1279334	1281687	+	0.716194	0.222843	0.29462
CCA0505S0075	evm.TU.Contig234.75	Contig234	scaffold14575	1367136	1392783	+	8.87982	6.25874	5.82966
CCA0505S0076	evm.TU.Contig234.76	Contig234	scaffold14575	1396411	1400921	+	72.9525	50.5563	44.8855
CCA0505S0077	evm.TU.Contig234.77	Contig234	scaffold14575	1401552	1405803	-	8.85227	24.924	10.7807
CCA0505S0078	evm.TU.Contig234.78	Contig234	scaffold14575	1417496	1423891	+	16.5439	19.1973	14.339
CCA0505S0079	evm.TU.Contig234.79	Contig234	scaffold14575	1426305	1428053	+	0	0	0
CCA0505S0080	evm.TU.Contig234.80	Contig234	scaffold14575	1430371	1445875	-	77.1465	43.2148	56.4896
CCA0505S0081	evm.TU.Contig234.81	Contig234	scaffold14575	1447734	1448051	+	31.8463	14.3382	19.9107
CCA0505S0082	evm.TU.Contig234.82	Contig234	scaffold14575	1448879	1449682	-	0.800725	0.650214	1.3717
CCA0505S0083	evm.TU.Contig234.83	Contig234	scaffold14575	1456052	1457553	+	1.55838	0.902105	2.32759
CCA0505S0084	evm.TU.Contig234.84	Contig234	scaffold14575	1460038	1465073	+	6.63648	6.73528	6.69245
CCA0505S0085	evm.TU.Contig234.85	Contig234	scaffold14575	1466123	1471699	-	4.99283	1.33539	4.48465
CCA0505S0086	evm.TU.Contig234.86	Contig234	scaffold14575	1474440	1475407	-	28.8604	16.3306	45.2255
CCA0505S0087	evm.TU.Contig234.87	Contig234	scaffold14575	1479899	1486065	+	0.115888	0.0321869	0.408649
CCA0505S0088	evm.TU.Contig234.88	Contig234	scaffold14575	1487432	1489163	+	11.7624	23.5248	13.1427
CCA0505S0089	evm.TU.Contig234.89	Contig234	scaffold14575	1498938	1499773	+	14.8942	9.78588	14.8427
CCA0505S0090	evm.TU.Contig234.90	Contig234	scaffold14575	1502854	1506789	-	33.7712	20.7685	31.4688
CCA0505S0091	evm.TU.Contig234.91	Contig234	scaffold14575	1507811	1511371	-	1.51555	3.09671	7.44929
CCA0505S0092	evm.TU.Contig234.92	Contig234	scaffold14575	1511416	1519160	-	14.752	10.676	13.6237
CCA0505S0093	evm.TU.Contig234.93	Contig234	scaffold14575	1520102	1524126	-	0.0808379	0.60289	2.43866
CCA0505S0094	evm.TU.Contig234.94	Contig234	scaffold14575	1539979	1544016	-	0.252288	0.790674	2.99819
CCA0505S0095	evm.TU.Contig234.95	Contig234	scaffold14575	1546906	1550496	-	0.40502	1.73249	2.99916
CCA0505S0096	evm.TU.Contig234.96	Contig234	scaffold14575	1553539	1554527	-	7.99081	8.73311	5.2573
CCA0505S0097	evm.TU.Contig234.97	Contig234	scaffold14575	1556652	1557328	-	2.37007	1.25905	3.10088
CCA0505S0098	evm.TU.Contig234.98	Contig234	scaffold14575	1562153	1563897	+	0.660237	0.444414	0.391739
CCA0505S0099	evm.TU.Contig234.99	Contig234	scaffold14575	1564720	1566514	+	31.9404	14.3956	18.61
CCA0505S0100	evm.TU.Contig234.100	Contig234	scaffold14575	1568136	1571101	-	22.9511	624.594	147.18
CCA0505S0101	evm.TU.Contig234.101	Contig234	scaffold14575	1572575	1576812	-	34.2907	55.9821	16.5081
CCA0505S0103	evm.TU.Contig234.103	Contig234	scaffold14575	1583325	1589363	+	3.16246	1.39606	0.537122
CCA0505S0104	evm.TU.Contig234.104	Contig234	scaffold14575	1589365	1636054	-	21.5036	9.88089	24.7685
CCA0505S0105	evm.TU.Contig234.105	Contig234	scaffold14575	1648494	1652382	-	0.146571	34.2828	8.61437
CCA0505S0106	evm.TU.Contig234.106	Contig234	scaffold14575	1658713	1668883	+	2.53166	5.51715	3.02921
CCA0505S0107	evm.TU.Contig234.107	Contig234	scaffold14575	1670151	1670925	+	0	0	0
CCA0505S0109	evm.TU.Contig234.109	Contig234	scaffold14575	1675663	1676649	+	32.4389	12.4444	8.81581
CCA0505S0110	evm.TU.Contig234.110	Contig234	scaffold14575	1676745	1677440	+	30.7576	10.4207	8.49724
CCA0505S0111	evm.TU.Contig234.111	Contig234	scaffold14575	1678803	1682312	-	23.028	15.3792	12.442
CCA0505S0112	evm.TU.Contig234.112	Contig234	scaffold14575	1681896	1682231	+	0.413541	0.811273	0.849212
CCA0505S0113	evm.TU.Contig234.113	Contig234	scaffold14575	1684203	1686016	+	0.0541249	1.78928	3.22855
CCA0505S0114	evm.TU.Contig234.114	Contig234	scaffold14575	1698802	1699344	-	0	0	0
CCA0505S0115	evm.TU.Contig234.115	Contig234	scaffold14575	1699764	1700821	+	0	0	0
CCA0505S0116	evm.TU.Contig234.116	Contig234	scaffold14575	1725738	1728848	+	57.065	21.857	31.8903
CCA0505S0117	evm.TU.Contig234.117	Contig234	scaffold14575	1729577	1732889	-	15.7449	7.67153	15.4187
CCA0505S0118	evm.TU.Contig234.118	Contig234	scaffold14575	1735033	1742401	-	23.1016	25.4188	27.695
CCA0505S0119	evm.TU.Contig234.119	Contig234	scaffold14575	1742912	1746312	-	18.7025	1.50554	15.0378
CCA0505S0120	evm.TU.Contig234.120	Contig234	scaffold14575	1752122	1752632	-	0	0	0
CCA0505S0121	evm.TU.Contig234.121	Contig234	scaffold14575	1755580	1771887	-	134.814	195.173	158.319
CCA0505S0122	evm.TU.Contig234.122	Contig234	scaffold14575	1772436	1773507	+	11.0564	13.3843	14.9941
CCA0505S0123	evm.TU.Contig234.123	Contig234	scaffold14575	1773760	1777814	+	4.89644	5.20199	6.86944
CCA0505S0124	evm.TU.Contig234.124	Contig234	scaffold14575	1778591	1782244	-	8.83486	21.9555	14.5362
CCA0505S0125	evm.TU.Contig234.125	Contig234	scaffold14575	1784979	1786417	+	0	0	0
CCA0505S0126	evm.TU.Contig234.126	Contig234	scaffold14575	1789506	1796595	+	2.15212	3.37016	4.03201
CCA0505S0127	evm.TU.Contig234.127	Contig234	scaffold14575	1796741	1798973	+	5.3631	2.9306	4.01454
CCA0505S0128	evm.TU.Contig234.128	Contig234	scaffold14575	1799197	1809515	-	18.5376	27.3851	14.6881
CCA0505S0129	evm.TU.Contig234.129	Contig234	scaffold14575	1811077	1815442	-	62.2666	62.4876	31.9289
CCA0505S0130	evm.TU.Contig234.130	Contig234	scaffold14575	1816252	1820215	-	4.17982	5.18786	9.11931
CCA0505S0131	evm.TU.Contig234.131	Contig234	scaffold14575	1823390	1828158	+	0.117686	0.0381315	0.013449
CCA0505S0134	evm.TU.Contig234.134	Contig234	scaffold14575	1842847	1847919	-	1.23573	0.36985	0.24437
CCA0505S0138	evm.TU.Contig234.138	Contig234	scaffold14575	1917200	1919711	+	2.808	2.74301	5.82746
CCA0505S0139	evm.TU.Contig234.139	Contig234	scaffold14575	1928324	1930129	+	1.25556	1.12218	1.93696
CCA0505S0142	evm.TU.Contig234.142	Contig234	scaffold14575	2129056	2131298	-	7.8679	8.20526	9.81534
CCA0505S0143	evm.TU.Contig234.143	Contig234	scaffold14575	2131366	2132703	-	10.1953	12.9354	10.3059
CCA0505S0145	evm.TU.Contig234.145	Contig234	scaffold14575	2144069	2149441	-	43.285	6.58058	24.154
CCA0505S0146	evm.TU.Contig234.146	Contig234	scaffold14575	2150173	2157082	+	29.0783	15.5551	24.4307
CCA0505S0148	evm.TU.Contig234.148	Contig234	scaffold14575	2170387	2176921	-	6.51144	4.40895	6.99755
CCA0505S0149	evm.TU.Contig234.149	Contig234	scaffold14575	2248520	2249079	-	0	0.405636	0
CCA0505S0151	evm.TU.Contig234.151	Contig234	scaffold14575	2265791	2271030	+	0	0	0
CCA0505S0154	evm.TU.Contig234.154	Contig234	scaffold14575	2304380	2310605	+	0	0	0
CCA0505S0156	evm.TU.Contig234.156	Contig234	scaffold14575	2369604	2369763	-	0	0	0
CCA0505S0160	evm.TU.Contig234.160	Contig234	scaffold14575	2398275	2408371	-	0.0949143	0.907268	2.65197
CCA0505S0162	evm.TU.Contig234.162	Contig234	scaffold14575	2440634	2442179	-	0	0.145915	0
CCA0505S0163	evm.TU.Contig234.163	Contig234	scaffold14575	2462520	2462895	+	0	0	0
CCA0505S0164	evm.TU.Contig234.164	Contig234	scaffold14575	2507102	2508506	+	3.01043	2.4278	3.20912
CCA0505S0165	evm.TU.Contig234.165	Contig234	scaffold14575	2515132	2516249	-	0	0	0
CCA0505S0166	evm.TU.Contig234.166	Contig234	scaffold14575	2526404	2527206	+	0.923044	0.617407	1.18641
CCA0505S0167	evm.TU.Contig234.167	Contig234	scaffold14575	2534162	2535524	+	1.90862	1.55316	9.57344
CCA0505S0168	evm.TU.Contig234.168	Contig234	scaffold14575	2537364	2540742	-	7.3617	4.50924	7.23072
CCA0505S0169	evm.TU.Contig234.169	Contig234	scaffold14575	2553622	2558939	-	3.82439	5.02533	4.47753
CCA0505S0171	evm.TU.Contig234.171	Contig234	scaffold14575	2561463	2567698	-	7.72528	14.4236	8.45838
CCA0505S0174	evm.TU.Contig234.174	Contig234	scaffold14575	2581853	2594943	-	8.27453	9.8927	8.11899
CCA0505S0175	evm.TU.Contig234.175	Contig234	scaffold14575	2618352	2642670	-	11.8901	11.526	7.25597
CCA0505S0176	evm.TU.Contig234.176	Contig234	scaffold14575	2668860	2676422	-	0	0	0
CCA0505S0177	evm.TU.Contig234.177	Contig234	scaffold14575	2677798	2681738	+	4.39669	4.27654	12.6778
CCA0505S0178	evm.TU.Contig234.178	Contig234	scaffold14575	2682348	2683055	+	3.4269	2.04179	6.97512
CCA0505S0180	evm.TU.Contig234.180	Contig234	scaffold14575	2721618	2722982	+	0	0	0
CCA0505S0183	evm.TU.Contig234.183	Contig234	scaffold14575	2762662	2787059	+	0.415187	0.569884	9.1679
CCA0505S0184	evm.TU.Contig234.184	Contig234	scaffold14575	2791295	2793930	+	0	0	0
CCA0505S0185	evm.TU.Contig234.185	Contig234	scaffold14575	2804244	2804837	-	0	0	0
CCA0505S0186	evm.TU.Contig234.186	Contig234	scaffold14575	2837310	2844807	-	12.2105	21.2614	7.38687
CCA0505S0187	evm.TU.Contig234.187	Contig234	scaffold14575	2854033	2865492	-	5.82444	8.06278	6.34209
CCA0505S0188	evm.TU.Contig234.188	Contig234	scaffold14575	2905349	2908463	+	8.72149	3.5363	12.5768
CCA0505S0189	evm.TU.Contig234.189	Contig234	scaffold14575	2945838	2949552	-	2.5395	2.71378	3.05043
CCA0505S0190	evm.TU.Contig234.190	Contig234	scaffold14575	2952330	2952710	-	0	0	0
CCA0505S0191	evm.TU.Contig234.191	Contig234	scaffold14575	2973256	2982041	-	4.47432	6.04872	5.82087
CCA0505S0192	evm.TU.Contig234.192	Contig234	scaffold14575	3053830	3056528	-	4.46657	4.79074	4.36949
CCA0505S0199	evm.TU.Contig234.199	Contig234	scaffold14575	3134631	3147581	-	5.66152	5.76502	4.95114
CCA0505S0201	evm.TU.Contig234.201	Contig234	scaffold14575	3202004	3205293	+	23.7989	24.5042	38.1874
CCA0505S0202	evm.TU.Contig234.202	Contig234	scaffold14575	3217277	3221574	-	55.2261	48.3734	57.9614
CCA0505S0203	evm.TU.Contig234.203	Contig234	scaffold14575	3282909	3294261	-	8.66547	7.2221	8.48027
CCA0505S0204	evm.TU.Contig234.204	Contig234	scaffold14575	3294389	3296871	-	2.12644	1.58789	1.3325
CCA0505S0205	evm.TU.Contig234.205	Contig234	scaffold14575	3297931	3298577	+	0	0	0
CCA0505S0207	evm.TU.Contig234.207	Contig234	scaffold14575	3313493	3317377	-	5.6348	3.17377	4.67036
CCA0505S0208	evm.TU.Contig234.208	Contig234	scaffold14575	3319090	3325370	-	18.7268	10.0221	19.3292
CCA0505S0209	evm.TU.Contig234.209	Contig234	scaffold14575	3326349	3330879	+	1.7979	1.47776	3.63033
CCA0505S0210	evm.TU.Contig234.210	Contig234	scaffold14575	3330383	3330876	-	3.22049	0	0
CCA0505S0211	evm.TU.Contig234.211	Contig234	scaffold14575	3344348	3346067	-	130.746	59.2082	20.7313
CCA0505S0212	evm.TU.Contig234.212	Contig234	scaffold14575	3349404	3360654	+	14.6203	17.0018	14.74
CCA0505S0213	evm.TU.Contig234.213	Contig234	scaffold14575	3363764	3365871	-	3.59143	8.01999	5.50576
CCA0505S0214	evm.TU.Contig234.214	Contig234	scaffold14575	3366639	3373478	+	0.57576	0.122437	0.795822
CCA0505S0215	evm.TU.Contig234.215	Contig234	scaffold14575	3374318	3376971	+	0.0476919	0.023184	0
CCA0505S0216	evm.TU.Contig234.216	Contig234	scaffold14575	3377748	3381874	-	49.8383	21.9091	56.194
CCA0505S0218	evm.TU.Contig234.218	Contig234	scaffold14575	3389370	3393983	+	31.2919	6.86388	10.7919
CCA0505S0219	evm.TU.Contig234.219	Contig234	scaffold14575	3398735	3400691	+	12.6557	15.6747	6.86855
CCA0505S0222	evm.TU.Contig234.222	Contig234	scaffold14575	3415592	3415879	-	0	0	0
CCA0505S0223	evm.TU.Contig234.223	Contig234	scaffold14575	3418772	3426073	-	28.4903	10.1158	25.44
CCA0505S0224	evm.TU.Contig234.224	Contig234	scaffold14575	3436704	3438966	+	24.9392	8.28107	6.55171
CCA0505S0225	evm.TU.Contig234.225	Contig234	scaffold14575	3440761	3445546	-	7.95214	7.91543	17.0692
CCA0505S0226	evm.TU.Contig234.226	Contig234	scaffold14575	3456966	3461769	+	8.45977	8.13414	18.1906
CCA0505S0227	evm.TU.Contig234.227	Contig234	scaffold14575	3463564	3465826	-	23.901	7.84522	7.401
CCA0505S0228	evm.TU.Contig234.228	Contig234	scaffold14575	3468180	3469471	-	6.18974	18.3217	13.1057
CCA0505S0229	evm.TU.Contig234.229	Contig234	scaffold14575	3471636	3476507	+	14.3733	15.2894	19.849
CCA0505S0230	evm.TU.Contig234.230	Contig234	scaffold14575	3477773	3479486	+	0.41786	8.7489	11.1445
CCA0505S0231	evm.TU.Contig234.231	Contig234	scaffold14575	3480651	3484893	-	9.12766	11.0057	12.7063
CCA0505S0232	evm.TU.Contig234.232	Contig234	scaffold14575	3486378	3489404	-	0	0	0
CCA0505S0233	evm.TU.Contig234.233	Contig234	scaffold14575	3490537	3492762	-	0.345505	0.784343	0.532904
CCA0505S0234	evm.TU.Contig234.234	Contig234	scaffold14575	3493947	3495842	+	1.05251	1.35806	1.22025
CCA0505S0235	evm.TU.Contig234.235	Contig234	scaffold14575	3493738	3500981	-	20.5017	17.7973	14.2545
CCA0505S0236	evm.TU.Contig234.236	Contig234	scaffold14575	3505366	3507110	+	14.5215	25.8964	6.14878
CCA0505S0237	evm.TU.Contig234.237	Contig234	scaffold14575	3508159	3509142	+	5.42387	3.16949	1.7842
CCA0505S0238	evm.TU.Contig234.238	Contig234	scaffold14575	3510074	3510944	-	8.22067	6.36157	4.79207
CCA0505S0239	evm.TU.Contig234.239	Contig234	scaffold14575	3519083	3522132	-	1.63997	1.06444	2.81003
CCA0505S0240	evm.TU.Contig234.240	Contig234	scaffold14575	3523472	3527852	+	31.6599	27.7333	31.5231
CCA0505S0241	evm.TU.Contig234.241	Contig234	scaffold14575	3530949	3542549	+	16.2923	15.2611	16.1568
CCA0505S0242	evm.TU.Contig234.242	Contig234	scaffold14575	3561346	3564576	+	58.9339	27.1724	148.458
CCA0505S0243	evm.TU.Contig234.243	Contig234	scaffold14575	3574609	3575996	+	0.0277585	0.134951	0.0856427
CCA0505S0245	evm.TU.Contig234.245	Contig234	scaffold14575	3609705	3614225	+	19.0452	10.9777	16.2977
CCA0505S0246	evm.TU.Contig234.246	Contig234	scaffold14575	3616283	3617394	+	0.220534	5.04004	7.52195
CCA0505S0247	evm.TU.Contig234.247	Contig234	scaffold14575	3621901	3623296	+	0	0.0267999	0
CCA0505S0248	evm.TU.Contig234.248	Contig234	scaffold14575	3625856	3627016	+	0	0	0
CCA0505S0251	evm.TU.Contig234.251	Contig234	scaffold14575	3639974	3640719	+	0	0	0
CCA0505S0252	evm.TU.Contig234.252	Contig234	scaffold14575	3659808	3665115	+	53.8664	45.2221	58.5579
CCA0505S0253	evm.TU.Contig234.253	Contig234	scaffold14575	3666013	3683358	-	13.6293	5.92091	11.1354
CCA0505S0254	evm.TU.Contig234.254	Contig234	scaffold14575	3696163	3701221	+	36.0416	63.7711	42.9528
CCA0505S0255	evm.TU.Contig234.255	Contig234	scaffold14575	3703054	3703685	-	0	0	0
CCA0505S0256	evm.TU.Contig234.256	Contig234	scaffold14575	3704396	3707696	+	183.127	166.857	170.15
CCA0505S0257	evm.TU.Contig234.257	Contig234	scaffold14575	3709489	3715184	+	10.7626	8.95979	12.5979
CCA0505S0258	evm.TU.Contig234.258	Contig234	scaffold14575	3713405	3715012	-	8.81973	4.27923	7.78681
CCA0505S0259	evm.TU.Contig234.259	Contig234	scaffold14575	3716281	3720831	+	22.524	9.3496	22.6047
CCA0505S0260	evm.TU.Contig234.260	Contig234	scaffold14575	3721363	3725118	-	123.013	86.1179	73.1255
CCA0505S0261	evm.TU.Contig234.261	Contig234	scaffold14575	3726262	3731008	-	18.6751	21.3362	22.1029
CCA0505S0262	evm.TU.Contig234.262	Contig234	scaffold14575	3731762	3732520	-	0	0	0
CCA0505S0263	evm.TU.Contig234.263	Contig234	scaffold14575	3742104	3746788	+	28.3752	34.4018	19.2709
CCA0505S0264	evm.TU.Contig234.264	Contig234	scaffold14575	3746988	3749635	+	82.4575	206.665	198.17
CCA0505S0265	evm.TU.Contig234.265	Contig234	scaffold14575	3750213	3753283	+	35.8854	29.7873	17.5829
CCA0505S0266	evm.TU.Contig234.266	Contig234	scaffold14575	3760480	3766601	+	6.44596	2.52644	6.62959
CCA0505S0267	evm.TU.Contig234.267	Contig234	scaffold14575	3780093	3783046	+	155.783	241.693	179.36
CCA0505S0268	evm.TU.Contig234.268	Contig234	scaffold14575	3784999	3788273	-	28.3968	77.7367	34.0945
CCA0505S0269	evm.TU.Contig234.269	Contig234	scaffold14575	3799659	3805007	+	1.41933	3.43939	4.57943
CCA0505S0270	evm.TU.Contig234.270	Contig234	scaffold14575	3808707	3813211	-	39.8195	40.8016	33.7842
CCA0505S0271	evm.TU.Contig234.271	Contig234	scaffold14575	3818887	3820158	+	0.618836	0.090262	1.71832
CCA0505S0272	evm.TU.Contig234.272	Contig234	scaffold14575	3828748	3829680	-	0.325771	0.135804	0.0957135
CCA0505S0273	evm.TU.Contig234.273	Contig234	scaffold14575	3838616	3841411	+	3.76491	4.49943	2.14561
CCA0505S0276	evm.TU.Contig234.276	Contig234	scaffold14575	3867357	3871772	+	0	0	0
CCA0505S0277	evm.TU.Contig234.277	Contig234	scaffold14575	3887867	3889423	-	10.5493	5.35123	10.5266
CCA0505S0278	evm.TU.Contig234.278	Contig234	scaffold14575	3889479	3890318	-	10.6157	4.53498	9.6507
CCA0505S0279	evm.TU.Contig234.279	Contig234	scaffold14575	3890457	3891104	-	7.91496	3.61629	6.89209
CCA0505S0280	evm.TU.Contig234.280	Contig234	scaffold14575	3893091	3895838	-	0.178669	0.927133	0.306195
CCA0505S0281	evm.TU.Contig234.281	Contig234	scaffold14575	3898112	3899002	-	0.546025	3.76634	1.02087
CCA0505S0282	evm.TU.Contig234.282	Contig234	scaffold14575	3904119	3906631	-	18.4106	3.01192	10.7324
CCA0505S0283	evm.TU.Contig234.283	Contig234	scaffold14575	3913316	3917165	+	8.79852	2.85456	3.17412
CCA0505S0284	evm.TU.Contig234.284	Contig234	scaffold14575	3918395	3919346	-	0.066802	0.0650051	0.0686866
CCA0505S0285	evm.TU.Contig234.285	Contig234	scaffold14575	3930602	3934673	-	0.0291348	0.0141603	0.0449476
CCA0505S0287	evm.TU.Contig234.287	Contig234	scaffold14575	3945200	3947593	+	8.21509	4.13538	3.07793
CCA0505S0288	evm.TU.Contig234.288	Contig234	scaffold14575	3947827	3950584	-	0.900816	0.138261	1.12129
CCA0505S0290	evm.TU.Contig234.290	Contig234	scaffold14575	3954434	3955302	-	0.0826852	0.0804873	0.0850106
CCA0505S0293	evm.TU.Contig234.293	Contig234	scaffold14575	3959315	3960463	-	0	0.102766	0.79695
CCA0505S0294	evm.TU.Contig234.294	Contig234	scaffold14575	3971024	3974665	-	3.69669	2.19961	24.1819
CCA0505S0295	evm.TU.Contig234.295	Contig234	scaffold14575	3987104	3988083	-	0	0	0
CCA0505S0296	evm.TU.Contig234.296	Contig234	scaffold14575	4000920	4001126	-	0	0	0
CCA0505S0297	evm.TU.Contig234.297	Contig234	scaffold14575	4002164	4002499	-	0	0	1.27382
CCA0505S0298	evm.TU.Contig234.298	Contig234	scaffold14575	4002512	4003243	-	1.12841	0.7105	0.204749
CCA0505S0299	evm.TU.Contig234.299	Contig234	scaffold14575	4015456	4017305	+	10.1513	13.5456	10.9725
CCA0505S0300	evm.TU.Contig234.300	Contig234	scaffold14575	4017475	4022534	+	3.8972	2.43965	6.64344
CCA0505S0302	evm.TU.Contig234.302	Contig234	scaffold14575	4042945	4046603	+	9.48109	9.40856	15.3837
CCA0505S0303	evm.TU.Contig234.303	Contig234	scaffold14575	4059080	4063696	+	9.24042	13.4353	9.01064
CCA0505S0304	evm.TU.Contig234.304	Contig234	scaffold14575	4065190	4067486	+	24.5064	33.206	24.4257
CCA0505S0305	evm.TU.Contig234.305	Contig234	scaffold14575	4067415	4071994	-	4.2078	4.85996	6.55097
CCA0505S0306	evm.TU.Contig234.306	Contig234	scaffold14575	4074188	4078400	-	143.603	132.037	167.837
CCA0505S0307	evm.TU.Contig234.307	Contig234	scaffold14575	4084761	4088359	-	1.65815	2.17053	3.04977
CCA0505S0308	evm.TU.Contig234.308	Contig234	scaffold14575	4099218	4102739	+	23.2543	12.9541	23.8492
CCA0505S0309	evm.TU.Contig234.309	Contig234	scaffold14575	4104031	4105579	-	0	0	0
CCA0505S0310	evm.TU.Contig234.310	Contig234	scaffold14575	4105675	4110551	-	69.5762	97.8666	45.4267
CCA0505S0311	evm.TU.Contig234.311	Contig234	scaffold14575	4125508	4131024	+	0.165854	1.00761	0.739548
CCA0505S0312	evm.TU.Contig234.312	Contig234	scaffold14575	4127583	4136670	-	41.5923	25.9876	24.3064
CCA0505S0313	evm.TU.Contig234.313	Contig234	scaffold14575	4140380	4143572	-	143.892	87.4109	26.8944
CCA0505S0314	evm.TU.Contig234.314	Contig234	scaffold14575	4150372	4156019	+	2.27003	0.937333	1.23489
CCA0505S0316	evm.TU.Contig234.316	Contig234	scaffold14575	4161771	4162145	+	0.551097	0.53404	2.56911
CCA0505S0317	evm.TU.Contig234.317	Contig234	scaffold14575	4162411	4162878	+	0.0760582	0	0.078837
CCA0505S0319	evm.TU.Contig234.319	Contig234	scaffold14575	4171871	4177974	+	32.5937	43.345	38.5414
CCA0505S0320	evm.TU.Contig234.320	Contig234	scaffold14575	4178380	4185610	-	16.1389	12.6331	18.8168
CCA0505S0321	evm.TU.Contig234.321	Contig234	scaffold14575	4186108	4186422	+	3.40658	0	2.32483
CCA0505S0322	evm.TU.Contig234.322	Contig234	scaffold14575	4186457	4186939	+	0.140651	0.411227	1.15649
CCA0505S0323	evm.TU.Contig234.323	Contig234	scaffold14575	4202866	4223197	+	1.08679	3.86894	2.7775
CCA0505S0325	evm.TU.Contig234.325	Contig234	scaffold14575	4236128	4239654	+	5.4803	1.77603	2.97269
CCA0505S0326	evm.TU.Contig234.326	Contig234	scaffold14575	4240855	4241381	-	0.939452	4.23249	1.08641
CCA0505S0327	evm.TU.Contig234.327	Contig234	scaffold14575	4247895	4257460	+	34.4653	28.4754	25.3615
CCA0505S0328	evm.TU.Contig234.328	Contig234	scaffold14575	4261022	4264187	+	19.5751	7.94181	9.00447
CCA0505S0329	evm.TU.Contig234.329	Contig234	scaffold14575	4266867	4270472	-	8.89117	2.78255	5.68536
CCA0505S0330	evm.TU.Contig234.330	Contig234	scaffold14575	4274306	4280251	+	199.523	68.188	84.746
CCA0505S0331	evm.TU.Contig234.331	Contig234	scaffold14575	4280435	4285517	-	11.7081	20.7045	12.4375
CCA0505S0332	evm.TU.Contig234.332	Contig234	scaffold14575	4286360	4289120	+	4.73132	3.52828	3.50162
CCA0505S0334	evm.TU.Contig234.334	Contig234	scaffold14575	4295199	4300079	+	8.57802	4.36384	9.12235
CCA0505S0335	evm.TU.Contig234.335	Contig234	scaffold14575	4301350	4304606	-	30.0518	23.6985	21.4304
CCA0505S0337	evm.TU.Contig234.337	Contig234	scaffold14575	4309924	4319679	-	26.3994	20.9105	25.45
CCA0505S0338	evm.TU.Contig234.338	Contig234	scaffold14575	4338243	4343624	-	8.72135	6.03373	10.5192
CCA0505S0339	evm.TU.Contig234.339	Contig234	scaffold14575	4347837	4354303	-	9.68694	6.08372	1.86804
CCA0505S0340	evm.TU.Contig234.340	Contig234	scaffold14575	4355137	4361863	-	3.8289	7.60177	6.08651
CCA0505S0341	evm.TU.Contig234.341	Contig234	scaffold14575	4371891	4379714	-	0	0	0
CCA0505S0342	evm.TU.Contig234.342	Contig234	scaffold14575	4380541	4383646	+	23.9877	10.6655	12.3461
CCA0505S0343	evm.TU.Contig234.343	Contig234	scaffold14575	4394193	4403312	-	2.29852	3.55809	1.51475
CCA0505S0344	evm.TU.Contig234.344	Contig234	scaffold14575	4420550	4428415	-	2.25849	2.52938	2.20821
CCA0505S0345	evm.TU.Contig234.345	Contig234	scaffold14575	4436277	4438762	-	6.13591	8.59604	10.3591
CCA0505S0346	evm.TU.Contig234.346	Contig234	scaffold14575	4453969	4455791	-	0	0	0.161492
CCA0505S0347	evm.TU.Contig234.347	Contig234	scaffold14575	4457530	4459266	+	0.720443	0.269423	1.76682
CCA0505S0349	evm.TU.Contig234.349	Contig234	scaffold14575	4470093	4471927	-	23.2619	29.2301	16.8971
CCA0505S0350	evm.TU.Contig234.350	Contig234	scaffold14575	4478167	4480354	+	30.7614	26.6027	38.82
CCA0505S0351	evm.TU.Contig234.351	Contig234	scaffold14575	4499203	4502301	+	13.421	4.46642	18.8123
CCA0505S0352	evm.TU.Contig234.352	Contig234	scaffold14575	4508317	4508669	-	0	0	0
CCA0505S0353	evm.TU.Contig234.353	Contig234	scaffold14575	4510077	4510429	-	0	0	0
CCA0505S0354	evm.TU.Contig234.354	Contig234	scaffold14575	4511832	4513659	+	0.443935	0.549511	0.498026
CCA0505S0355	evm.TU.Contig234.355	Contig234	scaffold14575	4526755	4529156	+	21.9843	31.4843	26.4248
CCA0505S0356	evm.TU.Contig234.356	Contig234	scaffold14575	4531581	4538546	-	16.1716	8.90163	14.2512
CCA0505S0357	evm.TU.Contig234.357	Contig234	scaffold14575	4542266	4548680	-	34.2141	59.4452	43.685
CCA0505S0359	evm.TU.Contig234.359	Contig234	scaffold14575	4563068	4563916	+	0	0	0
CCA0506S0001	evm.TU.Contig23447.1	Contig23447	scaffold14625	58	332	+	0	0	0
CCA0507S0001	evm.TU.Contig235.1	Contig235	scaffold14681	34578	40268	+	4.53558	5.28705	5.16444
CCA0507S0002	evm.TU.Contig235.2	Contig235	scaffold14681	41648	47209	-	21.5969	23.1379	19.7298
CCA0507S0003	evm.TU.Contig235.3	Contig235	scaffold14681	67212	75789	+	15.968	15.1682	22.5483
CCA0507S0005	evm.TU.Contig235.5	Contig235	scaffold14681	80545	81510	-	4.44015	24.1214	15.2819
CCA0507S0006	evm.TU.Contig235.6	Contig235	scaffold14681	82896	83654	-	6.46655	21.0754	8.13388
CCA0507S0007	evm.TU.Contig235.7	Contig235	scaffold14681	90536	95312	+	24.8068	30.2852	20.9491
CCA0507S0008	evm.TU.Contig235.8	Contig235	scaffold14681	99961	101972	-	0	0	0
CCA0507S0009	evm.TU.Contig235.9	Contig235	scaffold14681	113084	113707	+	0	0	0
CCA0507S0010	evm.TU.Contig235.10	Contig235	scaffold14681	130391	136139	+	12.2399	18.4196	11.3044
CCA0507S0011	evm.TU.Contig235.11	Contig235	scaffold14681	140055	143721	+	0.74458	2.4626	1.58236
CCA0507S0013	evm.TU.Contig235.13	Contig235	scaffold14681	198963	208857	+	3.05324	4.36251	4.85416
CCA0507S0014	evm.TU.Contig235.14	Contig235	scaffold14681	220034	224297	+	12.6846	10.7986	18.0378
CCA0507S0015	evm.TU.Contig235.15	Contig235	scaffold14681	249565	256827	+	4.44045	8.44016	6.57002
CCA0507S0016	evm.TU.Contig235.16	Contig235	scaffold14681	282446	297383	-	125.01	70.1551	171.703
CCA0507S0017	evm.TU.Contig235.17	Contig235	scaffold14681	301896	304054	-	0	0	0
CCA0507S0019	evm.TU.Contig235.19	Contig235	scaffold14681	323840	329889	+	56.2252	68.2248	81.8456
CCA0507S0021	evm.TU.Contig235.21	Contig235	scaffold14681	336633	366834	+	19.8892	10.2795	20.7655
CCA0507S0022	evm.TU.Contig235.22	Contig235	scaffold14681	371250	373710	+	0	0	0
CCA0507S0023	evm.TU.Contig235.23	Contig235	scaffold14681	375562	376824	-	0	0	0.297235
CCA0507S0024	evm.TU.Contig235.24	Contig235	scaffold14681	410817	415994	+	0	0.0491649	0.190727
CCA0507S0026	evm.TU.Contig235.25_evm.TU.Contig235.26	Contig235	scaffold14681	432382	438177	+	4.13728	16.2187	3.56849
CCA0507S0027	evm.TU.Contig235.27	Contig235	scaffold14681	441833	444515	+	2.67084	2.63349	2.72244
CCA0507S0028	evm.TU.Contig235.28	Contig235	scaffold14681	446206	448170	+	3.9786	11.7061	10.6258
CCA0507S0029	evm.TU.Contig235.29	Contig235	scaffold14681	449498	451796	+	0.0501155	1.99878	1.50914
CCA0507S0030	evm.TU.Contig235.30	Contig235	scaffold14681	460361	463663	-	1.23952	4.67592	50.9909
CCA0507S0033	evm.TU.Contig235.33	Contig235	scaffold14681	477574	489176	-	45.2279	19.3243	35.9108
CCA0507S0034	evm.TU.Contig235.34	Contig235	scaffold14681	512582	515763	+	2.28849	1.42832	1.79628
CCA0507S0035	evm.TU.Contig235.35	Contig235	scaffold14681	516666	521060	+	45.6272	40.6477	42.5955
CCA0507S0036	evm.TU.Contig235.36	Contig235	scaffold14681	522360	526732	+	3.35735	7.65954	6.9718
CCA0507S0038	evm.TU.Contig235.38	Contig235	scaffold14681	556151	558119	+	0	0	0
CCA0507S0039	evm.TU.Contig235.39	Contig235	scaffold14681	561519	563322	-	0	0	4.4705
CCA0507S0040	evm.TU.Contig235.40	Contig235	scaffold14681	563374	563643	-	0	0	0
CCA0507S0041	evm.TU.Contig235.41	Contig235	scaffold14681	584659	588005	+	0	0	0
CCA0507S0042	evm.TU.Contig235.42	Contig235	scaffold14681	592651	595052	+	0	0	0
CCA0507S0045	evm.TU.Contig235.45	Contig235	scaffold14681	620163	621165	+	0	0	0.0641686
CCA0507S0046	evm.TU.Contig235.46	Contig235	scaffold14681	638434	642546	+	12.149	10.8895	10.3464
CCA0507S0047	evm.TU.Contig235.47	Contig235	scaffold14681	645308	653748	-	19.8234	14.9075	19.0527
CCA0507S0048	evm.TU.Contig235.48	Contig235	scaffold14681	671365	680332	+	42.6572	28.4227	32.521
CCA0507S0049	evm.TU.Contig235.49	Contig235	scaffold14681	683840	688231	+	27.4941	23.0113	15.3374
CCA0507S0050	evm.TU.Contig235.50	Contig235	scaffold14681	699616	703199	+	469.312	251.992	385.14
CCA0507S0051	evm.TU.Contig235.51	Contig235	scaffold14681	704910	709277	+	15.7111	4.65278	13.2846
CCA0507S0053	evm.TU.Contig235.53	Contig235	scaffold14681	749527	791682	-	16.4892	9.15098	10.0225
CCA0507S0057	evm.TU.Contig235.57	Contig235	scaffold14681	834352	840434	+	152.112	337.204	211.838
CCA0507S0059	evm.TU.Contig235.59	Contig235	scaffold14681	902332	909485	-	7.92754	13.7083	6.52255
CCA0507S0060	evm.TU.Contig235.60	Contig235	scaffold14681	926879	933274	+	0.0318875	0.0310075	0
CCA0507S0063	evm.TU.Contig235.63	Contig235	scaffold14681	960713	962724	+	0	0	0
CCA0507S0066	evm.TU.Contig235.66	Contig235	scaffold14681	1084751	1088285	+	3.60728	3.6568	4.06296
CCA0507S0067	evm.TU.Contig235.67	Contig235	scaffold14681	1088782	1095089	+	0.160072	0.156067	0
CCA0507S0068	evm.TU.Contig235.68	Contig235	scaffold14681	1103721	1111354	+	22.6928	16.7074	32.7098
CCA0507S0069	evm.TU.Contig235.69	Contig235	scaffold14681	1111696	1119647	-	3.44957	4.08027	3.64208
CCA0507S0070	evm.TU.Contig235.70	Contig235	scaffold14681	1126753	1132318	-	0.623718	0.996661	0.412323
CCA0507S0073	evm.TU.Contig235.73	Contig235	scaffold14681	1164599	1199341	+	55.994	95.0042	64.6715
CCA0507S0074	evm.TU.Contig235.74	Contig235	scaffold14681	1236792	1242217	+	5.94929	10.6315	8.40758
CCA0507S0075	evm.TU.Contig235.75	Contig235	scaffold14681	1267816	1269939	+	36.1977	7.11771	353.109
CCA0507S0078	evm.TU.Contig235.78	Contig235	scaffold14681	1391811	1394983	+	9.93553	2.65266	6.54799
CCA0507S0080	evm.TU.Contig235.80	Contig235	scaffold14681	1404845	1406161	-	13.0641	10.1682	16.2078
CCA0507S0081	evm.TU.Contig235.81	Contig235	scaffold14681	1441949	1445920	+	24.8012	49.9339	19.8248
CCA0507S0082	evm.TU.Contig235.82	Contig235	scaffold14681	1446614	1453745	-	6.15864	3.93682	5.62667
CCA0507S0083	evm.TU.Contig235.83	Contig235	scaffold14681	1463797	1465341	+	0.0243657	0.0947586	0.100235
CCA0507S0084	evm.TU.Contig235.84	Contig235	scaffold14681	1468245	1472314	+	1.53169	68.8094	18.9361
CCA0507S0085	evm.TU.Contig235.85	Contig235	scaffold14681	1472778	1482325	-	53.1044	61.231	53.5115
CCA0507S0086	evm.TU.Contig235.86	Contig235	scaffold14681	1484929	1489293	-	6.21696	1.90457	4.58358
CCA0507S0088	evm.TU.Contig235.88	Contig235	scaffold14681	1513265	1518291	-	51.1648	140.914	60.7913
CCA0507S0089	evm.TU.Contig235.89	Contig235	scaffold14681	1520318	1521027	+	77.4777	80.4456	96.121
CCA0507S0090	evm.TU.Contig235.90	Contig235	scaffold14681	1521708	1532045	-	22.8249	39.419	23.3371
CCA0507S0091	evm.TU.Contig235.91	Contig235	scaffold14681	1593026	1603973	+	66.7405	97.576	74.6328
CCA0507S0093	evm.TU.Contig235.93	Contig235	scaffold14681	1605004	1606730	-	1.20009	1.74876	3.07545
CCA0507S0094	evm.TU.Contig235.94	Contig235	scaffold14681	1686217	1688646	+	2.34503	5.57947	10.5357
CCA0507S0096	evm.TU.Contig235.96	Contig235	scaffold14681	1714848	1722957	-	14.6214	23.846	22.197
CCA0507S0097	evm.TU.Contig235.97	Contig235	scaffold14681	1754461	1769200	-	5.73529	5.84631	7.38218
CCA0507S0098	evm.TU.Contig235.98	Contig235	scaffold14681	1777921	1788192	-	12.5227	10.6383	13.6504
CCA0507S0100	evm.TU.Contig235.100	Contig235	scaffold14681	1813752	1825874	-	18.1678	9.9926	11.5432
CCA0507S0101	evm.TU.Contig235.101	Contig235	scaffold14681	1839186	1841122	-	34.4623	29.7635	21.3123
CCA0507S0103	evm.TU.Contig235.103	Contig235	scaffold14681	1880616	1883327	-	0.267275	0.173216	0.769686
CCA0507S0105	evm.TU.Contig235.105	Contig235	scaffold14681	1959772	1960116	-	0	0	0
CCA0507S0106	evm.TU.Contig235.106	Contig235	scaffold14681	1960368	1965415	+	2.98242	2.44176	5.56862
CCA0507S0107	evm.TU.Contig235.107	Contig235	scaffold14681	1966492	1971189	+	13.4143	4.55403	13.5051
CCA0507S0108	evm.TU.Contig235.108	Contig235	scaffold14681	1970810	1973388	-	0.0275999	0	0.0567695
CCA0507S0109	evm.TU.Contig235.109	Contig235	scaffold14681	1979529	1981787	+	105.361	389.88	141.452
CCA0507S0112	evm.TU.Contig235.112	Contig235	scaffold14681	1998080	2007206	-	6.62518	2.6834	8.24124
CCA0507S0115	evm.TU.Contig235.115	Contig235	scaffold14681	2107850	2115542	+	4.04973	6.68805	55.9291
CCA0507S0117	evm.TU.Contig235.117	Contig235	scaffold14681	2148374	2149927	+	0.0550519	0.321349	0.169826
CCA0507S0118	evm.TU.Contig235.118	Contig235	scaffold14681	2150018	2157329	-	2.72845	2.88467	5.74828
CCA0507S0119	evm.TU.Contig235.119	Contig235	scaffold14681	2174913	2182620	+	9.02156	9.48823	8.69457
CCA0507S0120	evm.TU.Contig235.120	Contig235	scaffold14681	2228097	2230882	+	3.86657	3.6379	3.02084
CCA0507S0121	evm.TU.Contig235.121	Contig235	scaffold14681	2234086	2240961	+	1.52738	2.19472	1.32504
CCA0507S0123	evm.TU.Contig235.123	Contig235	scaffold14681	2256600	2267367	+	13.1964	12.2115	13.4869
CCA0507S0124	evm.TU.Contig235.124	Contig235	scaffold14681	2268370	2273277	-	10.1582	22.2099	9.51697
CCA0507S0126	evm.TU.Contig235.126	Contig235	scaffold14681	2279842	2281769	-	7.73298	8.0467	6.13862
CCA0507S0127	evm.TU.Contig235.127	Contig235	scaffold14681	2291969	2293248	-	24.4095	126.331	83.7616
CCA0507S0128	evm.TU.Contig235.128	Contig235	scaffold14681	2312967	2314813	+	107.375	182.994	75.3323
CCA0507S0129	evm.TU.Contig235.129	Contig235	scaffold14681	2316307	2316762	-	0	0	0
CCA0507S0130	evm.TU.Contig235.130	Contig235	scaffold14681	2322369	2325739	-	0	0	0
CCA0507S0131	evm.TU.Contig235.131	Contig235	scaffold14681	2328066	2330465	-	0.0329969	0.192522	0.16967
CCA0507S0132	evm.TU.Contig235.132	Contig235	scaffold14681	2332830	2338294	-	0.117111	0.645151	2.39553
CCA0507S0133	evm.TU.Contig235.133	Contig235	scaffold14681	2342786	2347377	-	0.262255	0.872104	8.98628
CCA0507S0134	evm.TU.Contig235.134	Contig235	scaffold14681	2366349	2372796	+	9.84618	2.77702	11.0475
CCA0507S0136	evm.TU.Contig235.136	Contig235	scaffold14681	2397633	2399014	-	0.0944074	0	0
CCA0507S0137	evm.TU.Contig235.137	Contig235	scaffold14681	2399660	2414876	+	73.8074	54.8817	48.362
CCA0507S0138	evm.TU.Contig235.138	Contig235	scaffold14681	2417115	2422501	+	28.8701	12.7252	23.5355
CCA0507S0139	evm.TU.Contig235.139	Contig235	scaffold14681	2422772	2425104	+	1.29123	1.05579	1.3581
CCA0507S0140	evm.TU.Contig235.140	Contig235	scaffold14681	2433656	2443010	+	29.405	28.249	25.9951
CCA0507S0141	evm.TU.Contig235.141	Contig235	scaffold14681	2443463	2445708	-	0.0209001	0	0.021495
CCA0507S0142	evm.TU.Contig235.142	Contig235	scaffold14681	2447415	2453101	+	7.06468	14.9963	9.90299
CCA0507S0144	evm.TU.Contig235.144	Contig235	scaffold14681	2461375	2462437	-	0	0.0853406	0.125332
CCA0507S0146	evm.TU.Contig235.146	Contig235	scaffold14681	2467996	2469058	-	0.0389999	0.154877	0.163767
CCA0507S0147	evm.TU.Contig235.147	Contig235	scaffold14681	2472565	2474157	-	0	0	0.503189
CCA0507S0149	evm.TU.Contig235.149	Contig235	scaffold14681	2484895	2488572	+	210.17	200.269	122.26
CCA0507S0150	evm.TU.Contig235.150	Contig235	scaffold14681	2489665	2493816	+	28.9683	27.8054	27.5935
CCA0507S0151	evm.TU.Contig235.151	Contig235	scaffold14681	2494751	2495848	+	0.605002	0.950627	1.53142
CCA0507S0152	evm.TU.Contig235.152	Contig235	scaffold14681	2495879	2504265	+	0.158241	0.197801	1.16246
CCA0507S0153	evm.TU.Contig235.153	Contig235	scaffold14681	2524403	2528167	+	0	0	0
CCA0507S0154	evm.TU.Contig235.154	Contig235	scaffold14681	2531543	2533722	-	34.4312	25.8987	37.4426
CCA0507S0155	evm.TU.Contig235.155	Contig235	scaffold14681	2535207	2539002	-	57.4248	32.571	49.6056
CCA0507S0156	evm.TU.Contig235.156	Contig235	scaffold14681	2541207	2551551	-	1.78339	0.67596	1.05684
CCA0507S0157	evm.TU.Contig235.157	Contig235	scaffold14681	2562230	2564513	-	0	0.191663	1.33825
CCA0507S0158	evm.TU.Contig235.158	Contig235	scaffold14681	2574060	2576387	+	0	0	0
CCA0507S0159	evm.TU.Contig235.159	Contig235	scaffold14681	2576392	2577348	+	0	0	0
CCA0507S0160	evm.TU.Contig235.160	Contig235	scaffold14681	2578683	2578988	+	0	1.31674	0
CCA0507S0161	evm.TU.Contig235.161	Contig235	scaffold14681	2591671	2598452	+	7.95028	3.45767	11.1503
CCA0507S0162	evm.TU.Contig235.162	Contig235	scaffold14681	2598609	2603830	+	8.51504	5.61263	10.5274
CCA0507S0163	evm.TU.Contig235.163	Contig235	scaffold14681	2604601	2607702	+	73.0081	133.979	50.5683
CCA0507S0164	evm.TU.Contig235.164	Contig235	scaffold14681	2607998	2610689	-	27.0804	24.8851	28.831
CCA0507S0165	evm.TU.Contig235.165	Contig235	scaffold14681	2611048	2614649	+	12.9399	18.0931	15.6841
CCA0507S0166	evm.TU.Contig235.166	Contig235	scaffold14681	2614673	2619788	-	8.24836	12.794	7.16993
CCA0507S0167	evm.TU.Contig235.167	Contig235	scaffold14681	2620549	2629316	-	8.52821	13.6729	11.5316
CCA0507S0168	evm.TU.Contig235.168	Contig235	scaffold14681	2642460	2649585	-	13.2385	16.1397	10.6384
CCA0507S0169	evm.TU.Contig235.169	Contig235	scaffold14681	2657397	2657795	+	0.903651	0.220571	0.465369
CCA0507S0170	evm.TU.Contig235.170	Contig235	scaffold14681	2657428	2663713	-	3.68122	0.591473	3.06639
CCA0507S0171	evm.TU.Contig235.171	Contig235	scaffold14681	2670328	2682085	+	13.3793	3.45277	23.4514
CCA0507S0172	evm.TU.Contig235.172	Contig235	scaffold14681	2686301	2687544	-	3.75508	1.85667	1.50542
CCA0507S0173	evm.TU.Contig235.173	Contig235	scaffold14681	2690197	2697039	-	7.60755	6.16531	5.82234
CCA0507S0174	evm.TU.Contig235.174	Contig235	scaffold14681	2699389	2700246	+	0.10476	1.37581	1.77744
CCA0507S0175	evm.TU.Contig235.175	Contig235	scaffold14681	2701273	2704911	+	6.71688	5.4908	8.13623
CCA0507S0176	evm.TU.Contig235.176	Contig235	scaffold14681	2705784	2709989	-	5.94942	2.40568	6.1189
CCA0507S0177	evm.TU.Contig235.177	Contig235	scaffold14681	2713664	2716346	+	0.534276	13.0478	3.58262
CCA0507S0178	evm.TU.Contig235.178	Contig235	scaffold14681	2716661	2720428	-	13.8456	25.4137	17.5186
CCA0507S0179	evm.TU.Contig235.179	Contig235	scaffold14681	2722821	2723511	+	163.935	164.638	150.615
CCA0507S0180	evm.TU.Contig235.180	Contig235	scaffold14681	2728211	2734663	+	18.3911	10.0737	18.2416
CCA0507S0182	evm.TU.Contig235.182	Contig235	scaffold14681	2751825	2760262	-	1.31884	0.3375	0.228689
CCA0507S0183	evm.TU.Contig235.183	Contig235	scaffold14681	2764671	2779386	-	0	0	0
CCA0507S0184	evm.TU.Contig235.184	Contig235	scaffold14681	2780179	2781030	+	19.1539	15.442	9.08616
CCA0507S0185	evm.TU.Contig235.185	Contig235	scaffold14681	2781999	2786802	-	5.89905	5.42115	6.80664
CCA0507S0186	evm.TU.Contig235.186	Contig235	scaffold14681	2789756	2790610	-	10.2657	7.68201	8.28245
CCA0507S0187	evm.TU.Contig235.187	Contig235	scaffold14681	2790808	2791377	-	0.101118	0	0
CCA0507S0190	evm.TU.Contig235.190	Contig235	scaffold14681	2811660	2814644	+	0.583414	0.331966	11.8984
CCA0507S0191	evm.TU.Contig235.191	Contig235	scaffold14681	2820672	2829989	+	16.6639	30.8733	13.9874
CCA0507S0192	evm.TU.Contig235.192	Contig235	scaffold14681	2830821	2832506	-	0	0	0
CCA0507S0193	evm.TU.Contig235.193	Contig235	scaffold14681	2834267	2836786	+	7.03669	1.91196	4.5874
CCA0507S0194	evm.TU.Contig235.194	Contig235	scaffold14681	2838541	2866003	+	47.0754	50.9233	52.3303
CCA0507S0195	evm.TU.Contig235.195	Contig235	scaffold14681	2899484	2901195	+	1.1449	2.11264	0.624781
CCA0507S0196	evm.TU.Contig235.196	Contig235	scaffold14681	2904556	2904885	-	4.93738	4.84754	6.45062
CCA0507S0197	evm.TU.Contig235.197	Contig235	scaffold14681	2904907	2906179	-	3.27666	2.29	5.61465
CCA0507S0198	evm.TU.Contig235.198	Contig235	scaffold14681	2906216	2908971	-	3.84651	2.94204	4.87894
CCA0507S0199	evm.TU.Contig235.199	Contig235	scaffold14681	2910774	2915577	-	12.2472	4.08634	8.4114
CCA0507S0200	evm.TU.Contig235.200	Contig235	scaffold14681	2916060	2923369	+	53.4009	77.0472	63.4902
CCA0507S0201	evm.TU.Contig235.201	Contig235	scaffold14681	2923871	2924311	+	511.443	548.495	495.642
CCA0507S0203	evm.TU.Contig235.202_evm.TU.Contig235.203	Contig235	scaffold14681	2923783	2927564	-	4.38676	6.99286	8.67479
CCA0507S0205	evm.TU.Contig235.205	Contig235	scaffold14681	2949792	2951961	+	0	0	0
CCA0507S0206	evm.TU.Contig235.206	Contig235	scaffold14681	2960781	3014883	+	1.15901	10.0945	179.236
CCA0507S0207	evm.TU.Contig235.207	Contig235	scaffold14681	3016912	3018188	+	0.0432582	5.34343	56.0056
CCA0507S0208	evm.TU.Contig235.208	Contig235	scaffold14681	3025412	3029830	+	27.6857	40.3383	16.9569
CCA0507S0209	evm.TU.Contig235.209	Contig235	scaffold14681	3033139	3037053	+	35.9477	67.7924	30.8244
CCA0507S0212	evm.TU.Contig235.212	Contig235	scaffold14681	3056201	3056700	+	0.490468	0	0
CCA0507S0213	evm.TU.Contig235.213	Contig235	scaffold14681	3057894	3061798	+	9.71051	3.67932	9.58199
CCA0507S0214	evm.TU.Contig235.214	Contig235	scaffold14681	3070705	3077708	+	7.27075	3.44765	5.9417
CCA0507S0215	evm.TU.Contig235.215	Contig235	scaffold14681	3078105	3081528	-	30.9556	28.3558	16.7366
CCA0507S0216	evm.TU.Contig235.216	Contig235	scaffold14681	3082804	3087010	+	43.7524	29.0191	36.7764
CCA0507S0217	evm.TU.Contig235.217	Contig235	scaffold14681	3088251	3092832	+	9.69538	14.1972	12.3604
CCA0507S0218	evm.TU.Contig235.218	Contig235	scaffold14681	3093970	3095874	-	0.0430796	0	0
CCA0507S0219	evm.TU.Contig235.219	Contig235	scaffold14681	3095926	3096255	-	0	0.881372	0
CCA0507S0220	evm.TU.Contig235.220	Contig235	scaffold14681	3098042	3100133	-	39.0069	38.4386	31.4152
CCA0507S0221	evm.TU.Contig235.221	Contig235	scaffold14681	3100577	3112999	-	19.0039	13.7424	9.85337
CCA0507S0222	evm.TU.Contig235.222	Contig235	scaffold14681	3121594	3123431	+	34.0458	16.8769	19.7929
CCA0507S0224	evm.TU.Contig235.224	Contig235	scaffold14681	3145881	3151054	-	16.2732	14.4879	17.3667
CCA0507S0225	evm.TU.Contig235.225	Contig235	scaffold14681	3153112	3154309	+	3.19691	5.76854	4.09741
CCA0507S0226	evm.TU.Contig235.226	Contig235	scaffold14681	3155300	3173376	-	8.05718	5.67364	9.02959
CCA0507S0227	evm.TU.Contig235.227	Contig235	scaffold14681	3179983	3197253	+	19.452	16.8813	27.2605
CCA0507S0228	evm.TU.Contig235.228	Contig235	scaffold14681	3200147	3203667	-	3.54035	9.20342	3.71846
[truncated: 30,909 more rows]
